# Supplementary material
Source: PubMed Central journal article supplement (PMC6239953)
Supplement: NIHMS1508050-supplement-3.pdf [file NIHMS1508050-supplement-3.pdf]

**Supplementary Table S1: Differentially expressed genes in serial biopsies of VCaP xenografts, AER vs. Pre-Cx.** Expression data from RNA sequencing of serial biopsies of VCaP tumors prior to castration (Pre-Cx) and following development of abiraterone and enzalutamide resistance (AER). log2FC – log2 fold change

| <b>Ensemble ID</b> | <b>log2FC</b> | <b>P Value</b> | <b>Symbol</b> |
|--------------------|---------------|----------------|---------------|
| ENSG00000135063    | -7.696        | 1.49E-08       | FAM189A2      |
| ENSG00000197635    | -6.831        | 5.40E-13       | DPP4          |
| ENSG00000156463    | -5.174        | 1.47E-06       | SH3RF2        |
| ENSG00000075461    | -5.140        | 5.27E-08       | CACNG4        |
| ENSG00000235410    | -5.050        | 6.30E-07       | NA            |
| ENSG00000170419    | -5.013        | 5.87E-10       | VSTM2A        |
| ENSG00000070526    | -4.995        | 7.85E-09       | ST6GALNAC1    |
| ENSG00000224223    | -4.928        | 2.19E-06       | VSTM2A-OT1    |
| ENSG00000088992    | -4.872        | 8.82E-11       | TESC          |
| ENSG00000148702    | -4.840        | 9.82E-06       | HABP2         |
| ENSG00000165092    | -4.737        | 3.71E-10       | ALDH1A1       |
| ENSG00000187398    | -4.618        | 1.80E-09       | LUZP2         |
| ENSG00000233001    | -4.317        | 3.02E-05       | NA            |
| ENSG00000183929    | -4.246        | 2.07E-05       | NA            |
| ENSG00000144481    | -4.234        | 1.32E-12       | TRPM8         |
| ENSG00000229751    | -4.190        | 8.06E-07       | NA            |
| ENSG00000158164    | -4.044        | 4.27E-06       | TMSB15A       |
| ENSG00000237654    | -3.983        | 1.85E-10       | LOC101929653  |
| ENSG00000229763    | -3.847        | 1.34E-04       | NA            |
| ENSG00000013588    | -3.684        | 1.47E-04       | GPRC5A        |
| ENSG00000147234    | -3.623        | 5.52E-07       | FRMPD3        |
| ENSG00000168404    | -3.576        | 2.83E-04       | MLKL          |
| ENSG00000107742    | -3.575        | 3.09E-11       | SPOCK2        |
| ENSG00000127954    | -3.565        | 1.78E-13       | STEAP4        |
| ENSG00000225415    | -3.533        | 3.23E-04       | NA            |
| ENSG00000237697    | -3.520        | 2.44E-04       | NA            |
| ENSG00000223298    | -3.516        | 2.73E-05       | NA            |
| ENSG00000188153    | -3.492        | 5.26E-12       | COL4A5        |
| ENSG00000237581    | -3.490        | 3.95E-05       | NA            |
| ENSG00000164326    | -3.442        | 2.09E-04       | CARTPT        |
| ENSG00000165023    | -3.430        | 1.19E-10       | DIRAS2        |
| ENSG00000101323    | -3.402        | 6.84E-04       | HAO1          |

|                 |        |          |            |
|-----------------|--------|----------|------------|
| ENSG00000207040 | -3.339 | 5.26E-04 | NA         |
| ENSG00000124490 | -3.338 | 4.23E-06 | CRISP2     |
| ENSG00000154065 | -3.330 | 8.85E-10 | ANKRD29    |
| ENSG00000224700 | -3.287 | 1.50E-04 | NA         |
| ENSG00000201570 | -3.279 | 3.01E-04 | NA         |
| ENSG00000115263 | -3.277 | 5.65E-04 | GCG        |
| ENSG00000185915 | -3.253 | 1.19E-03 | KLHL34     |
| ENSG00000143318 | -3.251 | 5.96E-04 | CASQ1      |
| ENSG00000238379 | -3.251 | 9.96E-04 | NA         |
| ENSG00000236082 | -3.248 | 3.27E-04 | NA         |
| ENSG00000115361 | -3.248 | 1.78E-04 | ACADL      |
| ENSG00000212122 | -3.242 | 6.41E-04 | TSSK1B     |
| ENSG00000168743 | -3.212 | 7.37E-04 | NPNT       |
| ENSG00000236581 | -3.208 | 3.15E-04 | STARD13-AS |
| ENSG00000223283 | -3.198 | 2.52E-04 | NA         |
| ENSG00000204257 | -3.187 | 1.60E-10 | HLA-DMA    |
| ENSG00000212354 | -3.145 | 3.62E-03 | NA         |
| ENSG00000228113 | -3.136 | 5.40E-04 | NA         |
| ENSG00000185087 | -3.111 | 3.17E-05 | FAM169B    |
| ENSG00000186847 | -3.109 | 5.13E-06 | KRT14      |
| ENSG00000167957 | -3.103 | 1.37E-03 | NA         |
| ENSG00000206647 | -3.097 | 9.00E-04 | NA         |
| ENSG00000050165 | -3.088 | 1.81E-03 | DKK3       |
| ENSG00000171885 | -3.076 | 1.22E-03 | AQP4       |
| ENSG00000198088 | -3.075 | 8.28E-04 | NUP62CL    |
| ENSG00000199962 | -3.064 | 3.97E-05 | NA         |
| ENSG00000174473 | -3.050 | 2.16E-03 | GALNTL6    |
| ENSG00000091129 | -3.048 | 1.25E-12 | NRCAM      |
| ENSG00000207146 | -3.048 | 6.32E-04 | NA         |
| ENSG00000236604 | -3.040 | 3.76E-04 | NA         |
| ENSG00000197459 | -3.026 | 3.38E-05 | NA         |
| ENSG00000227742 | -3.021 | 9.18E-04 | NA         |
| ENSG00000213759 | -3.016 | 6.60E-04 | UGT2B11    |
| ENSG00000200220 | -3.000 | 1.81E-03 | NA         |
| ENSG00000134531 | -2.985 | 8.44E-04 | EMP1       |
| ENSG00000207561 | -2.985 | 9.81E-04 | MIR635     |
| ENSG00000224795 | -2.969 | 1.37E-05 | NTM-AS1    |
| ENSG00000053747 | -2.968 | 6.92E-15 | LAMA3      |
| ENSG00000205518 | -2.961 | 1.64E-03 | NA         |

|                 |        |          |         |
|-----------------|--------|----------|---------|
| ENSG00000156096 | -2.955 | 9.56E-08 | UGT2B4  |
| ENSG00000238732 | -2.955 | 8.25E-04 | NA      |
| ENSG00000233530 | -2.954 | 4.20E-03 | NA      |
| ENSG00000166741 | -2.945 | 7.80E-08 | NNMT    |
| ENSG00000224359 | -2.943 | 1.18E-03 | NA      |
| ENSG00000113396 | -2.930 | 1.54E-06 | SLC27A6 |
| ENSG00000162398 | -2.919 | 1.51E-03 | LEXM    |
| ENSG00000237796 | -2.908 | 9.75E-08 | NA      |
| ENSG00000100170 | -2.904 | 1.50E-04 | SLC5A1  |
| ENSG00000196550 | -2.893 | 2.92E-03 | FAM72C  |
| ENSG00000182667 | -2.881 | 4.30E-08 | NTM     |
| ENSG00000238045 | -2.866 | 9.23E-05 | NA      |
| ENSG00000196482 | -2.864 | 1.00E-09 | ESRRG   |
| ENSG00000113924 | -2.847 | 1.30E-10 | HGD     |
| ENSG00000131844 | -2.837 | 4.74E-09 | MCCC2   |
| ENSG00000074219 | -2.814 | 1.13E-03 | TEAD2   |
| ENSG00000171444 | -2.802 | 4.26E-11 | MCC     |
| ENSG00000183023 | -2.782 | 3.68E-03 | SLC8A1  |
| ENSG00000110799 | -2.774 | 7.72E-07 | VWF     |
| ENSG00000180891 | -2.774 | 3.29E-07 | CUEDC1  |
| ENSG00000213777 | -2.772 | 3.00E-13 | NA      |
| ENSG00000212066 | -2.761 | 5.08E-04 | NA      |
| ENSG00000171234 | -2.739 | 6.40E-05 | UGT2B7  |
| ENSG00000183486 | -2.709 | 8.38E-03 | MX2     |
| ENSG00000227112 | -2.701 | 2.15E-03 | NA      |
| ENSG00000234469 | -2.699 | 4.45E-03 | CLDN34  |
| ENSG00000203971 | -2.680 | 8.01E-04 | NA      |
| ENSG00000236115 | -2.665 | 6.72E-03 | NA      |
| ENSG00000163492 | -2.653 | 4.57E-05 | CCDC141 |
| ENSG00000215443 | -2.646 | 9.28E-03 | NA      |
| ENSG00000232111 | -2.641 | 2.97E-03 | NA      |
| ENSG00000104415 | -2.639 | 9.63E-06 | WISP1   |
| ENSG00000172771 | -2.639 | 1.01E-04 | EFCAB12 |
| ENSG00000233589 | -2.633 | 6.69E-03 | NA      |
| ENSG00000228625 | -2.627 | 8.34E-03 | NA      |
| ENSG00000103460 | -2.619 | 8.55E-10 | TOX3    |
| ENSG00000154274 | -2.619 | 2.52E-09 | C4orf19 |
| ENSG00000198643 | -2.619 | 6.22E-04 | FAM3D   |
| ENSG00000042832 | -2.616 | 2.03E-09 | TG      |

|                 |        |          |         |
|-----------------|--------|----------|---------|
| ENSG00000230918 | -2.614 | 2.71E-03 | NA      |
| ENSG00000197977 | -2.613 | 6.56E-11 | ELOVL2  |
| ENSG00000149970 | -2.565 | 1.47E-09 | CNKSR2  |
| ENSG00000187928 | -2.562 | 4.06E-03 | NA      |
| ENSG00000174429 | -2.552 | 3.24E-04 | ABRA    |
| ENSG00000207046 | -2.533 | 2.55E-03 | NA      |
| ENSG00000215397 | -2.511 | 1.24E-04 | SCRT2   |
| ENSG00000164106 | -2.505 | 5.75E-05 | SCRG1   |
| ENSG00000133808 | -2.501 | 8.26E-07 | MICALCL |
| ENSG00000166546 | -2.489 | 3.56E-08 | BEAN1   |
| ENSG00000146955 | -2.477 | 5.82E-03 | RAB19   |
| ENSG00000125999 | -2.473 | 3.95E-03 | BPIFB1  |
| ENSG00000232807 | -2.457 | 4.25E-03 | NA      |
| ENSG00000186204 | -2.440 | 7.70E-09 | CYP4F12 |
| ENSG00000168126 | -2.438 | 1.50E-04 | NA      |
| ENSG00000233431 | -2.427 | 1.08E-03 | NA      |
| ENSG00000149150 | -2.418 | 5.68E-12 | SLC43A1 |
| ENSG00000149256 | -2.415 | 1.25E-06 | TENM4   |
| ENSG00000168314 | -2.413 | 5.84E-03 | MOBP    |
| ENSG00000227945 | -2.412 | 1.23E-03 | NA      |
| ENSG00000124107 | -2.402 | 1.35E-03 | SLPI    |
| ENSG00000238060 | -2.400 | 5.94E-03 | NA      |
| ENSG00000230074 | -2.399 | 7.36E-03 | NA      |
| ENSG00000224720 | -2.392 | 6.43E-05 | NA      |
| ENSG00000078898 | -2.384 | 1.43E-04 | BPIFB2  |
| ENSG00000149218 | -2.384 | 5.00E-10 | ENDOD1  |
| ENSG00000224733 | -2.378 | 2.60E-04 | NA      |
| ENSG00000133816 | -2.374 | 1.63E-10 | MICAL2  |
| ENSG00000147251 | -2.358 | 5.10E-03 | DOCK11  |
| ENSG00000163472 | -2.349 | 8.52E-10 | TMEM79  |
| ENSG00000197565 | -2.348 | 4.73E-04 | COL4A6  |
| ENSG00000162174 | -2.337 | 1.58E-10 | ASRGL1  |
| ENSG00000186523 | -2.333 | 5.94E-03 | FAM86B1 |
| ENSG00000124657 | -2.330 | 1.30E-03 | OR2B6   |
| ENSG00000079616 | -2.327 | 1.38E-12 | KIF22   |
| ENSG00000196187 | -2.326 | 4.56E-11 | TMEM63A |
| ENSG00000081277 | -2.319 | 1.18E-11 | PKP1    |
| ENSG00000104205 | -2.315 | 2.05E-07 | SGK3    |
| ENSG00000238463 | -2.309 | 4.61E-04 | NA      |

|                 |        |          |           |
|-----------------|--------|----------|-----------|
| ENSG00000112183 | -2.309 | 3.32E-06 | RBM24     |
| ENSG00000112303 | -2.305 | 1.38E-03 | VNN2      |
| ENSG00000232583 | -2.303 | 1.55E-03 | NA        |
| ENSG00000116133 | -2.303 | 1.74E-08 | DHCR24    |
| ENSG00000143797 | -2.297 | 2.84E-13 | MBOAT2    |
| ENSG00000133083 | -2.282 | 9.66E-09 | DCLK1     |
| ENSG00000128284 | -2.281 | 1.22E-06 | APOL3     |
| ENSG00000224403 | -2.269 | 9.64E-03 | NA        |
| ENSG00000128596 | -2.252 | 8.48E-08 | CCDC136   |
| ENSG00000187942 | -2.243 | 5.81E-05 | LDLRAD2   |
| ENSG00000215784 | -2.238 | 1.78E-03 | FAM72D    |
| ENSG00000234600 | -2.238 | 9.27E-03 | NA        |
| ENSG00000079337 | -2.236 | 1.71E-09 | RAPGEF3   |
| ENSG00000133121 | -2.235 | 1.14E-07 | STARD13   |
| ENSG00000227521 | -2.225 | 1.83E-03 | NA        |
| ENSG00000140009 | -2.211 | 3.94E-04 | ESR2      |
| ENSG00000018408 | -2.204 | 1.00E-06 | WWTR1     |
| ENSG00000213892 | -2.203 | 3.22E-03 | CEACAM16  |
| ENSG00000200040 | -2.202 | 6.62E-03 | NA        |
| ENSG00000128591 | -2.197 | 1.58E-05 | FLNC      |
| ENSG00000225966 | -2.196 | 2.30E-05 | NA        |
| ENSG00000225808 | -2.189 | 3.48E-04 | NA        |
| ENSG00000232558 | -2.188 | 2.41E-04 | KCND3-IT1 |
| ENSG00000101670 | -2.186 | 2.81E-11 | LIPG      |
| ENSG00000126785 | -2.185 | 3.79E-05 | RHOJ      |
| ENSG00000112414 | -2.183 | 1.15E-07 | ADGRG6    |
| ENSG00000180720 | -2.173 | 3.52E-03 | CHRM4     |
| ENSG00000237996 | -2.168 | 2.79E-05 | NA        |
| ENSG00000227410 | -2.166 | 5.29E-03 | NA        |
| ENSG00000206190 | -2.164 | 1.25E-06 | ATP10A    |
| ENSG00000138356 | -2.162 | 1.44E-05 | AOX1      |
| ENSG00000157343 | -2.155 | 4.61E-06 | ARMC12    |
| ENSG00000234199 | -2.152 | 7.26E-03 | LINC01191 |
| ENSG00000119139 | -2.150 | 4.34E-06 | TJP2      |
| ENSG00000229677 | -2.150 | 1.23E-03 | NA        |
| ENSG00000158747 | -2.138 | 5.82E-08 | NBL1      |
| ENSG00000207704 | -2.136 | 2.47E-03 | MIR548D1  |
| ENSG00000213005 | -2.131 | 5.25E-03 | PTTG3P    |
| ENSG00000010319 | -2.126 | 5.71E-04 | SEMA3G    |

|                 |        |          |           |
|-----------------|--------|----------|-----------|
| ENSG00000232386 | -2.124 | 2.70E-03 | NA        |
| ENSG00000237556 | -2.124 | 6.86E-05 | KCND3-AS1 |
| ENSG00000128274 | -2.117 | 1.56E-03 | A4GALT    |
| ENSG00000227973 | -2.114 | 2.89E-03 | NA        |
| ENSG00000235301 | -2.100 | 3.44E-04 | NA        |
| ENSG00000197149 | -2.095 | 4.37E-03 | NA        |
| ENSG00000109610 | -2.087 | 5.79E-03 | SOD3      |
| ENSG00000076716 | -2.078 | 1.10E-05 | GPC4      |
| ENSG00000173926 | -2.076 | 3.59E-05 | MARC3     |
| ENSG00000006788 | -2.071 | 6.21E-03 | MYH13     |
| ENSG00000164211 | -2.057 | 1.10E-05 | STARD4    |
| ENSG00000231373 | -2.053 | 3.83E-03 | GNA14-AS1 |
| ENSG00000131435 | -2.052 | 7.85E-04 | PDLIM4    |
| ENSG00000164220 | -2.047 | 2.90E-06 | F2RL2     |
| ENSG00000230749 | -2.046 | 3.60E-03 | MEIS1-AS2 |
| ENSG00000163009 | -2.043 | 1.27E-03 | NA        |
| ENSG00000112769 | -2.042 | 9.27E-06 | LAMA4     |
| ENSG00000137259 | -2.038 | 3.02E-05 | NA        |
| ENSG00000105717 | -2.026 | 4.95E-03 | PBX4      |
| ENSG00000186047 | -2.021 | 4.84E-03 | DLEU7     |
| ENSG00000225708 | -2.017 | 3.79E-05 | NA        |
| ENSG00000170579 | -2.005 | 1.53E-05 | DLGAP1    |
| ENSG00000059377 | -2.002 | 7.73E-09 | TBXAS1    |
| ENSG00000179487 | -2.000 | 4.56E-03 | NA        |
| ENSG00000228056 | -1.999 | 1.10E-03 | NA        |
| ENSG00000188488 | -1.996 | 7.71E-03 | SERPINA5  |
| ENSG00000201467 | -1.996 | 2.73E-03 | NA        |
| ENSG00000232872 | -1.993 | 6.45E-04 | NA        |
| ENSG00000142798 | -1.991 | 4.78E-12 | HSPG2     |
| ENSG00000070882 | -1.988 | 9.51E-09 | OSBPL3    |
| ENSG00000068078 | -1.984 | 1.63E-08 | FGFR3     |
| ENSG00000136378 | -1.982 | 4.80E-04 | ADAMTS7   |
| ENSG00000228613 | -1.976 | 3.05E-06 | NA        |
| ENSG00000154640 | -1.973 | 1.82E-08 | BTG3      |
| ENSG00000231440 | -1.964 | 5.99E-03 | NA        |
| ENSG00000187123 | -1.961 | 6.76E-06 | LYPD6     |
| ENSG00000109452 | -1.952 | 6.22E-04 | INPP4B    |
| ENSG00000197588 | -1.949 | 4.18E-06 | KLKP1     |
| ENSG00000152284 | -1.949 | 4.99E-03 | TCF7L1    |

|                 |        |          |              |
|-----------------|--------|----------|--------------|
| ENSG00000152894 | -1.947 | 1.28E-09 | PTPRK        |
| ENSG00000168077 | -1.946 | 3.13E-04 | SCARA3       |
| ENSG00000095303 | -1.944 | 1.30E-06 | PTGS1        |
| ENSG00000115738 | -1.944 | 1.62E-07 | ID2          |
| ENSG00000114790 | -1.940 | 1.88E-09 | ARHGEF26     |
| ENSG00000145703 | -1.924 | 2.84E-09 | IQGAP2       |
| ENSG00000196091 | -1.924 | 3.65E-07 | MYBPC1       |
| ENSG00000197083 | -1.921 | 2.35E-05 | NA           |
| ENSG00000176366 | -1.914 | 2.52E-03 | NA           |
| ENSG00000074966 | -1.913 | 8.51E-03 | TXK          |
| ENSG00000175745 | -1.909 | 3.10E-03 | NR2F1        |
| ENSG00000182611 | -1.908 | 3.71E-05 | NA           |
| ENSG00000207082 | -1.907 | 2.14E-03 | NA           |
| ENSG00000220771 | -1.895 | 2.44E-03 | NA           |
| ENSG00000224973 | -1.894 | 5.04E-04 | LARGE-AS1    |
| ENSG00000170011 | -1.893 | 3.17E-09 | MYRIP        |
| ENSG00000143995 | -1.891 | 4.33E-08 | MEIS1        |
| ENSG00000162733 | -1.888 | 3.20E-06 | DDR2         |
| ENSG00000225479 | -1.885 | 1.21E-04 | PLCB1-IT1    |
| ENSG00000233496 | -1.884 | 7.09E-03 | SYNJ2-IT1    |
| ENSG00000059804 | -1.880 | 4.97E-06 | SLC2A3       |
| ENSG00000233924 | -1.878 | 8.46E-03 | NA           |
| ENSG00000140945 | -1.877 | 2.01E-03 | CDH13        |
| ENSG00000225805 | -1.877 | 6.17E-03 | LOC100129216 |
| ENSG00000111664 | -1.876 | 4.38E-05 | GNB3         |
| ENSG00000197301 | -1.876 | 3.27E-03 | LOC100129940 |
| ENSG00000141098 | -1.872 | 5.10E-09 | GFOD2        |
| ENSG00000177076 | -1.871 | 2.80E-06 | ACER2        |
| ENSG00000182621 | -1.868 | 1.44E-09 | PLCB1        |
| ENSG00000188921 | -1.861 | 1.39E-04 | HACD4        |
| ENSG00000236467 | -1.860 | 2.43E-06 | KCNMA1-AS1   |
| ENSG00000121318 | -1.859 | 1.54E-03 | TAS2R10      |
| ENSG00000229323 | -1.858 | 8.14E-03 | DLEU1-AS1    |
| ENSG00000196747 | -1.855 | 2.89E-07 | HIST1H2AI    |
| ENSG00000226911 | -1.855 | 1.90E-04 | NA           |
| ENSG00000229857 | -1.853 | 5.79E-03 | NA           |
| ENSG00000135362 | -1.852 | 1.51E-04 | PRR5L        |
| ENSG00000131981 | -1.851 | 7.52E-04 | LGALS3       |
| ENSG00000165197 | -1.850 | 8.81E-03 | VEGFD        |

|                 |        |          |           |
|-----------------|--------|----------|-----------|
| ENSG00000132429 | -1.847 | 2.34E-03 | POPDC3    |
| ENSG00000026652 | -1.847 | 8.31E-07 | AGPAT4    |
| ENSG00000172867 | -1.843 | 6.86E-03 | KRT2      |
| ENSG00000163629 | -1.836 | 6.47E-10 | PTPN13    |
| ENSG00000238290 | -1.833 | 1.74E-03 | NA        |
| ENSG00000067715 | -1.833 | 8.87E-04 | SYT1      |
| ENSG00000023839 | -1.823 | 4.28E-03 | ABCC2     |
| ENSG00000196374 | -1.820 | 2.31E-05 | NA        |
| ENSG00000235482 | -1.817 | 4.20E-03 | NA        |
| ENSG00000172014 | -1.814 | 5.30E-03 | ANKRD20A4 |
| ENSG00000164946 | -1.806 | 3.02E-07 | FREM1     |
| ENSG00000174804 | -1.803 | 4.58E-09 | FZD4      |
| ENSG00000148400 | -1.800 | 1.65E-07 | NOTCH1    |
| ENSG00000228485 | -1.793 | 1.64E-03 | NA        |
| ENSG00000182179 | -1.792 | 6.57E-04 | UBA7      |
| ENSG00000228916 | -1.790 | 1.12E-03 | NA        |
| ENSG00000203813 | -1.787 | 3.70E-07 | NA        |
| ENSG00000136383 | -1.785 | 7.05E-09 | ALPK3     |
| ENSG00000232037 | -1.774 | 2.68E-03 | NA        |
| ENSG00000117791 | -1.773 | 3.04E-06 | MARC2     |
| ENSG00000148737 | -1.772 | 2.04E-06 | TCF7L2    |
| ENSG00000230314 | -1.772 | 9.02E-03 | NA        |
| ENSG00000221510 | -1.766 | 7.34E-03 | MIR5480   |
| ENSG00000128294 | -1.765 | 4.22E-05 | TPST2     |
| ENSG00000134762 | -1.764 | 1.21E-09 | DSC3      |
| ENSG00000011422 | -1.760 | 2.57E-03 | PLAUR     |
| ENSG00000128253 | -1.747 | 4.63E-06 | RFPL2     |
| ENSG00000106541 | -1.739 | 9.44E-08 | AGR2      |
| ENSG00000119514 | -1.737 | 8.45E-06 | GALNT12   |
| ENSG00000199933 | -1.732 | 1.32E-04 | NA        |
| ENSG00000136237 | -1.732 | 1.24E-07 | RAPGEF5   |
| ENSG00000232906 | -1.730 | 4.09E-03 | NA        |
| ENSG00000090269 | -1.724 | 1.82E-03 | NA        |
| ENSG00000188848 | -1.722 | 6.27E-09 | BEND4     |
| ENSG00000230326 | -1.717 | 5.68E-03 | NA        |
| ENSG00000112706 | -1.716 | 7.79E-06 | IMPG1     |
| ENSG00000203289 | -1.714 | 8.58E-05 | NA        |
| ENSG00000173467 | -1.710 | 8.82E-03 | AGR3      |
| ENSG00000206762 | -1.709 | 5.51E-04 | NA        |



|                 |        |          |             |
|-----------------|--------|----------|-------------|
| ENSG00000060138 | -1.702 | 1.05E-10 | YBX3        |
| ENSG00000238922 | -1.700 | 7.34E-03 | NA          |
| ENSG00000138646 | -1.699 | 4.35E-05 | HERC5       |
| ENSG00000207197 | -1.697 | 5.67E-03 | SNORD116-12 |
| ENSG00000156535 | -1.680 | 2.19E-04 | CD109       |
| ENSG00000234718 | -1.679 | 3.44E-03 | NA          |
| ENSG00000228729 | -1.674 | 8.31E-03 | NA          |
| ENSG00000149571 | -1.673 | 3.69E-03 | KIRREL3     |
| ENSG00000172296 | -1.672 | 2.64E-05 | SPTLC3      |
| ENSG00000185905 | -1.666 | 2.57E-04 | C16orf54    |
| ENSG00000133962 | -1.662 | 7.04E-04 | CATSPERB    |
| ENSG00000232270 | -1.661 | 2.10E-04 | NA          |
| ENSG00000099958 | -1.661 | 1.96E-05 | DERL3       |
| ENSG00000232909 | -1.659 | 2.99E-05 | NA          |
| ENSG00000171877 | -1.658 | 2.38E-06 | FRMD5       |
| ENSG00000148123 | -1.657 | 1.62E-05 | PLPPR1      |
| ENSG00000172123 | -1.656 | 1.67E-03 | SLFN12      |
| ENSG00000125257 | -1.655 | 3.21E-11 | ABCC4       |
| ENSG00000155926 | -1.651 | 3.64E-03 | SLA         |
| ENSG00000185669 | -1.649 | 8.75E-03 | SNAI3       |
| ENSG00000138641 | -1.647 | 1.76E-09 | HERC3       |
| ENSG00000135127 | -1.646 | 5.89E-09 | BICDL1      |
| ENSG00000136872 | -1.641 | 8.41E-03 | ALDOB       |
| ENSG00000133424 | -1.636 | 3.03E-05 | LARGE1      |
| ENSG00000151503 | -1.628 | 3.66E-11 | NCAPD3      |
| ENSG00000133138 | -1.626 | 5.38E-03 | TBC1D8B     |
| ENSG00000181877 | -1.616 | 2.72E-05 | NA          |
| ENSG00000166147 | -1.616 | 1.38E-05 | FBN1        |
| ENSG00000238888 | -1.610 | 4.69E-04 | NA          |
| ENSG00000232847 | -1.608 | 6.36E-03 | NA          |
| ENSG00000179087 | -1.607 | 7.59E-04 | NA          |
| ENSG00000197846 | -1.606 | 1.03E-05 | NA          |
| ENSG00000219073 | -1.600 | 4.28E-03 | CELA3B      |
| ENSG00000229160 | -1.596 | 6.87E-03 | NA          |
| ENSG00000215549 | -1.577 | 7.65E-04 | NA          |
| ENSG00000113083 | -1.573 | 4.35E-05 | LOX         |
| ENSG00000107821 | -1.568 | 1.16E-05 | KAZALD1     |
| ENSG00000165424 | -1.566 | 1.98E-04 | ZCCHC24     |
| ENSG00000213809 | -1.563 | 5.06E-03 | KLRK1       |

|                 |        |          |              |
|-----------------|--------|----------|--------------|
| ENSG00000183960 | -1.562 | 2.93E-07 | KCNH8        |
| ENSG00000111110 | -1.560 | 1.80E-10 | PPM1H        |
| ENSG00000016402 | -1.554 | 9.58E-07 | IL20RA       |
| ENSG00000155629 | -1.553 | 1.94E-08 | PIK3AP1      |
| ENSG00000155368 | -1.553 | 3.00E-07 | DBI          |
| ENSG00000227237 | -1.545 | 6.06E-03 | NA           |
| ENSG00000151718 | -1.542 | 2.99E-08 | WWC2         |
| ENSG00000238105 | -1.541 | 5.64E-04 | GOLGA2P5     |
| ENSG00000117143 | -1.541 | 1.19E-09 | UAP1         |
| ENSG00000128617 | -1.541 | 1.36E-03 | OPN1SW       |
| ENSG00000187951 | -1.536 | 1.49E-06 | ARHGAP11B    |
| ENSG00000129675 | -1.534 | 2.83E-05 | ARHGEF6      |
| ENSG00000175175 | -1.529 | 2.46E-08 | PPM1E        |
| ENSG00000212332 | -1.527 | 7.42E-03 | NA           |
| ENSG00000117519 | -1.525 | 1.65E-06 | CNN3         |
| ENSG00000182319 | -1.524 | 6.25E-05 | NA           |
| ENSG00000156381 | -1.523 | 1.39E-05 | ANKRD9       |
| ENSG00000173482 | -1.520 | 2.72E-06 | PTPRM        |
| ENSG00000225258 | -1.517 | 1.11E-03 | NA           |
| ENSG00000226015 | -1.516 | 9.34E-03 | NA           |
| ENSG00000225112 | -1.514 | 2.00E-03 | NA           |
| ENSG00000223865 | -1.511 | 3.59E-04 | HLA-DPB1     |
| ENSG00000138061 | -1.509 | 3.18E-09 | CYP1B1       |
| ENSG00000229764 | -1.507 | 5.13E-03 | NA           |
| ENSG00000185686 | -1.506 | 5.05E-05 | PRAME        |
| ENSG00000184270 | -1.505 | 1.71E-04 | HIST2H2AB    |
| ENSG00000052126 | -1.503 | 4.80E-08 | PLEKHA5      |
| ENSG00000143416 | -1.498 | 3.86E-07 | SELENBP1     |
| ENSG00000167371 | -1.498 | 1.46E-08 | PRRT2        |
| ENSG00000131153 | -1.495 | 6.45E-05 | GINS2        |
| ENSG00000154134 | -1.495 | 8.60E-05 | ROBO3        |
| ENSG00000089356 | -1.486 | 1.75E-05 | FXVD3        |
| ENSG00000197461 | -1.484 | 7.69E-07 | PDGFA        |
| ENSG00000171943 | -1.483 | 1.20E-03 | SRGAP2C      |
| ENSG00000235322 | -1.482 | 8.68E-03 | NA           |
| ENSG00000231259 | -1.477 | 3.69E-04 | NA           |
| ENSG00000226272 | -1.476 | 6.96E-04 | ARHGAP26-AS1 |
| ENSG00000100162 | -1.476 | 4.19E-05 | CENPM        |
| ENSG00000136720 | -1.472 | 7.58E-08 | HS6ST1       |

|                 |        |          |            |
|-----------------|--------|----------|------------|
| ENSG00000134470 | -1.465 | 1.24E-04 | IL15RA     |
| ENSG00000232978 | -1.463 | 2.35E-03 | NA         |
| ENSG00000228828 | -1.462 | 1.32E-04 | NA         |
| ENSG00000125398 | -1.461 | 5.05E-07 | SOX9       |
| ENSG00000232103 | -1.460 | 2.15E-03 | NA         |
| ENSG00000137404 | -1.460 | 2.94E-03 | NRM        |
| ENSG00000198947 | -1.455 | 5.10E-04 | DMD        |
| ENSG00000105219 | -1.454 | 1.80E-04 | CNTD2      |
| ENSG00000126016 | -1.450 | 1.50E-03 | AMOT       |
| ENSG00000213830 | -1.448 | 4.95E-03 | NA         |
| ENSG00000112343 | -1.442 | 1.44E-06 | TRIM38     |
| ENSG00000150893 | -1.441 | 5.71E-07 | FREM2      |
| ENSG00000235748 | -1.441 | 8.37E-03 | NA         |
| ENSG00000149798 | -1.437 | 2.03E-08 | CDC42EP2   |
| ENSG00000103056 | -1.437 | 3.06E-09 | SMPD3      |
| ENSG00000237805 | -1.436 | 7.96E-03 | NA         |
| ENSG00000185811 | -1.435 | 4.97E-08 | IKZF1      |
| ENSG00000105048 | -1.434 | 1.57E-03 | TNNT1      |
| ENSG00000010278 | -1.434 | 1.72E-08 | CD9        |
| ENSG00000231174 | -1.431 | 1.40E-05 | NA         |
| ENSG00000225497 | -1.430 | 4.90E-04 | KCNMA1-AS2 |
| ENSG00000123374 | -1.424 | 1.45E-06 | CDK2       |
| ENSG00000142677 | -1.424 | 6.49E-03 | IL22RA1    |
| ENSG00000125538 | -1.422 | 1.81E-03 | IL1B       |
| ENSG00000136842 | -1.420 | 9.58E-03 | TMOD1      |
| ENSG00000196176 | -1.420 | 2.41E-05 | NA         |
| ENSG00000144395 | -1.419 | 1.12E-04 | CCDC150    |
| ENSG00000185928 | -1.416 | 9.13E-09 | NA         |
| ENSG00000121621 | -1.416 | 5.82E-05 | KIF18A     |
| ENSG00000153246 | -1.414 | 1.09E-05 | PLA2R1     |
| ENSG00000231437 | -1.411 | 5.79E-04 | NA         |
| ENSG00000157613 | -1.408 | 2.58E-06 | CREB3L1    |
| ENSG00000069399 | -1.401 | 7.84E-06 | BCL3       |
| ENSG00000153208 | -1.397 | 1.77E-07 | MERTK      |
| ENSG00000089505 | -1.397 | 1.61E-03 | CMTM1      |
| ENSG00000121858 | -1.397 | 9.78E-06 | TNFSF10    |
| ENSG00000102878 | -1.397 | 2.84E-07 | HSF4       |
| ENSG00000080709 | -1.395 | 1.99E-06 | KCNN2      |
| ENSG00000186921 | -1.395 | 2.46E-03 | NA         |

|                 |        |          |              |
|-----------------|--------|----------|--------------|
| ENSG00000180353 | -1.393 | 5.02E-04 | HCLS1        |
| ENSG00000200882 | -1.388 | 2.39E-03 | NA           |
| ENSG00000155850 | -1.383 | 8.52E-10 | SLC26A2      |
| ENSG00000037280 | -1.377 | 4.31E-03 | FLT4         |
| ENSG00000064666 | -1.373 | 3.85E-04 | CNN2         |
| ENSG00000197496 | -1.372 | 3.00E-05 | SLC2A10      |
| ENSG00000227013 | -1.371 | 7.90E-03 | NA           |
| ENSG00000182572 | -1.369 | 8.07E-06 | NA           |
| ENSG00000234229 | -1.369 | 7.34E-03 | NA           |
| ENSG00000222641 | -1.368 | 7.09E-03 | NA           |
| ENSG00000134940 | -1.368 | 5.60E-05 | ACRV1        |
| ENSG00000167751 | -1.367 | 5.68E-09 | KLK2         |
| ENSG00000230789 | -1.366 | 3.68E-03 | ARHGAP26-IT1 |
| ENSG00000229874 | -1.365 | 7.73E-04 | NA           |
| ENSG00000139734 | -1.363 | 1.08E-05 | DIAPH3       |
| ENSG00000222575 | -1.360 | 2.17E-03 | NA           |
| ENSG00000077782 | -1.358 | 2.87E-09 | FGFR1        |
| ENSG00000214826 | -1.357 | 3.84E-08 | NA           |
| ENSG00000065357 | -1.357 | 1.77E-04 | DGKA         |
| ENSG00000166845 | -1.353 | 1.04E-04 | C18orf54     |
| ENSG00000072571 | -1.352 | 3.08E-05 | HMMR         |
| ENSG00000123219 | -1.351 | 5.50E-06 | CENPK        |
| ENSG00000207727 | -1.349 | 4.23E-09 | NA           |
| ENSG00000196226 | -1.349 | 7.49E-04 | NA           |
| ENSG00000074370 | -1.349 | 4.23E-08 | ATP2A3       |
| ENSG00000186611 | -1.349 | 3.71E-03 | NA           |
| ENSG00000213352 | -1.349 | 2.89E-03 | NA           |
| ENSG00000198558 | -1.345 | 8.86E-05 | NA           |
| ENSG00000222128 | -1.342 | 8.96E-03 | NA           |
| ENSG00000187243 | -1.341 | 9.99E-03 | MAGED4B      |
| ENSG00000152076 | -1.336 | 3.36E-04 | CCDC74B      |
| ENSG00000167900 | -1.333 | 1.15E-07 | TK1          |
| ENSG00000234873 | -1.332 | 3.78E-03 | NA           |
| ENSG00000157911 | -1.332 | 3.36E-07 | PEX10        |
| ENSG00000156284 | -1.332 | 6.39E-06 | CLDN8        |
| ENSG00000217555 | -1.331 | 5.72E-06 | CKLF         |
| ENSG00000158201 | -1.331 | 2.29E-03 | ABHD3        |
| ENSG00000163072 | -1.329 | 3.22E-05 | NOSTRIN      |
| ENSG00000229721 | -1.328 | 7.88E-03 | NA           |

|                 |        |          |          |
|-----------------|--------|----------|----------|
| ENSG00000154856 | -1.325 | 3.29E-03 | APCDD1   |
| ENSG00000180875 | -1.325 | 1.60E-03 | GREM2    |
| ENSG00000183049 | -1.324 | 4.14E-08 | CAMK1D   |
| ENSG00000169306 | -1.320 | 1.52E-03 | IL1RAPL1 |
| ENSG00000106462 | -1.318 | 1.34E-07 | EZH2     |
| ENSG00000111846 | -1.317 | 9.83E-05 | GCNT2    |
| ENSG00000162591 | -1.317 | 1.35E-07 | MEGF6    |
| ENSG00000154479 | -1.314 | 5.76E-03 | CCDC173  |
| ENSG00000119640 | -1.311 | 2.50E-04 | ACYP1    |
| ENSG00000187676 | -1.308 | 1.28E-04 | B3GLCT   |
| ENSG00000146410 | -1.306 | 6.13E-03 | MTFR2    |
| ENSG00000236283 | -1.303 | 9.15E-03 | NA       |
| ENSG00000151632 | -1.302 | 8.47E-03 | AKR1C2   |
| ENSG00000064651 | -1.301 | 1.03E-07 | SLC12A2  |
| ENSG00000182718 | -1.301 | 1.87E-04 | ANXA2    |
| ENSG00000204128 | -1.300 | 5.05E-03 | C2orf72  |
| ENSG00000168394 | -1.294 | 1.82E-03 | TAP1     |
| ENSG00000188290 | -1.294 | 1.01E-04 | HES4     |
| ENSG00000232934 | -1.292 | 2.62E-03 | NA       |
| ENSG00000233483 | -1.292 | 5.40E-04 | NA       |
| ENSG00000110080 | -1.291 | 4.37E-05 | ST3GAL4  |
| ENSG00000005189 | -1.291 | 4.83E-05 | LOC81691 |
| ENSG00000101447 | -1.288 | 8.10E-06 | FAM83D   |
| ENSG00000042781 | -1.285 | 2.24E-04 | USH2A    |
| ENSG00000112727 | -1.285 | 7.44E-05 | NA       |
| ENSG00000168016 | -1.285 | 1.35E-05 | TRANK1   |
| ENSG00000217195 | -1.284 | 8.00E-04 | NA       |
| ENSG00000131781 | -1.283 | 4.08E-04 | FMO5     |
| ENSG00000174469 | -1.281 | 9.94E-04 | CNTNAP2  |
| ENSG00000225192 | -1.280 | 7.43E-03 | NA       |
| ENSG00000034063 | -1.279 | 2.84E-06 | NA       |
| ENSG00000177283 | -1.278 | 1.40E-08 | FZD8     |
| ENSG00000095203 | -1.278 | 4.32E-08 | EPB41L4B |
| ENSG00000171747 | -1.274 | 5.12E-03 | LGALS4   |
| ENSG00000165304 | -1.272 | 5.27E-06 | MELK     |
| ENSG00000141664 | -1.272 | 6.52E-08 | ZCCHC2   |
| ENSG00000110171 | -1.271 | 5.89E-07 | TRIM3    |
| ENSG00000141401 | -1.271 | 2.51E-04 | IMPA2    |
| ENSG00000105784 | -1.270 | 2.28E-05 | RUNDC3B  |

|                 |        |          |           |
|-----------------|--------|----------|-----------|
| ENSG00000197409 | -1.266 | 1.81E-05 | HIST1H3D  |
| ENSG00000234193 | -1.265 | 8.00E-05 | NA        |
| ENSG00000067601 | -1.263 | 1.72E-03 | NA        |
| ENSG00000187741 | -1.262 | 1.18E-06 | FANCA     |
| ENSG00000233346 | -1.260 | 5.92E-03 | NA        |
| ENSG00000115267 | -1.259 | 9.87E-05 | IFIH1     |
| ENSG00000085999 | -1.259 | 5.70E-07 | RAD54L    |
| ENSG00000140931 | -1.258 | 3.97E-07 | CMTM3     |
| ENSG00000080644 | -1.257 | 7.09E-03 | CHRNA3    |
| ENSG00000104332 | -1.257 | 2.92E-05 | SFRP1     |
| ENSG00000198374 | -1.257 | 8.68E-03 | NA        |
| ENSG00000100297 | -1.256 | 1.04E-06 | MCM5      |
| ENSG00000164308 | -1.256 | 1.57E-05 | ERAP2     |
| ENSG00000136883 | -1.253 | 4.64E-08 | KIF12     |
| ENSG00000122863 | -1.251 | 5.26E-05 | CHST3     |
| ENSG00000093009 | -1.249 | 2.55E-06 | CDC45     |
| ENSG00000171241 | -1.247 | 2.57E-04 | SHCBP1    |
| ENSG00000184384 | -1.247 | 1.16E-03 | MAML2     |
| ENSG00000106571 | -1.246 | 3.09E-03 | GLI3      |
| ENSG00000132204 | -1.246 | 1.07E-03 | NA        |
| ENSG00000166833 | -1.245 | 1.58E-07 | NAV2      |
| ENSG00000065534 | -1.243 | 7.40E-06 | MYLK      |
| ENSG00000125844 | -1.242 | 2.22E-07 | RRBP1     |
| ENSG00000185483 | -1.241 | 2.07E-05 | ROR1      |
| ENSG00000130508 | -1.241 | 6.94E-09 | PXDN      |
| ENSG00000071205 | -1.241 | 3.14E-04 | ARHGAP10  |
| ENSG00000184925 | -1.239 | 4.28E-04 | LCN12     |
| ENSG00000163040 | -1.238 | 1.87E-05 | CCDC74A   |
| ENSG00000160336 | -1.238 | 6.32E-10 | ZNF761    |
| ENSG00000185130 | -1.238 | 5.53E-03 | HIST1H2BL |
| ENSG00000162390 | -1.237 | 1.47E-03 | ACOT11    |
| ENSG00000010327 | -1.236 | 1.29E-03 | STAB1     |
| ENSG00000035499 | -1.235 | 2.38E-05 | DEPDC1B   |
| ENSG00000236213 | -1.235 | 4.62E-03 | NA        |
| ENSG00000177460 | -1.232 | 1.00E-02 | NA        |
| ENSG00000103222 | -1.232 | 2.88E-07 | ABCC1     |
| ENSG00000225700 | -1.232 | 8.27E-05 | NA        |
| ENSG00000125434 | -1.231 | 6.44E-03 | SLC25A35  |
| ENSG00000007372 | -1.231 | 7.03E-04 | PAX6      |

|                 |        |          |            |
|-----------------|--------|----------|------------|
| ENSG00000204525 | -1.230 | 3.10E-03 | HLA-C      |
| ENSG00000051341 | -1.230 | 6.84E-06 | POLQ       |
| ENSG00000185480 | -1.230 | 3.32E-05 | PARPBP     |
| ENSG00000184445 | -1.229 | 1.07E-06 | KNTC1      |
| ENSG00000153179 | -1.228 | 9.24E-08 | RASSF3     |
| ENSG00000227331 | -1.228 | 6.00E-03 | NA         |
| ENSG00000171385 | -1.225 | 8.64E-07 | KCND3      |
| ENSG00000173269 | -1.223 | 5.29E-04 | MMRN2      |
| ENSG00000213376 | -1.223 | 4.46E-05 | NA         |
| ENSG00000119403 | -1.222 | 1.47E-07 | PHF19      |
| ENSG00000100526 | -1.221 | 2.31E-04 | CDKN3      |
| ENSG00000161905 | -1.217 | 1.77E-03 | ALOX15     |
| ENSG00000123384 | -1.217 | 1.77E-09 | LRP1       |
| ENSG00000163251 | -1.217 | 2.00E-07 | FZD5       |
| ENSG00000065618 | -1.214 | 1.12E-03 | COL17A1    |
| ENSG00000164330 | -1.214 | 2.02E-04 | EBF1       |
| ENSG00000134824 | -1.214 | 1.95E-04 | FADS2      |
| ENSG00000101057 | -1.214 | 3.42E-05 | MYBL2      |
| ENSG00000163239 | -1.214 | 4.26E-03 | TDRD10     |
| ENSG00000213347 | -1.212 | 1.53E-05 | MXD3       |
| ENSG00000160447 | -1.211 | 3.52E-03 | PKN3       |
| ENSG00000129173 | -1.211 | 1.66E-05 | E2F8       |
| ENSG00000196369 | -1.207 | 3.81E-05 | SRGAP2B    |
| ENSG00000138180 | -1.205 | 9.12E-05 | CEP55      |
| ENSG00000167508 | -1.205 | 1.01E-03 | MVD        |
| ENSG00000225652 | -1.205 | 4.40E-05 | NA         |
| ENSG00000232973 | -1.204 | 3.38E-04 | CYP1B1-AS1 |
| ENSG00000116690 | -1.202 | 6.15E-03 | PRG4       |
| ENSG00000165046 | -1.201 | 4.38E-04 | LETM2      |
| ENSG00000147536 | -1.199 | 1.51E-03 | GINS4      |
| ENSG00000178026 | -1.199 | 5.85E-06 | LRRC75B    |
| ENSG00000140545 | -1.199 | 8.31E-03 | MFGE8      |
| ENSG00000156113 | -1.198 | 2.60E-09 | KCNMA1     |
| ENSG00000125319 | -1.193 | 3.68E-05 | C17orf53   |
| ENSG00000147507 | -1.192 | 5.90E-05 | NA         |
| ENSG00000110169 | -1.189 | 5.89E-04 | HPX        |
| ENSG00000110719 | -1.189 | 4.11E-06 | TCIRG1     |
| ENSG00000180803 | -1.189 | 9.38E-03 | NA         |
| ENSG00000122966 | -1.187 | 6.03E-07 | CIT        |

|                 |        |          |            |
|-----------------|--------|----------|------------|
| ENSG00000111490 | -1.185 | 5.55E-07 | TBC1D30    |
| ENSG00000182185 | -1.184 | 1.28E-03 | RAD51B     |
| ENSG00000101412 | -1.183 | 2.79E-06 | E2F1       |
| ENSG00000082781 | -1.181 | 4.67E-07 | ITGB5      |
| ENSG00000111186 | -1.180 | 3.29E-03 | WNT5B      |
| ENSG00000137628 | -1.179 | 3.57E-03 | DDX60      |
| ENSG00000117650 | -1.179 | 1.16E-04 | NEK2       |
| ENSG00000226887 | -1.179 | 2.33E-03 | ERVMER34-1 |
| ENSG00000233224 | -1.178 | 3.53E-04 | NA         |
| ENSG00000128487 | -1.176 | 4.67E-07 | SPECC1     |
| ENSG00000105538 | -1.168 | 4.92E-03 | RASIP1     |
| ENSG00000233754 | -1.165 | 5.34E-04 | NA         |
| ENSG00000163833 | -1.164 | 1.68E-03 | FBXO40     |
| ENSG00000066279 | -1.163 | 6.32E-05 | ASPM       |
| ENSG00000124575 | -1.163 | 3.38E-06 | HIST1H1D   |
| ENSG00000198189 | -1.162 | 2.08E-06 | HSD17B11   |
| ENSG00000127564 | -1.162 | 6.63E-04 | PKMYT1     |
| ENSG00000135476 | -1.161 | 1.04E-06 | ESPL1      |
| ENSG00000211445 | -1.159 | 8.56E-06 | GPX3       |
| ENSG00000198056 | -1.156 | 2.56E-04 | PRIM1      |
| ENSG00000115758 | -1.155 | 1.55E-07 | ODC1       |
| ENSG00000177173 | -1.154 | 6.09E-03 | NA         |
| ENSG00000135540 | -1.154 | 5.78E-04 | NHSL1      |
| ENSG00000090975 | -1.154 | 8.70E-05 | PITPNM2    |
| ENSG00000117399 | -1.153 | 1.12E-04 | CDC20      |
| ENSG00000183856 | -1.153 | 6.03E-06 | IQGAP3     |
| ENSG00000231607 | -1.151 | 3.18E-05 | DLEU2      |
| ENSG00000213700 | -1.150 | 7.61E-03 | NA         |
| ENSG00000119771 | -1.150 | 3.26E-03 | KLHL29     |
| ENSG00000104903 | -1.149 | 8.19E-03 | LYL1       |
| ENSG00000176024 | -1.149 | 1.39E-08 | ZNF613     |
| ENSG00000154639 | -1.148 | 8.80E-08 | CXADR      |
| ENSG00000115705 | -1.147 | 1.99E-04 | TPO        |
| ENSG00000111666 | -1.146 | 4.88E-08 | CHPT1      |
| ENSG00000123983 | -1.146 | 2.74E-08 | ACSL3      |
| ENSG00000196532 | -1.143 | 1.47E-04 | NA         |
| ENSG00000144857 | -1.143 | 3.53E-05 | BOC        |
| ENSG00000186185 | -1.142 | 5.46E-06 | KIF18B     |
| ENSG00000076641 | -1.142 | 1.81E-05 | PAG1       |



|                 |        |          |         |
|-----------------|--------|----------|---------|
| ENSG00000154760 | -1.142 | 8.86E-07 | SLFN13  |
| ENSG00000105011 | -1.142 | 9.00E-05 | ASF1B   |
| ENSG00000149554 | -1.142 | 9.52E-06 | CHEK1   |
| ENSG00000124256 | -1.141 | 8.66E-03 | ZBP1    |
| ENSG00000171388 | -1.140 | 4.62E-05 | APLN    |
| ENSG00000160753 | -1.140 | 1.78E-06 | RUSC1   |
| ENSG00000138346 | -1.139 | 1.21E-05 | DNA2    |
| ENSG00000183558 | -1.138 | 6.35E-03 | NA      |
| ENSG00000096006 | -1.137 | 4.48E-05 | CRISP3  |
| ENSG00000164620 | -1.136 | 1.57E-05 | RELL2   |
| ENSG00000145014 | -1.135 | 1.38E-05 | TMEM44  |
| ENSG00000197619 | -1.135 | 4.88E-09 | ZNF615  |
| ENSG00000119943 | -1.132 | 3.99E-05 | PYROXD2 |
| ENSG00000158457 | -1.126 | 2.85E-04 | TSPAN33 |
| ENSG00000223855 | -1.125 | 7.98E-05 | HRAT92  |
| ENSG00000067955 | -1.122 | 5.57E-07 | CBFB    |
| ENSG00000185697 | -1.117 | 4.83E-03 | MYBL1   |
| ENSG00000065609 | -1.116 | 1.01E-05 | SNAP91  |
| ENSG00000234664 | -1.114 | 6.94E-03 | NA      |
| ENSG00000142731 | -1.114 | 1.23E-04 | PLK4    |
| ENSG00000168528 | -1.114 | 3.48E-05 | SERINC2 |
| ENSG00000106537 | -1.114 | 2.13E-07 | TSPAN13 |
| ENSG00000123473 | -1.113 | 1.75E-06 | STIL    |
| ENSG00000076864 | -1.113 | 1.04E-08 | RAP1GAP |
| ENSG00000225515 | -1.112 | 4.22E-03 | NA      |
| ENSG00000163352 | -1.110 | 1.66E-04 | LENEP   |
| ENSG00000198553 | -1.109 | 1.53E-04 | KCNRG   |
| ENSG00000094804 | -1.108 | 3.27E-04 | CDC6    |
| ENSG00000070540 | -1.106 | 6.19E-04 | WIPI1   |
| ENSG00000160957 | -1.104 | 8.93E-06 | RECQL4  |
| ENSG00000113231 | -1.103 | 2.15E-07 | PDE8B   |
| ENSG00000047188 | -1.100 | 3.36E-08 | YTHDC2  |
| ENSG00000109805 | -1.099 | 9.15E-05 | NCAPG   |
| ENSG00000182601 | -1.099 | 2.07E-04 | HS3ST4  |
| ENSG00000111788 | -1.098 | 1.48E-05 | NA      |
| ENSG00000108960 | -1.098 | 3.26E-05 | MMD     |
| ENSG00000215382 | -1.098 | 7.54E-03 | NA      |
| ENSG00000099282 | -1.096 | 9.93E-04 | TSPAN15 |
| ENSG00000173210 | -1.095 | 8.03E-06 | ABLIM3  |

|                 |        |          |          |
|-----------------|--------|----------|----------|
| ENSG00000188126 | -1.095 | 1.89E-05 | NA       |
| ENSG00000101255 | -1.095 | 1.05E-06 | TRIB3    |
| ENSG00000156140 | -1.093 | 1.21E-06 | ADAMTS3  |
| ENSG00000140525 | -1.092 | 1.33E-06 | FANCI    |
| ENSG00000104147 | -1.088 | 7.21E-04 | OIP5     |
| ENSG00000154040 | -1.087 | 1.65E-03 | CABYR    |
| ENSG00000103995 | -1.084 | 7.21E-05 | CEP152   |
| ENSG00000163535 | -1.084 | 3.96E-05 | SGO2     |
| ENSG00000234326 | -1.084 | 1.80E-04 | NA       |
| ENSG00000075218 | -1.083 | 1.14E-04 | GTSE1    |
| ENSG00000059378 | -1.082 | 5.75E-06 | PARP12   |
| ENSG00000132256 | -1.082 | 2.08E-04 | TRIM5    |
| ENSG00000111665 | -1.081 | 7.61E-04 | CDCA3    |
| ENSG00000197142 | -1.080 | 2.62E-06 | ACSL5    |
| ENSG00000165244 | -1.080 | 1.44E-04 | ZNF367   |
| ENSG00000235023 | -1.077 | 4.64E-05 | NA       |
| ENSG00000164171 | -1.077 | 9.85E-05 | ITGA2    |
| ENSG00000135451 | -1.075 | 5.12E-06 | TROAP    |
| ENSG00000092377 | -1.075 | 3.49E-05 | TBL1Y    |
| ENSG00000232324 | -1.072 | 2.83E-03 | NA       |
| ENSG00000008513 | -1.071 | 1.50E-03 | ST3GAL1  |
| ENSG00000156049 | -1.071 | 4.76E-04 | GNA14    |
| ENSG00000223507 | -1.071 | 4.82E-03 | NA       |
| ENSG00000043591 | -1.071 | 7.61E-06 | ADRB1    |
| ENSG00000178573 | -1.070 | 1.90E-03 | MAF      |
| ENSG00000111249 | -1.069 | 3.46E-06 | CUX2     |
| ENSG00000111845 | -1.068 | 3.40E-03 | PAK1IP1  |
| ENSG00000164105 | -1.068 | 1.01E-03 | SAP30    |
| ENSG00000186193 | -1.068 | 9.46E-07 | SAPCD2   |
| ENSG00000173442 | -1.067 | 3.23E-07 | EHBP1L1  |
| ENSG00000142513 | -1.066 | 8.25E-07 | ACPT     |
| ENSG00000207643 | -1.062 | 9.84E-03 | NA       |
| ENSG00000148671 | -1.061 | 4.92E-06 | ADIRF    |
| ENSG00000082196 | -1.060 | 8.56E-06 | C1QTNF3  |
| ENSG00000149485 | -1.060 | 4.75E-05 | FADS1    |
| ENSG00000105617 | -1.059 | 4.81E-03 | LENG1    |
| ENSG00000150540 | -1.059 | 1.46E-05 | HNMT     |
| ENSG00000111247 | -1.056 | 5.18E-05 | RAD51AP1 |
| ENSG00000221955 | -1.054 | 3.15E-06 | SLC12A8  |

|                 |        |          |         |
|-----------------|--------|----------|---------|
| ENSG00000156802 | -1.053 | 1.19E-06 | ATAD2   |
| ENSG00000038210 | -1.053 | 1.88E-04 | PI4K2B  |
| ENSG00000065328 | -1.051 | 8.42E-05 | MCM10   |
| ENSG00000163354 | -1.050 | 6.67E-03 | DCST2   |
| ENSG00000224208 | -1.050 | 1.51E-03 | NA      |
| ENSG00000228972 | -1.046 | 8.26E-03 | NA      |
| ENSG00000130164 | -1.046 | 7.91E-07 | LDLR    |
| ENSG00000119969 | -1.046 | 1.08E-05 | HELLS   |
| ENSG00000137807 | -1.044 | 8.88E-05 | KIF23   |
| ENSG00000176485 | -1.044 | 5.96E-06 | PLA2G16 |
| ENSG00000119326 | -1.044 | 1.61E-05 | CTNNAL1 |
| ENSG00000236274 | -1.039 | 3.44E-03 | NA      |
| ENSG00000224500 | -1.039 | 3.55E-03 | NA      |
| ENSG00000115008 | -1.039 | 1.96E-03 | IL1A    |
| ENSG00000198554 | -1.038 | 5.26E-06 | WDHD1   |
| ENSG00000179241 | -1.037 | 2.62E-07 | LDLRAD3 |
| ENSG00000163491 | -1.037 | 2.30E-03 | NEK10   |
| ENSG00000139351 | -1.036 | 1.08E-05 | SYCP3   |
| ENSG00000013810 | -1.035 | 1.09E-05 | TACC3   |
| ENSG00000126453 | -1.035 | 5.36E-03 | BCL2L12 |
| ENSG00000236942 | -1.034 | 3.43E-04 | NA      |
| ENSG00000131351 | -1.032 | 2.90E-04 | HAUS8   |
| ENSG00000054654 | -1.032 | 4.11E-07 | SYNE2   |
| ENSG00000103966 | -1.032 | 1.85E-03 | EHD4    |
| ENSG00000198945 | -1.032 | 9.37E-05 | L3MBTL3 |
| ENSG00000225855 | -1.030 | 3.73E-05 | NA      |
| ENSG00000135048 | -1.029 | 7.58E-07 | TMEM2   |
| ENSG00000166263 | -1.029 | 7.69E-06 | STXBP4  |
| ENSG00000167799 | -1.029 | 1.48E-03 | NUDT8   |
| ENSG00000102024 | -1.029 | 7.48E-03 | PLS3    |
| ENSG00000169860 | -1.027 | 1.38E-03 | P2RY1   |
| ENSG00000224121 | -1.027 | 4.38E-04 | NA      |
| ENSG00000109586 | -1.027 | 1.29E-07 | GALNT7  |
| ENSG00000156026 | -1.026 | 5.35E-04 | MCU     |
| ENSG00000184731 | -1.026 | 2.15E-05 | FAM110C |
| ENSG00000072864 | -1.026 | 4.38E-04 | NDE1    |
| ENSG00000160867 | -1.026 | 4.58E-03 | FGFR4   |
| ENSG00000141179 | -1.025 | 5.83E-05 | PCTP    |
| ENSG00000137834 | -1.025 | 2.90E-03 | SMAD6   |

|                 |        |          |           |
|-----------------|--------|----------|-----------|
| ENSG00000090889 | -1.024 | 3.27E-05 | KIF4A     |
| ENSG00000166002 | -1.023 | 2.90E-06 | SMCO4     |
| ENSG00000198873 | -1.022 | 2.25E-03 | GRK5      |
| ENSG00000124693 | -1.021 | 8.17E-05 | NA        |
| ENSG00000062822 | -1.020 | 1.59E-05 | POLD1     |
| ENSG00000184825 | -1.018 | 1.55E-04 | NA        |
| ENSG00000228768 | -1.017 | 4.39E-03 | MIR365B   |
| ENSG00000118513 | -1.017 | 2.12E-04 | MYB       |
| ENSG00000185420 | -1.015 | 4.63E-06 | SMYD3     |
| ENSG00000136169 | -1.015 | 7.75E-05 | SETDB2    |
| ENSG00000024526 | -1.014 | 9.76E-05 | DEPDC1    |
| ENSG00000215068 | -1.013 | 1.69E-04 | LOC153684 |
| ENSG00000146648 | -1.012 | 6.72E-06 | EGFR      |
| ENSG00000132016 | -1.011 | 9.82E-04 | C19orf57  |
| ENSG00000229715 | -1.009 | 3.56E-03 | NA        |
| ENSG00000160781 | -1.008 | 2.04E-04 | PAQR6     |
| ENSG00000196331 | -1.008 | 5.22E-04 | NA        |
| ENSG00000167670 | -1.007 | 4.59E-06 | CHAF1A    |
| ENSG00000112984 | -1.007 | 1.30E-05 | KIF20A    |
| ENSG00000196787 | -1.007 | 1.83E-05 | HIST1H2AG |
| ENSG00000184207 | -1.005 | 1.91E-04 | PGP       |
| ENSG00000149927 | -1.005 | 4.16E-03 | DOC2A     |
| ENSG00000104738 | -1.005 | 9.07E-06 | MCM4      |
| ENSG00000197299 | -1.004 | 5.58E-05 | BLM       |
| ENSG00000158402 | -1.004 | 8.67E-04 | CDC25C    |
| ENSG00000164104 | -1.002 | 2.67E-05 | HMGB2     |
| ENSG00000163249 | -1.002 | 3.28E-05 | CCNYL1    |
| ENSG00000169891 | -1.002 | 1.55E-05 | REPS2     |
| ENSG00000222201 | -1.001 | 2.79E-03 | NA        |
| ENSG00000187229 | -1.000 | 4.07E-03 | NA        |
| ENSG00000132669 | -1.000 | 4.30E-06 | RIN2      |
| ENSG00000231980 | -1.000 | 4.91E-05 | NA        |
| ENSG00000233822 | -0.999 | 1.18E-04 | HIST1H2BN |
| ENSG00000124191 | 0.999  | 9.37E-04 | TOX2      |
| ENSG00000104320 | 1.000  | 2.14E-06 | NBN       |
| ENSG00000124743 | 1.000  | 4.44E-03 | KLHL31    |
| ENSG00000087510 | 1.000  | 3.39E-03 | TFAP2C    |
| ENSG00000173258 | 1.002  | 8.68E-07 | ZNF483    |
| ENSG00000144597 | 1.004  | 3.97E-07 | EAF1      |

|                 |       |          |           |
|-----------------|-------|----------|-----------|
| ENSG00000204634 | 1.006 | 6.35E-06 | TBC1D8    |
| ENSG00000152518 | 1.011 | 1.56E-04 | ZFP36L2   |
| ENSG00000157064 | 1.012 | 5.04E-06 | NMNAT2    |
| ENSG00000206634 | 1.013 | 5.67E-03 | SNORA22   |
| ENSG00000106852 | 1.014 | 4.91E-03 | LHX6      |
| ENSG00000100605 | 1.015 | 5.99E-06 | ITPK1     |
| ENSG00000176927 | 1.017 | 6.95E-03 | EFCAB5    |
| ENSG00000133519 | 1.018 | 2.42E-04 | NA        |
| ENSG00000150750 | 1.020 | 8.42E-03 | C11orf53  |
| ENSG00000182957 | 1.021 | 4.53E-07 | SPATA13   |
| ENSG00000107819 | 1.021 | 2.52E-04 | SFXN3     |
| ENSG00000200156 | 1.022 | 2.67E-06 | RNU5B-1   |
| ENSG00000078487 | 1.023 | 1.22E-03 | ZCWPW1    |
| ENSG00000225572 | 1.024 | 7.06E-03 | DOCK4-AS1 |
| ENSG00000165655 | 1.024 | 2.11E-06 | ZNF503    |
| ENSG00000170616 | 1.025 | 2.04E-03 | NA        |
| ENSG00000234526 | 1.025 | 2.34E-03 | NA        |
| ENSG00000186577 | 1.025 | 9.93E-04 | C6orf1    |
| ENSG00000159403 | 1.025 | 9.77E-03 | C1R       |
| ENSG00000130294 | 1.026 | 2.02E-05 | KIF1A     |
| ENSG00000123240 | 1.027 | 6.65E-04 | OPTN      |
| ENSG00000206612 | 1.029 | 6.02E-03 | SNORA2A   |
| ENSG00000149483 | 1.029 | 3.53E-05 | TMEM138   |
| ENSG00000111912 | 1.030 | 1.35E-03 | NCOA7     |
| ENSG00000144655 | 1.030 | 2.11E-03 | CSRNP1    |
| ENSG00000092068 | 1.033 | 1.72E-03 | SLC7A8    |
| ENSG00000165659 | 1.033 | 2.23E-05 | NA        |
| ENSG00000213826 | 1.034 | 2.38E-03 | NA        |
| ENSG00000171533 | 1.034 | 8.11E-04 | MAP6      |
| ENSG00000177606 | 1.035 | 2.81E-06 | JUN       |
| ENSG00000151715 | 1.035 | 5.91E-07 | TMEM45B   |
| ENSG00000189337 | 1.036 | 3.33E-04 | KAZN      |
| ENSG00000224722 | 1.038 | 2.39E-04 | NA        |
| ENSG00000017260 | 1.039 | 6.45E-08 | ATP2C1    |
| ENSG00000146776 | 1.041 | 3.32E-05 | ATXN7L1   |
| ENSG00000055118 | 1.043 | 3.99E-05 | KCNH2     |
| ENSG00000199568 | 1.043 | 1.76E-05 | RNU5A-1   |
| ENSG00000132563 | 1.043 | 5.37E-03 | REEP2     |
| ENSG00000222413 | 1.046 | 8.74E-03 | NA        |

|                 |       |          |          |
|-----------------|-------|----------|----------|
| ENSG00000189212 | 1.049 | 2.69E-06 | NA       |
| ENSG00000140506 | 1.050 | 1.93E-04 | LMAN1L   |
| ENSG00000102048 | 1.053 | 3.35E-03 | ASB9     |
| ENSG00000120549 | 1.056 | 6.79E-08 | KIAA1217 |
| ENSG00000124496 | 1.061 | 3.56E-06 | TRERF1   |
| ENSG00000207445 | 1.063 | 1.92E-04 | SNORD15B |
| ENSG00000168824 | 1.064 | 4.75E-04 | NSG1     |
| ENSG00000137309 | 1.064 | 3.96E-06 | HMGA1    |
| ENSG00000139597 | 1.067 | 1.89E-06 | N4BP2L1  |
| ENSG00000196963 | 1.072 | 5.11E-06 | NA       |
| ENSG00000158161 | 1.072 | 6.18E-08 | EYA3     |
| ENSG00000005249 | 1.078 | 7.08E-05 | PRKAR2B  |
| ENSG00000101489 | 1.080 | 2.98E-03 | CELF4    |
| ENSG00000164488 | 1.080 | 7.54E-04 | DACT2    |
| ENSG00000137261 | 1.082 | 4.93E-05 | KIAA0319 |
| ENSG00000072954 | 1.086 | 3.01E-05 | TMEM38A  |
| ENSG00000213154 | 1.086 | 3.64E-03 | NA       |
| ENSG00000155816 | 1.089 | 7.69E-03 | FMN2     |
| ENSG00000171435 | 1.089 | 2.27E-06 | KSR2     |
| ENSG00000166006 | 1.091 | 1.00E-03 | KCNC2    |
| ENSG00000207233 | 1.093 | 5.32E-03 | SNORA37  |
| ENSG00000124215 | 1.094 | 1.55E-04 | CDH26    |
| ENSG00000150995 | 1.098 | 1.07E-07 | ITPR1    |
| ENSG00000233237 | 1.100 | 1.98E-04 | NA       |
| ENSG00000118690 | 1.100 | 1.51E-03 | ARMC2    |
| ENSG00000132405 | 1.101 | 3.22E-07 | TBC1D14  |
| ENSG00000170577 | 1.101 | 1.33E-03 | SIX2     |
| ENSG00000109572 | 1.104 | 3.20E-08 | CLCN3    |
| ENSG00000167749 | 1.107 | 3.38E-05 | KLK4     |
| ENSG00000020577 | 1.111 | 6.76E-05 | SAMD4A   |
| ENSG00000143473 | 1.111 | 9.04E-05 | KCNH1    |
| ENSG00000169884 | 1.112 | 3.71E-03 | WNT10B   |
| ENSG00000196139 | 1.112 | 9.80E-05 | AKR1C3   |
| ENSG00000111674 | 1.112 | 1.09E-03 | ENO2     |
| ENSG00000114541 | 1.114 | 2.68E-04 | FRMD4B   |
| ENSG00000049759 | 1.115 | 9.86E-08 | NEDD4L   |
| ENSG00000226763 | 1.118 | 1.21E-03 | SRRM5    |
| ENSG00000169756 | 1.118 | 4.63E-07 | LIMS1    |
| ENSG00000221716 | 1.120 | 5.85E-03 | SNORA11  |

|                 |       |          |          |
|-----------------|-------|----------|----------|
| ENSG00000091039 | 1.122 | 7.67E-08 | OSBPL8   |
| ENSG00000054356 | 1.126 | 2.04E-03 | PTPRN    |
| ENSG00000166979 | 1.126 | 5.39E-05 | EVA1C    |
| ENSG00000184489 | 1.127 | 3.64E-04 | PTP4A3   |
| ENSG00000201818 | 1.131 | 1.99E-03 | NA       |
| ENSG00000186377 | 1.134 | 9.86E-03 | CYP4X1   |
| ENSG00000187601 | 1.137 | 8.36E-04 | MAGEH1   |
| ENSG00000119866 | 1.137 | 1.99E-05 | BCL11A   |
| ENSG00000204805 | 1.140 | 1.68E-03 | NA       |
| ENSG00000158445 | 1.141 | 8.36E-05 | KCNB1    |
| ENSG00000207181 | 1.141 | 1.39E-03 | SNORA14B |
| ENSG00000173559 | 1.142 | 7.36E-03 | NABP1    |
| ENSG00000160712 | 1.142 | 1.01E-03 | IL6R     |
| ENSG00000103599 | 1.143 | 4.99E-05 | IQCH     |
| ENSG00000014257 | 1.146 | 3.25E-07 | ACPP     |
| ENSG00000198846 | 1.147 | 3.63E-04 | TOX      |
| ENSG00000228832 | 1.148 | 4.72E-03 | NA       |
| ENSG00000200959 | 1.151 | 5.87E-07 | SNORA74A |
| ENSG00000100321 | 1.157 | 1.94E-04 | SYNGR1   |
| ENSG00000183837 | 1.158 | 2.54E-05 | PNMA3    |
| ENSG00000221491 | 1.161 | 1.18E-04 | SNORA2C  |
| ENSG00000066735 | 1.165 | 3.40E-04 | KIF26A   |
| ENSG00000138079 | 1.167 | 6.62E-04 | SLC3A1   |
| ENSG00000126562 | 1.168 | 3.56E-04 | WNK4     |
| ENSG00000100647 | 1.169 | 5.18E-06 | SUSD6    |
| ENSG00000164076 | 1.170 | 5.46E-05 | CAMKV    |
| ENSG00000139209 | 1.170 | 1.63E-03 | SLC38A4  |
| ENSG00000164125 | 1.170 | 4.05E-07 | FAM198B  |
| ENSG00000070087 | 1.171 | 7.63E-07 | PFN2     |
| ENSG00000132141 | 1.174 | 5.30E-04 | CCT6B    |
| ENSG00000172819 | 1.178 | 2.67E-03 | RARG     |
| ENSG00000212351 | 1.178 | 9.74E-04 | NA       |
| ENSG00000130813 | 1.180 | 5.84E-03 | C19orf66 |
| ENSG00000212719 | 1.180 | 5.44E-03 | C17orf51 |
| ENSG00000120322 | 1.182 | 4.46E-05 | PCDHB8   |
| ENSG00000152669 | 1.186 | 2.93E-03 | CCNO     |
| ENSG00000111275 | 1.187 | 7.01E-06 | ALDH2    |
| ENSG00000149809 | 1.188 | 2.64E-07 | TM7SF2   |
| ENSG00000008256 | 1.189 | 2.34E-07 | CYTH3    |

|                 |       |          |          |
|-----------------|-------|----------|----------|
| ENSG00000165125 | 1.189 | 3.55E-05 | TRPV6    |
| ENSG00000075426 | 1.190 | 5.52E-07 | FOSL2    |
| ENSG00000207315 | 1.191 | 8.59E-04 | NA       |
| ENSG00000116396 | 1.192 | 6.86E-07 | KCNC4    |
| ENSG00000233305 | 1.192 | 6.60E-03 | NA       |
| ENSG00000176401 | 1.194 | 1.56E-03 | EID2B    |
| ENSG00000176771 | 1.194 | 2.80E-05 | NCKAP5   |
| ENSG00000076706 | 1.197 | 1.04E-03 | MCAM     |
| ENSG00000157734 | 1.198 | 1.55E-05 | SNX22    |
| ENSG00000050438 | 1.199 | 6.17E-03 | SLC4A8   |
| ENSG00000110042 | 1.199 | 2.94E-03 | DTX4     |
| ENSG00000163631 | 1.199 | 4.20E-03 | ALB      |
| ENSG00000181264 | 1.201 | 7.89E-07 | TMEM136  |
| ENSG00000091656 | 1.201 | 6.77E-09 | ZFHX4    |
| ENSG00000203778 | 1.204 | 4.79E-03 | FAM229B  |
| ENSG00000163531 | 1.205 | 2.17E-07 | NFASC    |
| ENSG00000154229 | 1.208 | 3.35E-08 | PRKCA    |
| ENSG00000166670 | 1.208 | 2.33E-03 | MMP10    |
| ENSG00000109790 | 1.209 | 9.61E-05 | KLHL5    |
| ENSG00000020181 | 1.209 | 1.26E-03 | ADGRA2   |
| ENSG00000050030 | 1.210 | 3.42E-03 | KIAA2022 |
| ENSG00000103187 | 1.213 | 6.41E-07 | COTL1    |
| ENSG00000212402 | 1.214 | 4.08E-05 | SNORA74B |
| ENSG00000184986 | 1.215 | 7.27E-03 | TMEM121  |
| ENSG00000166710 | 1.217 | 9.41E-06 | B2M      |
| ENSG00000104290 | 1.217 | 3.69E-05 | FZD3     |
| ENSG00000208892 | 1.218 | 1.47E-04 | SNORA49  |
| ENSG00000140470 | 1.219 | 5.19E-03 | ADAMTS17 |
| ENSG00000144891 | 1.219 | 6.57E-03 | AGTR1    |
| ENSG00000118985 | 1.220 | 2.78E-06 | ELL2     |
| ENSG00000176595 | 1.223 | 8.72E-08 | KBTBD11  |
| ENSG00000164038 | 1.223 | 2.38E-03 | SLC9B2   |
| ENSG00000047648 | 1.225 | 2.83E-05 | ARHGAP6  |
| ENSG00000128641 | 1.227 | 4.53E-08 | MYO1B    |
| ENSG00000116977 | 1.227 | 5.29E-09 | LGALS8   |
| ENSG00000072422 | 1.231 | 6.87E-04 | RHOBTB1  |
| ENSG00000151320 | 1.242 | 4.59E-04 | AKAP6    |
| ENSG00000197757 | 1.243 | 4.59E-04 | HOXC6    |
| ENSG00000187098 | 1.247 | 9.09E-04 | MITF     |



|                 |       |          |             |
|-----------------|-------|----------|-------------|
| ENSG00000213578 | 1.247 | 5.56E-05 | CPLX3       |
| ENSG00000108309 | 1.248 | 1.82E-04 | RUNDC3A     |
| ENSG00000102575 | 1.248 | 6.42E-03 | ACP5        |
| ENSG00000235846 | 1.253 | 1.11E-05 | NA          |
| ENSG00000224189 | 1.256 | 9.47E-04 | HAGLR       |
| ENSG00000177990 | 1.257 | 7.09E-08 | DPY19L2     |
| ENSG00000108947 | 1.257 | 7.14E-05 | EFNB3       |
| ENSG00000212648 | 1.258 | 7.68E-03 | NA          |
| ENSG00000215559 | 1.258 | 4.35E-03 | ANKRD20A11P |
| ENSG00000131951 | 1.259 | 1.41E-03 | LRRC9       |
| ENSG00000109814 | 1.259 | 4.77E-09 | UGDH        |
| ENSG00000082556 | 1.262 | 8.68E-06 | OPRK1       |
| ENSG00000200394 | 1.262 | 3.67E-04 | SNORA38B    |
| ENSG00000023445 | 1.262 | 2.79E-04 | BIRC3       |
| ENSG00000206942 | 1.272 | 2.08E-06 | NA          |
| ENSG00000229078 | 1.273 | 3.41E-03 | NA          |
| ENSG00000152377 | 1.275 | 1.56E-08 | SPOCK1      |
| ENSG00000164983 | 1.278 | 9.12E-08 | TMEM65      |
| ENSG00000198478 | 1.280 | 3.83E-05 | SH3BGRL2    |
| ENSG00000080854 | 1.282 | 1.24E-07 | IGSF9B      |
| ENSG00000181652 | 1.284 | 1.65E-03 | ATG9B       |
| ENSG00000233756 | 1.286 | 3.63E-05 | DSCAM-IT1   |
| ENSG00000137571 | 1.288 | 3.30E-06 | SLCO5A1     |
| ENSG00000185303 | 1.290 | 3.47E-05 | SFTPA2      |
| ENSG00000175879 | 1.291 | 3.69E-03 | HOXD8       |
| ENSG00000132821 | 1.291 | 5.76E-05 | VSTM2L      |
| ENSG00000157423 | 1.293 | 4.71E-04 | HYDIN       |
| ENSG00000028839 | 1.295 | 3.07E-05 | TBPL1       |
| ENSG00000230862 | 1.297 | 3.41E-05 | NA          |
| ENSG00000231997 | 1.298 | 3.83E-04 | NA          |
| ENSG00000197442 | 1.300 | 8.54E-07 | MAP3K5      |
| ENSG00000165246 | 1.300 | 6.27E-04 | NLGN4Y      |
| ENSG00000023171 | 1.300 | 2.46E-03 | GRAMD1B     |
| ENSG00000196553 | 1.302 | 5.11E-03 | LINC00238   |
| ENSG00000182366 | 1.303 | 2.61E-03 | FAM87A      |
| ENSG00000179915 | 1.303 | 1.11E-06 | NRXN1       |
| ENSG00000204174 | 1.304 | 2.58E-03 | NPY4R       |
| ENSG00000166681 | 1.305 | 1.95E-05 | BEX3        |
| ENSG00000235945 | 1.307 | 2.13E-03 | NA          |

|                 |       |          |            |
|-----------------|-------|----------|------------|
| ENSG00000106070 | 1.312 | 4.45E-07 | GRB10      |
| ENSG00000104312 | 1.319 | 1.07E-05 | RIPK2      |
| ENSG00000072042 | 1.319 | 2.83E-07 | RDH11      |
| ENSG00000212283 | 1.320 | 3.93E-04 | SNORD89    |
| ENSG00000185338 | 1.322 | 8.78E-03 | SOCS1      |
| ENSG00000198133 | 1.325 | 3.84E-03 | TMEM229B   |
| ENSG00000205804 | 1.326 | 7.65E-04 | NA         |
| ENSG00000138769 | 1.328 | 1.16E-03 | CDKL2      |
| ENSG00000103316 | 1.337 | 1.77E-04 | CRYM       |
| ENSG00000165084 | 1.338 | 2.71E-06 | C8orf34    |
| ENSG00000154277 | 1.346 | 1.44E-03 | UCHL1      |
| ENSG00000012504 | 1.348 | 1.57E-03 | NR1H4      |
| ENSG00000180113 | 1.352 | 5.45E-06 | TDRD6      |
| ENSG00000218328 | 1.352 | 1.31E-03 | NA         |
| ENSG00000120324 | 1.354 | 6.61E-06 | PCDHB10    |
| ENSG00000075391 | 1.355 | 1.02E-04 | RASAL2     |
| ENSG00000230778 | 1.356 | 1.37E-03 | ANKRD63    |
| ENSG00000185112 | 1.368 | 4.12E-08 | FAM43A     |
| ENSG00000108176 | 1.370 | 8.18E-04 | DNAJC12    |
| ENSG00000207487 | 1.372 | 1.02E-03 | NA         |
| ENSG00000137393 | 1.375 | 1.22E-04 | RNF144B    |
| ENSG00000230810 | 1.376 | 3.83E-03 | NA         |
| ENSG00000013293 | 1.378 | 1.01E-03 | SLC7A14    |
| ENSG00000237858 | 1.380 | 5.22E-03 | NA         |
| ENSG00000235217 | 1.384 | 6.96E-03 | TSPY26P    |
| ENSG00000213579 | 1.388 | 3.59E-04 | NA         |
| ENSG00000222332 | 1.388 | 3.97E-03 | NA         |
| ENSG00000106829 | 1.390 | 1.42E-03 | TLE4       |
| ENSG00000233363 | 1.392 | 7.72E-04 | NA         |
| ENSG00000214689 | 1.393 | 5.49E-03 | NA         |
| ENSG00000131771 | 1.394 | 2.39E-03 | PPP1R1B    |
| ENSG00000187193 | 1.395 | 1.57E-04 | MT1X       |
| ENSG00000171488 | 1.397 | 9.46E-03 | LRRC8C     |
| ENSG00000112796 | 1.397 | 1.62E-05 | ENPP5      |
| ENSG00000145920 | 1.401 | 4.06E-06 | CPLX2      |
| ENSG00000113212 | 1.402 | 3.85E-04 | PCDHB7     |
| ENSG00000227646 | 1.408 | 5.14E-04 | STEAP2-AS1 |
| ENSG00000223477 | 1.409 | 2.14E-04 | NA         |
| ENSG00000234855 | 1.411 | 6.77E-03 | SLIT1-AS1  |

|                 |       |          |            |
|-----------------|-------|----------|------------|
| ENSG00000146233 | 1.416 | 2.97E-03 | CYP39A1    |
| ENSG00000167588 | 1.417 | 4.42E-03 | GPD1       |
| ENSG00000171680 | 1.417 | 9.86E-04 | PLEKHG5    |
| ENSG00000060656 | 1.420 | 5.89E-05 | PTPRU      |
| ENSG00000200182 | 1.423 | 8.31E-06 | NA         |
| ENSG00000143079 | 1.424 | 2.65E-09 | CTTNBP2NL  |
| ENSG00000207405 | 1.430 | 1.30E-06 | SNORA64    |
| ENSG00000134780 | 1.440 | 3.04E-04 | DAGLA      |
| ENSG00000137968 | 1.443 | 1.66E-08 | SLC44A5    |
| ENSG00000205822 | 1.445 | 2.13E-03 | NA         |
| ENSG00000224493 | 1.449 | 2.69E-05 | NA         |
| ENSG00000186063 | 1.456 | 8.03E-05 | AIDA       |
| ENSG00000104967 | 1.457 | 5.91E-03 | NOVA2      |
| ENSG00000101144 | 1.460 | 7.43E-07 | BMP7       |
| ENSG00000198353 | 1.460 | 4.21E-03 | HOXC4      |
| ENSG00000232833 | 1.462 | 8.22E-03 | NA         |
| ENSG00000219159 | 1.466 | 2.62E-05 | NA         |
| ENSG00000233930 | 1.480 | 8.34E-03 | KRTAP5-AS1 |
| ENSG00000225813 | 1.487 | 1.99E-03 | NA         |
| ENSG00000090402 | 1.487 | 1.72E-06 | SI         |
| ENSG00000236622 | 1.489 | 6.04E-04 | NA         |
| ENSG00000090339 | 1.493 | 3.69E-03 | ICAM1      |
| ENSG00000142515 | 1.497 | 1.40E-06 | KLK3       |
| ENSG00000131831 | 1.501 | 9.04E-06 | RAI2       |
| ENSG00000178222 | 1.502 | 7.20E-03 | RNF212     |
| ENSG00000128652 | 1.503 | 3.45E-03 | HOXD3      |
| ENSG00000113389 | 1.505 | 3.66E-04 | NPR3       |
| ENSG00000128536 | 1.509 | 5.76E-06 | CDHR3      |
| ENSG00000146411 | 1.511 | 1.14E-05 | SLC2A12    |
| ENSG00000196227 | 1.515 | 6.43E-08 | FAM217B    |
| ENSG00000158560 | 1.519 | 1.40E-03 | DYNC1I1    |
| ENSG00000041982 | 1.521 | 1.31E-03 | TNC        |
| ENSG00000175899 | 1.526 | 5.50E-03 | A2M        |
| ENSG00000048052 | 1.526 | 1.88E-03 | HDAC9      |
| ENSG00000143502 | 1.531 | 1.10E-06 | SUSD4      |
| ENSG00000145349 | 1.533 | 9.15E-08 | CAMK2D     |
| ENSG00000150510 | 1.541 | 8.10E-05 | FAM124A    |
| ENSG00000235978 | 1.543 | 1.04E-03 | NA         |
| ENSG00000077585 | 1.544 | 1.80E-06 | GPR137B    |

|                 |       |          |          |
|-----------------|-------|----------|----------|
| ENSG00000135916 | 1.545 | 1.38E-05 | ITM2C    |
| ENSG00000069188 | 1.547 | 6.55E-04 | SDK2     |
| ENSG00000216306 | 1.547 | 4.28E-06 | KRT19P2  |
| ENSG00000186481 | 1.549 | 2.64E-06 | NA       |
| ENSG00000165030 | 1.550 | 7.00E-07 | NFIL3    |
| ENSG00000151491 | 1.553 | 9.73E-05 | EPS8     |
| ENSG00000148468 | 1.554 | 2.96E-07 | FAM171A1 |
| ENSG00000104154 | 1.555 | 9.71E-07 | SLC30A4  |
| ENSG00000157214 | 1.560 | 4.08E-08 | STEAP2   |
| ENSG00000080493 | 1.570 | 2.51E-03 | SLC4A4   |
| ENSG00000110318 | 1.576 | 3.07E-05 | CEP126   |
| ENSG00000101210 | 1.576 | 2.29E-07 | EEF1A2   |
| ENSG00000185002 | 1.578 | 3.30E-06 | RFX6     |
| ENSG00000180914 | 1.578 | 2.85E-04 | OXTR     |
| ENSG00000163083 | 1.579 | 7.73E-06 | INHBB    |
| ENSG00000104722 | 1.582 | 7.14E-05 | NEFM     |
| ENSG00000185950 | 1.583 | 1.12E-07 | IRS2     |
| ENSG00000196557 | 1.585 | 1.40E-07 | CACNA1H  |
| ENSG00000185176 | 1.587 | 5.50E-04 | AQP12B   |
| ENSG00000010438 | 1.587 | 2.46E-03 | PRSS3    |
| ENSG00000075223 | 1.589 | 4.29E-05 | SEMA3C   |
| ENSG00000239039 | 1.592 | 3.66E-03 | SNORD13  |
| ENSG00000099250 | 1.593 | 1.05E-09 | NRP1     |
| ENSG00000157654 | 1.603 | 6.42E-08 | PALM2    |
| ENSG00000121743 | 1.604 | 7.34E-03 | GJA3     |
| ENSG00000131016 | 1.607 | 9.41E-08 | AKAP12   |
| ENSG00000054690 | 1.614 | 3.35E-08 | PLEKHH1  |
| ENSG00000237969 | 1.615 | 4.06E-04 | NA       |
| ENSG00000117525 | 1.618 | 4.65E-05 | F3       |
| ENSG00000070886 | 1.620 | 1.84E-05 | EPHA8    |
| ENSG00000162437 | 1.620 | 7.01E-06 | RAVER2   |
| ENSG00000127863 | 1.636 | 6.25E-03 | TNFRSF19 |
| ENSG00000182389 | 1.642 | 9.49E-03 | CACNB4   |
| ENSG00000189058 | 1.644 | 1.84E-08 | APOD     |
| ENSG00000129654 | 1.646 | 6.31E-05 | FOXJ1    |
| ENSG00000090971 | 1.653 | 1.51E-05 | NAT14    |
| ENSG00000177459 | 1.656 | 8.22E-04 | ERICH5   |
| ENSG00000165985 | 1.656 | 6.96E-03 | C1QL3    |
| ENSG00000137878 | 1.662 | 1.83E-08 | GCOM1    |

|                 |       |          |           |
|-----------------|-------|----------|-----------|
| ENSG00000172789 | 1.665 | 9.33E-05 | HOXC5     |
| ENSG00000067113 | 1.670 | 1.80E-06 | PLPP1     |
| ENSG00000081181 | 1.671 | 1.02E-07 | ARG2      |
| ENSG00000165186 | 1.673 | 2.64E-03 | PTCHD1    |
| ENSG00000187391 | 1.677 | 1.10E-07 | MAGI2     |
| ENSG00000101493 | 1.679 | 1.07E-05 | ZNF516    |
| ENSG00000167992 | 1.681 | 1.44E-03 | VWCE      |
| ENSG00000237410 | 1.689 | 9.90E-03 | NA        |
| ENSG00000183798 | 1.691 | 2.35E-05 | EMILIN3   |
| ENSG00000145439 | 1.691 | 7.46E-09 | CBR4      |
| ENSG00000230022 | 1.697 | 4.48E-03 | NA        |
| ENSG00000101096 | 1.702 | 1.27E-04 | NFATC2    |
| ENSG00000159388 | 1.703 | 1.70E-08 | BTG2      |
| ENSG00000128482 | 1.710 | 5.03E-03 | RNF112    |
| ENSG00000229904 | 1.712 | 4.04E-08 | NA        |
| ENSG00000223882 | 1.714 | 5.19E-03 | ABCC5-AS1 |
| ENSG00000106714 | 1.714 | 8.89E-04 | CNTNAP3   |
| ENSG00000105792 | 1.717 | 2.82E-06 | CFAP69    |
| ENSG00000237159 | 1.720 | 4.00E-03 | NA        |
| ENSG00000140479 | 1.722 | 1.22E-06 | PCSK6     |
| ENSG00000231006 | 1.728 | 2.59E-04 | NA        |
| ENSG00000196353 | 1.729 | 4.96E-08 | CPNE4     |
| ENSG00000184185 | 1.732 | 3.62E-06 | KCNJ12    |
| ENSG00000091844 | 1.734 | 6.99E-05 | RGS17     |
| ENSG00000171587 | 1.742 | 7.29E-09 | DSCAM     |
| ENSG00000169435 | 1.742 | 1.69E-04 | RASSF6    |
| ENSG00000125266 | 1.743 | 6.21E-06 | EFNB2     |
| ENSG00000146070 | 1.746 | 3.17E-07 | PLA2G7    |
| ENSG00000152766 | 1.755 | 2.12E-03 | ANKRD22   |
| ENSG00000170365 | 1.763 | 5.03E-04 | SMAD1     |
| ENSG00000143479 | 1.766 | 1.08E-03 | DYRK3     |
| ENSG00000132872 | 1.766 | 3.10E-07 | SYT4      |
| ENSG00000147889 | 1.770 | 4.25E-03 | CDKN2A    |
| ENSG00000100604 | 1.773 | 4.07E-08 | CHGA      |
| ENSG00000101871 | 1.780 | 1.88E-08 | MID1      |
| ENSG00000163686 | 1.781 | 2.92E-03 | ABHD6     |
| ENSG00000214575 | 1.782 | 8.51E-04 | CPEB1     |
| ENSG00000169604 | 1.783 | 2.80E-10 | ANTXR1    |
| ENSG00000145687 | 1.784 | 1.60E-03 | SSBP2     |

|                 |       |          |           |
|-----------------|-------|----------|-----------|
| ENSG00000196368 | 1.787 | 1.56E-03 | NUDT11    |
| ENSG00000186197 | 1.793 | 2.34E-04 | EDARADD   |
| ENSG00000130962 | 1.795 | 5.15E-03 | PRRG1     |
| ENSG00000162545 | 1.800 | 2.14E-07 | CAMK2N1   |
| ENSG00000107719 | 1.805 | 1.63E-03 | PALD1     |
| ENSG00000001561 | 1.811 | 8.10E-06 | ENPP4     |
| ENSG00000081138 | 1.814 | 1.07E-06 | CDH7      |
| ENSG00000100422 | 1.814 | 2.34E-04 | CERK      |
| ENSG00000153234 | 1.819 | 4.65E-03 | NR4A2     |
| ENSG00000152154 | 1.820 | 6.35E-04 | TMEM178A  |
| ENSG00000227770 | 1.823 | 2.22E-03 | NA        |
| ENSG00000109794 | 1.825 | 5.53E-07 | FAM149A   |
| ENSG00000166840 | 1.837 | 2.57E-05 | GLYATL1   |
| ENSG00000164749 | 1.840 | 1.59E-04 | HNF4G     |
| ENSG00000234593 | 1.849 | 6.17E-04 | NA        |
| ENSG00000151458 | 1.852 | 1.77E-09 | ANKRD50   |
| ENSG00000139910 | 1.854 | 2.04E-03 | NOVA1     |
| ENSG00000113763 | 1.862 | 8.32E-07 | UNC5A     |
| ENSG00000231439 | 1.879 | 3.20E-03 | WASIR2    |
| ENSG00000053108 | 1.882 | 9.52E-05 | FSTL4     |
| ENSG00000107104 | 1.899 | 1.52E-07 | KANK1     |
| ENSG00000153012 | 1.903 | 1.63E-03 | LGI2      |
| ENSG00000141540 | 1.907 | 1.11E-05 | TTYH2     |
| ENSG00000157150 | 1.910 | 4.50E-03 | TIMP4     |
| ENSG00000180881 | 1.910 | 1.14E-03 | CAPS2     |
| ENSG00000122756 | 1.911 | 1.61E-04 | CNTFR     |
| ENSG00000104725 | 1.920 | 3.17E-07 | NA        |
| ENSG00000003436 | 1.920 | 1.06E-04 | TFPI      |
| ENSG00000137843 | 1.926 | 1.73E-05 | PAK6      |
| ENSG00000173334 | 1.929 | 5.82E-12 | TRIB1     |
| ENSG00000072858 | 1.932 | 4.18E-03 | SIDT1     |
| ENSG00000185015 | 1.950 | 1.78E-04 | CA13      |
| ENSG00000229891 | 1.955 | 6.46E-03 | LINC01315 |
| ENSG00000168229 | 1.956 | 9.92E-03 | PTGDR     |
| ENSG00000104833 | 1.971 | 3.19E-04 | TUBB4A    |
| ENSG00000137501 | 1.972 | 6.44E-06 | SYTL2     |
| ENSG00000163449 | 1.974 | 1.76E-03 | TMEM169   |
| ENSG00000106686 | 1.980 | 2.84E-06 | SPATA6L   |
| ENSG00000184588 | 1.984 | 1.59E-03 | PDE4B     |

|                 |       |          |           |
|-----------------|-------|----------|-----------|
| ENSG00000221396 | 1.986 | 1.84E-03 | NA        |
| ENSG00000235229 | 1.989 | 7.03E-03 | NA        |
| ENSG00000116176 | 1.993 | 3.49E-03 | TPSG1     |
| ENSG00000186310 | 1.996 | 4.23E-03 | NAP1L3    |
| ENSG00000186462 | 1.998 | 9.68E-05 | NAP1L2    |
| ENSG00000172817 | 2.000 | 4.24E-06 | CYP7B1    |
| ENSG00000125813 | 2.003 | 6.97E-04 | PAX1      |
| ENSG00000170153 | 2.007 | 2.71E-04 | RNF150    |
| ENSG00000064655 | 2.009 | 1.47E-03 | EYA2      |
| ENSG00000074211 | 2.014 | 1.75E-06 | PPP2R2C   |
| ENSG00000234341 | 2.015 | 3.16E-03 | NA        |
| ENSG00000136167 | 2.016 | 4.09E-11 | LCP1      |
| ENSG00000123094 | 2.017 | 4.26E-08 | RASSF8    |
| ENSG00000173320 | 2.017 | 9.12E-03 | STOX2     |
| ENSG00000165990 | 2.026 | 6.30E-03 | NA        |
| ENSG00000112149 | 2.031 | 1.33E-03 | CD83      |
| ENSG00000116741 | 2.032 | 3.09E-03 | RGS2      |
| ENSG00000171282 | 2.034 | 3.81E-04 | NA        |
| ENSG00000137727 | 2.038 | 5.66E-08 | ARHGAP20  |
| ENSG00000232588 | 2.040 | 4.41E-03 | NA        |
| ENSG00000233154 | 2.051 | 7.76E-03 | LINC01762 |
| ENSG00000162144 | 2.053 | 2.91E-09 | CYB561A3  |
| ENSG00000173947 | 2.057 | 3.61E-03 | PIFO      |
| ENSG00000150625 | 2.058 | 4.75E-03 | GPM6A     |
| ENSG00000197410 | 2.060 | 5.95E-04 | DCHS2     |
| ENSG00000207147 | 2.062 | 1.55E-03 | NA        |
| ENSG00000214290 | 2.064 | 4.00E-09 | COLCA2    |
| ENSG00000137198 | 2.068 | 3.42E-08 | GMPR      |
| ENSG00000107954 | 2.069 | 4.40E-07 | NEURL1    |
| ENSG00000105889 | 2.069 | 1.35E-04 | STEAP1B   |
| ENSG00000206503 | 2.072 | 3.11E-04 | HLA-A     |
| ENSG00000112320 | 2.077 | 2.18E-06 | SOBP      |
| ENSG00000219016 | 2.078 | 1.29E-05 | NA        |
| ENSG00000135374 | 2.079 | 9.21E-03 | ELF5      |
| ENSG00000168952 | 2.088 | 6.86E-06 | STXBP6    |
| ENSG00000164647 | 2.091 | 2.01E-10 | STEAP1    |
| ENSG00000135905 | 2.093 | 4.84E-08 | DOCK10    |
| ENSG00000005108 | 2.100 | 9.43E-07 | THSD7A    |
| ENSG00000128268 | 2.103 | 1.05E-07 | MGAT3     |

|                 |       |          |           |
|-----------------|-------|----------|-----------|
| ENSG00000131044 | 2.103 | 3.29E-03 | TTL9      |
| ENSG00000113742 | 2.105 | 2.64E-08 | CPEB4     |
| ENSG00000204589 | 2.107 | 8.52E-05 | NA        |
| ENSG00000162407 | 2.113 | 1.76E-06 | PLPP3     |
| ENSG00000234459 | 2.124 | 3.05E-04 | NA        |
| ENSG00000182013 | 2.139 | 8.59E-06 | PNMAL1    |
| ENSG00000181495 | 2.152 | 8.58E-06 | NA        |
| ENSG00000224457 | 2.167 | 2.67E-04 | NA        |
| ENSG00000145536 | 2.174 | 4.38E-03 | ADAMTS16  |
| ENSG00000171451 | 2.192 | 1.29E-10 | DSEL      |
| ENSG00000107518 | 2.196 | 1.64E-05 | ATRNL1    |
| ENSG00000103742 | 2.197 | 6.98E-03 | IGDCC4    |
| ENSG00000140968 | 2.199 | 5.50E-06 | IRF8      |
| ENSG00000131711 | 2.200 | 4.52E-09 | MAP1B     |
| ENSG00000115884 | 2.202 | 2.76E-11 | SDC1      |
| ENSG00000238597 | 2.203 | 2.10E-03 | SNORD4B   |
| ENSG00000153292 | 2.204 | 3.35E-05 | ADGRF1    |
| ENSG00000196167 | 2.204 | 9.59E-13 | NA        |
| ENSG00000219438 | 2.209 | 3.21E-06 | FAM19A5   |
| ENSG00000165443 | 2.210 | 1.28E-06 | PHYHIPL   |
| ENSG00000186710 | 2.212 | 9.50E-03 | CFAP73    |
| ENSG00000233215 | 2.213 | 2.73E-09 | LINC01687 |
| ENSG00000166897 | 2.225 | 1.05E-04 | ELFN2     |
| ENSG00000198780 | 2.235 | 5.81E-07 | FAM169A   |
| ENSG00000233581 | 2.243 | 7.81E-03 | NA        |
| ENSG00000110436 | 2.244 | 2.78E-08 | SLC1A2    |
| ENSG00000154330 | 2.256 | 9.44E-03 | PGM5      |
| ENSG00000026508 | 2.260 | 2.24E-05 | CD44      |
| ENSG00000166923 | 2.267 | 8.91E-06 | GREM1     |
| ENSG00000162981 | 2.275 | 6.25E-07 | FAM84A    |
| ENSG00000103310 | 2.276 | 5.78E-03 | ZP2       |
| ENSG00000160188 | 2.277 | 3.11E-04 | RSPH1     |
| ENSG00000226230 | 2.278 | 4.22E-04 | NA        |
| ENSG00000112182 | 2.279 | 2.73E-05 | BACH2     |
| ENSG00000067798 | 2.281 | 1.58E-04 | NAV3      |
| ENSG00000144476 | 2.282 | 9.44E-04 | ACKR3     |
| ENSG00000092969 | 2.288 | 7.66E-04 | TGFB2     |
| ENSG00000166432 | 2.290 | 6.72E-06 | ZMAT1     |
| ENSG00000082497 | 2.295 | 1.22E-04 | SERTAD4   |



|                 |       |          |           |
|-----------------|-------|----------|-----------|
| ENSG00000064652 | 2.301 | 2.44E-03 | SNX24     |
| ENSG00000234206 | 2.308 | 4.32E-04 | NA        |
| ENSG00000169252 | 2.315 | 1.09E-04 | ADRB2     |
| ENSG00000227914 | 2.315 | 4.67E-03 | NA        |
| ENSG00000235920 | 2.318 | 1.75E-03 | NA        |
| ENSG00000182985 | 2.320 | 1.08E-11 | CADM1     |
| ENSG00000236609 | 2.322 | 3.51E-04 | ZNF853    |
| ENSG00000132329 | 2.327 | 3.11E-05 | RAMP1     |
| ENSG00000139173 | 2.339 | 3.12E-04 | TMEM117   |
| ENSG00000133639 | 2.366 | 2.82E-10 | BTG1      |
| ENSG00000169418 | 2.366 | 3.04E-06 | NPR1      |
| ENSG00000226403 | 2.380 | 8.68E-04 | NA        |
| ENSG00000114200 | 2.387 | 2.28E-03 | BCHE      |
| ENSG00000200879 | 2.395 | 4.31E-04 | SNORD14E  |
| ENSG00000213626 | 2.413 | 6.81E-05 | LBH       |
| ENSG00000184856 | 2.422 | 2.38E-06 | LINC00308 |
| ENSG00000112773 | 2.423 | 9.96E-04 | FAM46A    |
| ENSG00000166974 | 2.425 | 1.64E-06 | MAPRE2    |
| ENSG00000142512 | 2.449 | 6.28E-06 | SIGLEC10  |
| ENSG00000122585 | 2.454 | 2.53E-06 | NPY       |
| ENSG00000238016 | 2.457 | 8.98E-03 | NA        |
| ENSG00000197872 | 2.460 | 4.61E-08 | FAM49A    |
| ENSG00000181467 | 2.462 | 9.84E-09 | RAP2B     |
| ENSG00000106123 | 2.462 | 1.05E-09 | EPHB6     |
| ENSG00000158258 | 2.465 | 4.22E-08 | CLSTN2    |
| ENSG00000058335 | 2.490 | 7.41E-03 | RASGRF1   |
| ENSG00000116729 | 2.492 | 2.45E-06 | WLS       |
| ENSG00000165272 | 2.496 | 4.68E-08 | AQP3      |
| ENSG00000182836 | 2.502 | 8.45E-03 | PLCXD3    |
| ENSG00000222889 | 2.505 | 6.24E-04 | NA        |
| ENSG00000232739 | 2.505 | 8.30E-03 | NA        |
| ENSG00000165895 | 2.510 | 9.90E-03 | ARHGAP42  |
| ENSG00000235123 | 2.519 | 5.19E-04 | DSCAM-AS1 |
| ENSG00000179362 | 2.527 | 4.10E-03 | NA        |
| ENSG00000113302 | 2.550 | 5.00E-03 | IL12B     |
| ENSG00000115963 | 2.559 | 3.69E-03 | RND3      |
| ENSG00000169760 | 2.576 | 1.76E-03 | NLGN1     |
| ENSG00000176895 | 2.600 | 2.00E-03 | OR51A7    |
| ENSG00000106236 | 2.604 | 2.03E-05 | NPTX2     |

|                 |       |          |           |
|-----------------|-------|----------|-----------|
| ENSG00000112139 | 2.604 | 5.37E-04 | MDGA1     |
| ENSG00000117154 | 2.605 | 2.60E-05 | IGSF21    |
| ENSG00000184564 | 2.610 | 2.55E-03 | SLITRK6   |
| ENSG00000182568 | 2.614 | 1.37E-08 | SATB1     |
| ENSG00000146373 | 2.619 | 8.53E-03 | RNF217    |
| ENSG00000151883 | 2.620 | 1.34E-05 | PARP8     |
| ENSG00000151067 | 2.632 | 2.54E-10 | CACNA1C   |
| ENSG00000087250 | 2.642 | 1.23E-03 | MT3       |
| ENSG00000215386 | 2.654 | 2.50E-08 | NA        |
| ENSG00000117600 | 2.656 | 1.32E-03 | PLPPR4    |
| ENSG00000125384 | 2.666 | 4.50E-08 | PTGER2    |
| ENSG00000187634 | 2.680 | 8.62E-07 | SAMD11    |
| ENSG00000175267 | 2.688 | 2.19E-03 | VWA3A     |
| ENSG00000110076 | 2.692 | 1.51E-10 | NRXN2     |
| ENSG00000144583 | 2.706 | 1.31E-05 | MARC4     |
| ENSG00000226454 | 2.713 | 1.81E-03 | NA        |
| ENSG00000228732 | 2.715 | 3.96E-04 | NA        |
| ENSG00000223411 | 2.724 | 9.92E-03 | NA        |
| ENSG00000119138 | 2.726 | 2.75E-09 | KLF9      |
| ENSG00000128714 | 2.728 | 1.11E-03 | HOXD13    |
| ENSG00000166780 | 2.737 | 1.14E-04 | C16orf45  |
| ENSG00000137699 | 2.748 | 1.58E-03 | TRIM29    |
| ENSG00000226664 | 2.764 | 9.93E-04 | NA        |
| ENSG00000215322 | 2.768 | 1.05E-03 | NA        |
| ENSG00000144290 | 2.769 | 3.43E-04 | SLC4A10   |
| ENSG00000196358 | 2.770 | 2.45E-03 | NTNG2     |
| ENSG00000158816 | 2.776 | 2.97E-09 | VWA5B1    |
| ENSG00000239133 | 2.798 | 6.82E-03 | NA        |
| ENSG00000234884 | 2.803 | 7.34E-03 | NA        |
| ENSG00000040731 | 2.806 | 7.11E-04 | CDH10     |
| ENSG00000223561 | 2.827 | 8.56E-05 | LOC646588 |
| ENSG00000183833 | 2.843 | 9.34E-03 | MAATS1    |
| ENSG00000149212 | 2.845 | 5.43E-09 | SESN3     |
| ENSG00000167680 | 2.850 | 3.40E-03 | SEMA6B    |
| ENSG00000157087 | 2.860 | 3.16E-04 | ATP2B2    |
| ENSG00000069206 | 2.876 | 2.08E-07 | ADAM7     |
| ENSG00000171016 | 2.891 | 3.67E-03 | PYGO1     |
| ENSG00000171724 | 2.892 | 8.28E-03 | VAT1L     |
| ENSG00000188643 | 2.913 | 3.72E-05 | S100A16   |

|                 |       |          |           |
|-----------------|-------|----------|-----------|
| ENSG00000136960 | 2.914 | 4.85E-03 | ENPP2     |
| ENSG00000178199 | 2.932 | 4.01E-03 | ZC3H12D   |
| ENSG00000036565 | 2.944 | 6.10E-04 | SLC18A1   |
| ENSG00000158270 | 2.971 | 2.17E-09 | COLEC12   |
| ENSG00000105609 | 2.971 | 7.17E-03 | LILRB5    |
| ENSG00000232293 | 2.976 | 4.91E-03 | NA        |
| ENSG00000184735 | 2.980 | 5.27E-03 | DDX53     |
| ENSG00000164746 | 2.980 | 6.66E-03 | C7orf57   |
| ENSG00000182870 | 2.996 | 8.29E-05 | GALNT9    |
| ENSG00000234263 | 2.998 | 3.31E-03 | NA        |
| ENSG00000198739 | 2.999 | 4.51E-03 | LRRTM3    |
| ENSG00000102010 | 3.024 | 5.70E-05 | BMX       |
| ENSG00000109846 | 3.044 | 2.69E-03 | CRYAB     |
| ENSG00000214039 | 3.055 | 3.12E-06 | LINC02418 |
| ENSG00000222068 | 3.060 | 4.02E-03 | NA        |
| ENSG00000165495 | 3.082 | 4.65E-03 | PKNOX2    |
| ENSG00000176893 | 3.091 | 2.19E-03 | OR51G2    |
| ENSG00000131196 | 3.094 | 5.21E-04 | NFATC1    |
| ENSG00000139970 | 3.101 | 9.74E-07 | RTN1      |
| ENSG00000235784 | 3.106 | 3.11E-03 | NA        |
| ENSG00000058866 | 3.107 | 6.21E-04 | DGKG      |
| ENSG00000176904 | 3.111 | 1.97E-03 | OR51H1    |
| ENSG00000198217 | 3.130 | 2.91E-04 | NA        |
| ENSG00000169064 | 3.149 | 3.30E-03 | ZBBX      |
| ENSG00000121297 | 3.149 | 3.83E-03 | TSHZ3     |
| ENSG00000234253 | 3.150 | 4.22E-03 | NA        |
| ENSG00000121005 | 3.152 | 3.12E-03 | CRISPLD1  |
| ENSG00000227128 | 3.184 | 8.15E-03 | NA        |
| ENSG00000137801 | 3.196 | 4.41E-10 | THBS1     |
| ENSG00000217455 | 3.214 | 2.91E-03 | NA        |
| ENSG00000110693 | 3.220 | 5.89E-03 | SOX6      |
| ENSG00000207319 | 3.239 | 4.84E-03 | NA        |
| ENSG00000233516 | 3.248 | 4.94E-03 | NA        |
| ENSG00000177098 | 3.252 | 7.56E-04 | SCN4B     |
| ENSG00000145362 | 3.268 | 1.35E-06 | ANK2      |
| ENSG00000118997 | 3.279 | 5.44E-07 | DNAH7     |
| ENSG00000227352 | 3.283 | 7.17E-03 | NA        |
| ENSG00000231001 | 3.288 | 2.04E-03 | NA        |
| ENSG00000145309 | 3.288 | 6.06E-03 | CABS1     |

|                 |       |          |              |
|-----------------|-------|----------|--------------|
| ENSG00000197426 | 3.292 | 3.47E-03 | NA           |
| ENSG00000148600 | 3.313 | 3.13E-03 | CDHR1        |
| ENSG00000157399 | 3.314 | 1.02E-03 | ARSE         |
| ENSG00000163735 | 3.316 | 2.56E-03 | CXCL5        |
| ENSG00000205763 | 3.327 | 3.61E-03 | RP9P         |
| ENSG00000230699 | 3.345 | 1.46E-08 | NA           |
| ENSG00000115604 | 3.361 | 2.92E-04 | IL18R1       |
| ENSG00000176937 | 3.401 | 1.13E-04 | NA           |
| ENSG00000162373 | 3.403 | 7.14E-04 | BEND5        |
| ENSG00000156564 | 3.440 | 6.18E-06 | LRFN2        |
| ENSG00000235949 | 3.471 | 6.39E-03 | NA           |
| ENSG00000155886 | 3.486 | 7.55E-04 | SLC24A2      |
| ENSG00000233705 | 3.487 | 1.81E-03 | SLC26A4-AS1  |
| ENSG00000232452 | 3.496 | 8.94E-04 | NA           |
| ENSG00000130600 | 3.510 | 8.91E-03 | H19          |
| ENSG00000116106 | 3.526 | 5.79E-08 | EPHA4        |
| ENSG00000231070 | 3.526 | 9.15E-04 | NA           |
| ENSG00000172348 | 3.535 | 1.74E-05 | RCAN2        |
| ENSG00000145242 | 3.557 | 2.79E-04 | EPHA5        |
| ENSG00000223928 | 3.589 | 2.28E-03 | NA           |
| ENSG00000233644 | 3.607 | 3.20E-04 | NA           |
| ENSG00000228314 | 3.635 | 6.76E-04 | CYP4F29P     |
| ENSG00000164484 | 3.645 | 3.27E-03 | TMEM200A     |
| ENSG00000213083 | 3.668 | 4.57E-03 | NA           |
| ENSG00000198889 | 3.676 | 1.74E-03 | DCAF12L1     |
| ENSG00000154127 | 3.715 | 1.27E-05 | UBASH3B      |
| ENSG00000151623 | 3.728 | 7.08E-10 | NR3C2        |
| ENSG00000197428 | 3.733 | 2.33E-05 | OR51D1       |
| ENSG00000134198 | 3.736 | 9.37E-04 | TSPAN2       |
| ENSG00000176900 | 3.749 | 3.13E-04 | OR51T1       |
| ENSG00000198010 | 3.761 | 5.50E-04 | DLGAP2       |
| ENSG00000131477 | 3.767 | 3.86E-04 | RAMP2        |
| ENSG00000188257 | 3.780 | 1.01E-05 | PLA2G2A      |
| ENSG00000235875 | 3.802 | 2.10E-03 | ARHGEF7-AS2  |
| ENSG00000169439 | 3.804 | 1.29E-07 | SDC2         |
| ENSG00000231958 | 3.806 | 2.09E-04 | NA           |
| ENSG00000237949 | 3.823 | 9.68E-04 | NA           |
| ENSG00000223764 | 3.838 | 4.98E-06 | LOC100130417 |
| ENSG00000197984 | 3.838 | 1.28E-03 | NA           |

|                 |       |          |         |
|-----------------|-------|----------|---------|
| ENSG00000176922 | 3.840 | 1.38E-03 | OR51S1  |
| ENSG00000174948 | 3.853 | 4.68E-04 | GPR149  |
| ENSG00000111432 | 3.883 | 4.98E-04 | FZD10   |
| ENSG00000105696 | 3.964 | 4.34E-04 | TMEM59L |
| ENSG00000138759 | 3.981 | 3.30E-06 | FRAS1   |
| ENSG00000169248 | 3.983 | 4.52E-03 | CXCL11  |
| ENSG00000188069 | 4.026 | 2.51E-04 | NA      |
| ENSG00000086205 | 4.049 | 3.08E-06 | FOLH1   |
| ENSG00000225003 | 4.064 | 1.11E-03 | NA      |
| ENSG00000179813 | 4.071 | 7.35E-04 | FAM216B |
| ENSG00000198597 | 4.111 | 2.18E-03 | ZNF536  |
| ENSG00000227418 | 4.145 | 9.07E-04 | PCGEM1  |
| ENSG00000171951 | 4.160 | 1.62E-06 | SCG2    |
| ENSG00000166509 | 4.265 | 5.98E-03 | CLEC3A  |
| ENSG00000147724 | 4.319 | 1.57E-03 | FAM135B |
| ENSG00000196090 | 4.330 | 2.81E-04 | PTPRT   |
| ENSG00000231648 | 4.352 | 8.23E-05 | NA      |
| ENSG00000033122 | 4.356 | 4.42E-04 | LRRC7   |
| ENSG00000162989 | 4.357 | 8.02E-05 | KCNJ3   |
| ENSG00000237429 | 4.364 | 1.87E-04 | NA      |
| ENSG00000146674 | 4.394 | 6.11E-05 | IGFBP3  |
| ENSG00000156298 | 4.415 | 2.08E-04 | TSPAN7  |
| ENSG00000136999 | 4.423 | 1.74E-06 | NOV     |
| ENSG00000123095 | 4.462 | 1.99E-06 | BHLHE41 |
| ENSG00000078295 | 4.467 | 1.43E-05 | ADCY2   |
| ENSG00000169083 | 4.480 | 3.42E-15 | AR      |
| ENSG00000232125 | 4.505 | 1.16E-04 | DYTN    |
| ENSG00000168772 | 4.549 | 4.23E-05 | CXXC4   |
| ENSG00000183098 | 4.586 | 1.37E-04 | GPC6    |
| ENSG00000167332 | 4.604 | 7.82E-08 | OR51E2  |
| ENSG00000176879 | 4.617 | 4.02E-05 | NA      |
| ENSG00000089250 | 4.726 | 1.71E-03 | NOS1    |
| ENSG00000176951 | 4.787 | 2.64E-04 | NA      |
| ENSG00000176925 | 4.805 | 1.45E-03 | OR51F2  |
| ENSG00000170369 | 4.885 | 1.20E-03 | CST2    |
| ENSG00000184838 | 4.911 | 6.21E-05 | PRR16   |
| ENSG00000167434 | 5.032 | 3.29E-04 | CA4     |
| ENSG00000180785 | 5.387 | 1.39E-08 | OR51E1  |
| ENSG00000144339 | 5.441 | 9.94E-08 | TMEFF2  |

|                 |       |          |        |
|-----------------|-------|----------|--------|
| ENSG00000111319 | 5.668 | 3.06E-05 | SCNN1A |
| ENSG00000233766 | 5.697 | 1.55E-04 | NA     |
| ENSG00000135074 | 5.874 | 2.42E-04 | ADAM19 |
| ENSG00000197674 | 6.150 | 9.02E-04 | NA     |
| ENSG00000120251 | 7.558 | 3.27E-04 | GRIA2  |

**Supplementary Table S2: Differentially expressed genes in serial biopsies of VCaP xenografts, CRPC vs. Pre-Cx.** Expression data from RNA sequencing of serial biopsies of VCaP tumors prior to castration (Pre-Cx) and following development of castration resistant prostate cancer (CRPC). log2FC – log2 fold change.

| <b>Ensemble ID</b> | <b>log2FC</b> | <b>P Value</b> | <b>Symbol</b> |
|--------------------|---------------|----------------|---------------|
| ENSG00000170419    | -6.282        | 1.17E-07       | VSTM2A        |
| ENSG00000197635    | -5.775        | 2.86E-12       | DPP4          |
| ENSG00000156463    | -5.174        | 1.46E-05       | SH3RF2        |
| ENSG00000075461    | -4.807        | 1.22E-06       | CACNG4        |
| ENSG00000187398    | -4.608        | 7.92E-08       | LUZP2         |
| ENSG00000135063    | -4.449        | 2.47E-08       | FAM189A2      |
| ENSG00000088992    | -4.371        | 2.45E-09       | TESC          |
| ENSG00000163492    | -4.017        | 2.24E-04       | CCDC141       |
| ENSG00000162398    | -3.993        | 5.65E-04       | LEXM          |
| ENSG00000155926    | -3.993        | 4.08E-04       | SLA           |
| ENSG00000213892    | -3.961        | 3.38E-04       | CEACAM16      |
| ENSG00000171885    | -3.780        | 8.29E-04       | AQP4          |
| ENSG00000115263    | -3.729        | 7.43E-04       | GCG           |
| ENSG00000107742    | -3.679        | 4.70E-10       | SPOCK2        |
| ENSG00000128422    | -3.528        | 4.28E-03       | KRT17         |
| ENSG00000164326    | -3.365        | 1.42E-03       | CARTPT        |
| ENSG00000127954    | -3.360        | 4.38E-12       | STEAP4        |
| ENSG00000148702    | -3.333        | 2.40E-04       | HABP2         |
| ENSG00000158164    | -3.306        | 9.76E-05       | TMSB15A       |
| ENSG00000224223    | -3.293        | 4.78E-04       | VSTM2A-OT1    |
| ENSG00000187186    | -3.236        | 6.20E-03       | LOC730098     |
| ENSG00000166546    | -3.128        | 3.09E-07       | BEAN1         |
| ENSG00000212122    | -3.109        | 4.26E-03       | TSSK1B        |
| ENSG00000147234    | -3.075        | 1.23E-05       | FRMPD3        |
| ENSG00000171234    | -3.047        | 3.80E-04       | UGT2B7        |
| ENSG00000112183    | -3.038        | 1.59E-05       | RBM24         |
| ENSG00000165092    | -3.018        | 2.45E-08       | ALDH1A1       |
| ENSG00000204257    | -2.988        | 4.54E-09       | HLA-DMA       |
| ENSG00000186847    | -2.946        | 1.12E-04       | KRT14         |
| ENSG00000237654    | -2.944        | 1.31E-08       | LOC101929653  |
| ENSG00000196482    | -2.943        | 2.37E-08       | ESRRG         |
| ENSG00000138646    | -2.922        | 2.26E-05       | HERC5         |

|                 |        |          |              |
|-----------------|--------|----------|--------------|
| ENSG00000184221 | -2.884 | 6.80E-03 | OLIG1        |
| ENSG00000070526 | -2.835 | 4.39E-07 | ST6GALNAC1   |
| ENSG00000149256 | -2.771 | 1.19E-05 | TENM4        |
| ENSG00000172771 | -2.764 | 5.88E-04 | EFCAB12      |
| ENSG00000225805 | -2.734 | 7.44E-03 | LOC100129216 |
| ENSG00000010319 | -2.685 | 1.18E-03 | SEMA3G       |
| ENSG00000183850 | -2.661 | 1.66E-03 | ZNF730       |
| ENSG00000197977 | -2.649 | 1.18E-09 | ELOVL2       |
| ENSG00000124490 | -2.640 | 1.48E-04 | CRISP2       |
| ENSG00000133808 | -2.608 | 1.09E-05 | MICALCL      |
| ENSG00000188153 | -2.602 | 9.02E-10 | COL4A5       |
| ENSG00000059804 | -2.592 | 7.88E-06 | SLC2A3       |
| ENSG00000116133 | -2.581 | 4.19E-08 | DHCR24       |
| ENSG00000074219 | -2.575 | 8.06E-03 | TEAD2        |
| ENSG00000154065 | -2.566 | 8.26E-08 | ANKRD29      |
| ENSG00000198643 | -2.562 | 4.43E-03 | FAM3D        |
| ENSG00000156096 | -2.533 | 4.34E-06 | UGT2B4       |
| ENSG00000180875 | -2.522 | 4.05E-04 | GREM2        |
| ENSG00000107249 | -2.462 | 1.07E-04 | GLIS3        |
| ENSG00000042832 | -2.461 | 6.36E-08 | TG           |
| ENSG00000134531 | -2.424 | 9.02E-03 | EMP1         |
| ENSG00000197301 | -2.407 | 5.82E-03 | LOC100129940 |
| ENSG00000018408 | -2.405 | 8.19E-06 | WWTR1        |
| ENSG00000119139 | -2.379 | 2.52E-05 | TJP2         |
| ENSG00000053747 | -2.354 | 1.32E-12 | LAMA3        |
| ENSG00000113396 | -2.351 | 5.65E-05 | SLC27A6      |
| ENSG00000165023 | -2.344 | 2.42E-08 | DIRAS2       |
| ENSG00000173482 | -2.325 | 6.46E-07 | PTPRM        |
| ENSG00000095303 | -2.290 | 5.43E-06 | PTGS1        |
| ENSG00000138356 | -2.273 | 1.08E-04 | AOX1         |
| ENSG00000133816 | -2.259 | 4.18E-09 | MICAL2       |
| ENSG00000143797 | -2.247 | 3.11E-12 | MBOAT2       |
| ENSG00000139117 | -2.246 | 2.35E-03 | CPNE8        |
| ENSG00000157613 | -2.229 | 4.74E-07 | CREB3L1      |
| ENSG00000076716 | -2.219 | 7.83E-05 | GPC4         |
| ENSG00000110799 | -2.201 | 3.59E-05 | VWF          |
| ENSG00000215397 | -2.200 | 1.35E-03 | SCRT2        |
| ENSG00000187123 | -2.195 | 3.20E-05 | LYPD6        |
| ENSG00000224795 | -2.193 | 4.84E-04 | NTM-AS1      |



|                 |        |          |            |
|-----------------|--------|----------|------------|
| ENSG00000149218 | -2.190 | 1.63E-08 | ENDOD1     |
| ENSG00000133083 | -2.170 | 1.91E-07 | DCLK1      |
| ENSG00000207704 | -2.167 | 9.83E-03 | MIR548D1   |
| ENSG00000068078 | -2.152 | 1.13E-07 | FGFR3      |
| ENSG00000170579 | -2.148 | 9.51E-05 | DLGAP1     |
| ENSG00000185686 | -2.148 | 3.47E-05 | PRAME      |
| ENSG00000155368 | -2.140 | 1.72E-07 | DBI        |
| ENSG00000162174 | -2.133 | 5.36E-09 | ASRGL1     |
| ENSG00000113924 | -2.130 | 2.37E-08 | HGD        |
| ENSG00000144481 | -2.122 | 4.98E-08 | TRPM8      |
| ENSG00000196091 | -2.120 | 1.32E-06 | MYBPC1     |
| ENSG00000109452 | -2.112 | 2.56E-03 | INPP4B     |
| ENSG00000115361 | -2.107 | 5.83E-03 | ACADL      |
| ENSG00000164211 | -2.101 | 9.06E-05 | STARD4     |
| ENSG00000224973 | -2.096 | 1.65E-03 | LARGE-AS1  |
| ENSG00000104205 | -2.095 | 5.72E-06 | SGK3       |
| ENSG00000204128 | -2.083 | 2.32E-03 | C2orf72    |
| ENSG00000104415 | -2.061 | 3.29E-04 | WISP1      |
| ENSG00000117519 | -2.055 | 1.27E-06 | CNN3       |
| ENSG00000206190 | -2.055 | 2.15E-05 | ATP10A     |
| ENSG00000174370 | -2.046 | 9.59E-03 | C11orf45   |
| ENSG00000166741 | -2.016 | 1.02E-05 | NNMT       |
| ENSG00000059377 | -1.991 | 9.05E-08 | TBXAS1     |
| ENSG00000128591 | -1.976 | 2.44E-04 | FLNC       |
| ENSG00000131844 | -1.974 | 2.38E-06 | MCCC2      |
| ENSG00000164946 | -1.965 | 1.69E-06 | FREM1      |
| ENSG00000133121 | -1.965 | 4.05E-06 | STARD13    |
| ENSG00000136720 | -1.939 | 2.09E-08 | HS6ST1     |
| ENSG00000081277 | -1.938 | 1.01E-09 | PKP1       |
| ENSG00000149970 | -1.937 | 2.30E-07 | CNKSR2     |
| ENSG00000182667 | -1.903 | 1.00E-05 | NTM        |
| ENSG00000111846 | -1.902 | 3.98E-05 | GCNT2      |
| ENSG00000113083 | -1.900 | 5.33E-05 | LOX        |
| ENSG00000158747 | -1.895 | 1.92E-06 | NBL1       |
| ENSG00000079616 | -1.889 | 1.92E-10 | KIF22      |
| ENSG00000180891 | -1.875 | 4.88E-05 | CUEDC1     |
| ENSG00000172296 | -1.870 | 9.88E-05 | SPTLC3     |
| ENSG00000236467 | -1.870 | 2.32E-05 | KCNMA1-AS1 |
| ENSG00000101670 | -1.849 | 2.12E-09 | LIPG       |

|                 |        |          |            |
|-----------------|--------|----------|------------|
| ENSG00000091129 | -1.806 | 3.48E-09 | NRCAM      |
| ENSG00000163472 | -1.805 | 1.41E-07 | TMEM79     |
| ENSG00000171388 | -1.803 | 5.01E-06 | APLN       |
| ENSG00000149150 | -1.785 | 2.27E-09 | SLC43A1    |
| ENSG00000111341 | -1.783 | 1.08E-03 | MGP        |
| ENSG00000142798 | -1.781 | 1.61E-10 | HSPG2      |
| ENSG00000016402 | -1.780 | 2.70E-06 | IL20RA     |
| ENSG00000102024 | -1.771 | 1.61E-03 | PLS3       |
| ENSG00000177076 | -1.767 | 4.01E-05 | ACER2      |
| ENSG00000155629 | -1.765 | 5.06E-08 | PIK3AP1    |
| ENSG00000168077 | -1.762 | 2.81E-03 | SCARA3     |
| ENSG00000196747 | -1.742 | 4.82E-06 | HIST1H2AI  |
| ENSG00000145703 | -1.740 | 7.25E-08 | IQGAP2     |
| ENSG00000134824 | -1.739 | 4.67E-05 | FADS2      |
| ENSG00000129521 | -1.728 | 1.66E-03 | EGLN3      |
| ENSG00000187942 | -1.701 | 1.59E-03 | LDLRAD2    |
| ENSG00000141401 | -1.701 | 1.62E-04 | IMPA2      |
| ENSG00000162733 | -1.698 | 6.69E-05 | DDR2       |
| ENSG00000106541 | -1.698 | 6.71E-07 | AGR2       |
| ENSG00000136378 | -1.679 | 4.49E-03 | ADAMTS7    |
| ENSG00000170011 | -1.679 | 1.22E-07 | MYRIP      |
| ENSG00000154274 | -1.678 | 2.30E-06 | C4orf19    |
| ENSG00000089356 | -1.672 | 4.63E-05 | FXYD3      |
| ENSG00000128596 | -1.659 | 1.14E-05 | CCDC136    |
| ENSG00000156535 | -1.647 | 1.40E-03 | CD109      |
| ENSG00000079337 | -1.637 | 4.72E-07 | RAPGEF3    |
| ENSG00000225497 | -1.625 | 1.20E-03 | KCNMA1-AS2 |
| ENSG00000196187 | -1.620 | 2.87E-08 | TMEM63A    |
| ENSG00000100170 | -1.616 | 7.32E-03 | SLC5A1     |
| ENSG00000103460 | -1.615 | 1.08E-06 | TOX3       |
| ENSG00000169860 | -1.608 | 3.11E-04 | P2RY1      |
| ENSG00000154640 | -1.608 | 1.47E-06 | BTG3       |
| ENSG00000164220 | -1.598 | 1.63E-04 | F2RL2      |
| ENSG00000168078 | -1.592 | 3.72E-05 | PBK        |
| ENSG00000060138 | -1.582 | 1.87E-09 | YBX3       |
| ENSG00000133424 | -1.580 | 2.45E-04 | LARGE1     |
| ENSG00000182621 | -1.580 | 9.38E-08 | PLCB1      |
| ENSG00000124256 | -1.572 | 6.74E-03 | ZBP1       |
| ENSG00000128294 | -1.571 | 5.86E-04 | TPST2      |

|                 |        |          |           |
|-----------------|--------|----------|-----------|
| ENSG00000238105 | -1.569 | 2.66E-03 | GOLGA2P5  |
| ENSG00000112414 | -1.567 | 2.23E-05 | ADGRG6    |
| ENSG00000141441 | -1.565 | 7.50E-04 | GAREM1    |
| ENSG00000122863 | -1.560 | 5.32E-05 | CHST3     |
| ENSG00000174804 | -1.559 | 1.99E-07 | FZD4      |
| ENSG00000126016 | -1.556 | 4.38E-03 | AMOT      |
| ENSG00000119514 | -1.549 | 1.53E-04 | GALNT12   |
| ENSG00000124575 | -1.533 | 1.10E-06 | HIST1H1D  |
| ENSG00000008513 | -1.526 | 6.12E-04 | ST3GAL1   |
| ENSG00000111110 | -1.521 | 1.88E-09 | PPM1H     |
| ENSG00000141098 | -1.506 | 5.43E-07 | GFOD2     |
| ENSG00000100031 | -1.497 | 1.02E-04 | GGT1      |
| ENSG00000182718 | -1.485 | 3.81E-04 | ANXA2     |
| ENSG00000185130 | -1.483 | 6.69E-03 | HIST1H2BL |
| ENSG00000115758 | -1.481 | 3.18E-08 | ODC1      |
| ENSG00000184270 | -1.471 | 9.68E-04 | HIST2H2AB |
| ENSG00000185811 | -1.471 | 3.16E-07 | IKZF1     |
| ENSG00000151503 | -1.467 | 1.07E-09 | NCAPD3    |
| ENSG00000078898 | -1.465 | 7.94E-03 | BPIFB2    |
| ENSG00000138641 | -1.461 | 5.63E-08 | HERC3     |
| ENSG00000176485 | -1.459 | 6.57E-07 | PLA2G16   |
| ENSG00000164120 | -1.453 | 1.65E-05 | HPGD      |
| ENSG00000185905 | -1.449 | 2.97E-03 | C16orf54  |
| ENSG00000131981 | -1.447 | 9.81E-03 | LGALS3    |
| ENSG00000105048 | -1.445 | 6.06E-03 | TNNT1     |
| ENSG00000186204 | -1.445 | 8.93E-06 | CYP4F12   |
| ENSG00000072864 | -1.430 | 1.55E-04 | NDE1      |
| ENSG00000176383 | -1.406 | 7.46E-03 | B3GNT4    |
| ENSG00000155850 | -1.393 | 4.52E-09 | SLC26A2   |
| ENSG00000175175 | -1.392 | 4.84E-07 | PPM1E     |
| ENSG00000153208 | -1.377 | 1.62E-06 | MERTK     |
| ENSG00000026652 | -1.374 | 8.92E-05 | AGPAT4    |
| ENSG00000217555 | -1.373 | 2.89E-05 | CKLF      |
| ENSG00000072571 | -1.372 | 1.65E-04 | HMMR      |
| ENSG00000188290 | -1.368 | 3.15E-04 | HES4      |
| ENSG00000163535 | -1.367 | 2.51E-05 | SGO2      |
| ENSG00000163251 | -1.358 | 2.80E-07 | FZD5      |
| ENSG00000197588 | -1.358 | 4.53E-04 | KLKP1     |
| ENSG00000138061 | -1.352 | 9.94E-08 | CYP1B1    |

|                 |        |          |           |
|-----------------|--------|----------|-----------|
| ENSG00000128253 | -1.351 | 2.63E-04 | RFPL2     |
| ENSG00000117143 | -1.349 | 4.48E-08 | UAP1      |
| ENSG00000183598 | -1.344 | 8.27E-04 | HIST2H3D  |
| ENSG00000225479 | -1.342 | 4.23E-03 | PLCB1-IT1 |
| ENSG00000119899 | -1.340 | 1.88E-04 | SLC17A5   |
| ENSG00000089505 | -1.328 | 7.65E-03 | CMTM1     |
| ENSG00000123219 | -1.326 | 4.40E-05 | CENPK     |
| ENSG00000115267 | -1.317 | 3.69E-04 | IFIH1     |
| ENSG00000125257 | -1.313 | 5.58E-09 | ABCC4     |
| ENSG00000164330 | -1.311 | 5.65E-04 | EBF1      |
| ENSG00000161905 | -1.311 | 4.55E-03 | ALOX15    |
| ENSG00000129173 | -1.304 | 5.28E-05 | E2F8      |
| ENSG00000211445 | -1.304 | 1.74E-05 | GPX3      |
| ENSG00000071205 | -1.303 | 1.06E-03 | ARHGAP10  |
| ENSG00000099194 | -1.303 | 1.04E-05 | SCD       |
| ENSG00000137880 | -1.299 | 9.55E-04 | GCHFR     |
| ENSG00000151929 | -1.298 | 1.21E-03 | BAG3      |
| ENSG00000112769 | -1.298 | 1.46E-03 | LAMA4     |
| ENSG00000157343 | -1.293 | 1.03E-03 | ARMC12    |
| ENSG00000136383 | -1.291 | 2.25E-06 | ALPK3     |
| ENSG00000173210 | -1.287 | 9.61E-06 | ABLIM3    |
| ENSG00000148123 | -1.284 | 7.32E-04 | PLPPR1    |
| ENSG00000197409 | -1.278 | 7.80E-05 | HIST1H3D  |
| ENSG00000165244 | -1.278 | 1.72E-04 | ZNF367    |
| ENSG00000125844 | -1.277 | 9.07E-07 | RRBP1     |
| ENSG00000143995 | -1.272 | 1.97E-05 | MEIS1     |
| ENSG00000184731 | -1.269 | 1.63E-05 | FAM110C   |
| ENSG00000188848 | -1.268 | 1.80E-06 | BEND4     |
| ENSG00000129195 | -1.268 | 1.30E-03 | PIMREG    |
| ENSG00000165424 | -1.264 | 3.55E-03 | ZCCHC24   |
| ENSG00000184454 | -1.261 | 8.24E-03 | NCMAP     |
| ENSG00000116791 | -1.260 | 5.25E-03 | CRYZ      |
| ENSG00000078725 | -1.259 | 9.24E-03 | BRINP1    |
| ENSG00000170270 | -1.258 | 3.23E-03 | GON7      |
| ENSG00000156284 | -1.256 | 6.17E-05 | CLDN8     |
| ENSG00000123983 | -1.255 | 3.89E-08 | ACSL3     |
| ENSG00000136237 | -1.249 | 2.73E-05 | RAPGEF5   |
| ENSG00000166833 | -1.249 | 9.82E-07 | NAV2      |
| ENSG00000142513 | -1.248 | 6.72E-07 | ACPT      |

|                 |        |          |            |
|-----------------|--------|----------|------------|
| ENSG00000171877 | -1.247 | 1.97E-04 | FRMD5      |
| ENSG00000165304 | -1.237 | 3.94E-05 | MELK       |
| ENSG00000165490 | -1.235 | 1.41E-03 | DDIAS      |
| ENSG00000112343 | -1.234 | 4.51E-05 | TRIM38     |
| ENSG00000065357 | -1.234 | 1.70E-03 | DGKA       |
| ENSG00000123374 | -1.234 | 3.76E-05 | CDK2       |
| ENSG00000107821 | -1.233 | 4.58E-04 | KAZALD1    |
| ENSG00000134240 | -1.232 | 4.09E-03 | HMGCS2     |
| ENSG00000100162 | -1.222 | 9.08E-04 | CENPM      |
| ENSG00000010278 | -1.222 | 7.73E-07 | CD9        |
| ENSG00000152583 | -1.220 | 3.20E-03 | SPARCL1    |
| ENSG00000214357 | -1.213 | 2.61E-05 | NEURL1B    |
| ENSG00000165891 | -1.212 | 4.42E-04 | E2F7       |
| ENSG00000128487 | -1.212 | 2.12E-06 | SPECC1     |
| ENSG00000154639 | -1.211 | 2.40E-07 | CXADR      |
| ENSG00000168528 | -1.209 | 8.27E-05 | SERINC2    |
| ENSG00000167900 | -1.205 | 2.26E-06 | TK1        |
| ENSG00000233822 | -1.200 | 1.02E-04 | HIST1H2BN  |
| ENSG00000156113 | -1.197 | 1.48E-08 | KCNMA1     |
| ENSG00000223865 | -1.193 | 5.79E-03 | HLA-DPB1   |
| ENSG00000096060 | -1.190 | 2.98E-05 | FKBP5      |
| ENSG00000108960 | -1.190 | 8.72E-05 | MMD        |
| ENSG00000158406 | -1.189 | 2.01E-05 | HIST1H4H   |
| ENSG00000082196 | -1.189 | 1.51E-05 | C1QTNF3    |
| ENSG00000101057 | -1.188 | 1.88E-04 | MYBL2      |
| ENSG00000124762 | -1.186 | 2.63E-03 | CDKN1A     |
| ENSG00000149798 | -1.184 | 1.38E-06 | CDC42EP2   |
| ENSG00000136122 | -1.184 | 5.66E-03 | BORA       |
| ENSG00000106537 | -1.184 | 5.46E-07 | TSPAN13    |
| ENSG00000111845 | -1.184 | 6.12E-03 | PAK1IP1    |
| ENSG00000110092 | -1.183 | 5.20E-09 | CCND1      |
| ENSG00000177432 | -1.180 | 1.08E-03 | NAP1L5     |
| ENSG00000115008 | -1.179 | 3.14E-03 | IL1A       |
| ENSG00000135362 | -1.178 | 9.15E-03 | PRR5L      |
| ENSG00000185480 | -1.176 | 2.47E-04 | PARPBP     |
| ENSG00000226887 | -1.173 | 7.94E-03 | ERVMER34-1 |
| ENSG00000177283 | -1.171 | 2.74E-07 | FZD8       |
| ENSG00000187676 | -1.168 | 1.37E-03 | B3GLCT     |
| ENSG00000124635 | -1.167 | 1.09E-04 | HIST1H2BJ  |

|                 |        |          |           |
|-----------------|--------|----------|-----------|
| ENSG00000134762 | -1.167 | 1.46E-06 | DSC3      |
| ENSG00000038210 | -1.166 | 3.88E-04 | PI4K2B    |
| ENSG00000096006 | -1.165 | 1.16E-04 | CRISP3    |
| ENSG00000167371 | -1.155 | 2.17E-06 | PRRT2     |
| ENSG00000172349 | -1.155 | 9.84E-03 | IL16      |
| ENSG00000171241 | -1.151 | 1.99E-03 | SHCBP1    |
| ENSG00000198805 | -1.150 | 7.25E-03 | PNP       |
| ENSG00000197903 | -1.150 | 1.09E-05 | HIST1H2BK |
| ENSG00000126787 | -1.148 | 1.79E-04 | DLGAP5    |
| ENSG00000101447 | -1.145 | 1.34E-04 | FAM83D    |
| ENSG00000149485 | -1.144 | 8.67E-05 | FADS1     |
| ENSG00000184661 | -1.142 | 5.35E-04 | CDCA2     |
| ENSG00000224057 | -1.140 | 9.07E-03 | EGFR-AS1  |
| ENSG00000186193 | -1.138 | 2.31E-06 | SAPCD2    |
| ENSG00000058668 | -1.133 | 1.47E-06 | ATP2B4    |
| ENSG00000103222 | -1.132 | 4.04E-06 | ABCC1     |
| ENSG00000077782 | -1.131 | 1.92E-07 | FGFR1     |
| ENSG00000135842 | -1.128 | 2.32E-04 | FAM129A   |
| ENSG00000159784 | -1.126 | 1.87E-03 | FAM131B   |
| ENSG00000138180 | -1.123 | 7.28E-04 | CEP55     |
| ENSG00000167553 | -1.119 | 9.18E-06 | TUBA1C    |
| ENSG00000139194 | -1.114 | 4.63E-03 | RBP5      |
| ENSG00000075218 | -1.113 | 3.63E-04 | GTSE1     |
| ENSG00000088325 | -1.112 | 1.59E-05 | TPX2      |
| ENSG00000122952 | -1.112 | 7.96E-05 | ZWINT     |
| ENSG00000086570 | -1.110 | 1.06E-04 | FAT2      |
| ENSG00000111664 | -1.109 | 5.87E-03 | GNB3      |
| ENSG00000198947 | -1.108 | 9.39E-03 | DMD       |
| ENSG00000141664 | -1.106 | 2.23E-06 | ZCCHC2    |
| ENSG00000197256 | -1.106 | 5.50E-04 | KANK2     |
| ENSG00000105219 | -1.103 | 4.71E-03 | CNTD2     |
| ENSG00000090889 | -1.103 | 6.73E-05 | KIF4A     |
| ENSG00000204899 | -1.099 | 1.16E-03 | MZT1      |
| ENSG00000065534 | -1.098 | 1.28E-04 | MYLK      |
| ENSG00000198121 | -1.098 | 2.64E-03 | LPAR1     |
| ENSG00000110080 | -1.094 | 7.89E-04 | ST3GAL4   |
| ENSG00000148671 | -1.094 | 1.94E-05 | ADIRF     |
| ENSG00000070882 | -1.094 | 3.85E-05 | OSBPL3    |
| ENSG00000169684 | -1.090 | 3.08E-03 | CHRNA5    |

|                 |        |          |           |
|-----------------|--------|----------|-----------|
| ENSG00000146648 | -1.089 | 1.38E-05 | EGFR      |
| ENSG00000183960 | -1.088 | 8.02E-05 | KCNH8     |
| ENSG00000148737 | -1.082 | 8.22E-04 | TCF7L2    |
| ENSG00000113368 | -1.079 | 5.49E-05 | LMNB1     |
| ENSG00000139734 | -1.078 | 4.35E-04 | DIAPH3    |
| ENSG00000166263 | -1.076 | 2.65E-05 | STXBP4    |
| ENSG00000134057 | -1.076 | 1.02E-04 | CCNB1     |
| ENSG00000076641 | -1.075 | 1.51E-04 | PAG1      |
| ENSG00000115163 | -1.074 | 2.10E-03 | CENPA     |
| ENSG00000140931 | -1.074 | 1.40E-05 | CMTM3     |
| ENSG00000160752 | -1.071 | 9.06E-04 | FDPS      |
| ENSG00000150893 | -1.068 | 7.72E-05 | FREM2     |
| ENSG00000104332 | -1.065 | 6.04E-04 | SFRP1     |
| ENSG00000197496 | -1.065 | 1.09E-03 | SLC2A10   |
| ENSG00000135127 | -1.061 | 7.10E-06 | BICDL1    |
| ENSG00000163629 | -1.059 | 4.10E-06 | PTPN13    |
| ENSG00000171444 | -1.050 | 3.82E-05 | MCC       |
| ENSG00000051128 | -1.049 | 6.86E-03 | HOMER3    |
| ENSG00000024526 | -1.048 | 3.04E-04 | DEPDC1    |
| ENSG00000132669 | -1.047 | 1.17E-05 | RIN2      |
| ENSG00000149554 | -1.046 | 1.07E-04 | CHEK1     |
| ENSG00000175643 | -1.046 | 9.58E-04 | RMI2      |
| ENSG00000064666 | -1.045 | 8.02E-03 | CNN2      |
| ENSG00000141179 | -1.043 | 2.47E-04 | PCTP      |
| ENSG00000117791 | -1.039 | 1.40E-03 | MARC2     |
| ENSG00000131781 | -1.036 | 6.35E-03 | FMO5      |
| ENSG00000170312 | -1.035 | 3.17E-04 | CDK1      |
| ENSG00000186185 | -1.032 | 7.69E-05 | KIF18B    |
| ENSG00000187951 | -1.032 | 3.49E-04 | ARHGAP11B |
| ENSG00000061656 | -1.032 | 8.59E-04 | SPAG4     |
| ENSG00000197472 | -1.029 | 1.25E-03 | ZNF695    |
| ENSG00000115738 | -1.026 | 3.98E-04 | ID2       |
| ENSG00000117399 | -1.025 | 1.15E-03 | CDC20     |
| ENSG00000117650 | -1.024 | 1.50E-03 | NEK2      |
| ENSG00000132294 | -1.024 | 5.44E-06 | EFR3A     |
| ENSG00000152894 | -1.023 | 1.54E-05 | PTPRK     |
| ENSG00000178878 | -1.023 | 4.37E-03 | APOLD1    |
| ENSG00000186480 | -1.023 | 4.63E-04 | INSIG1    |
| ENSG00000156802 | -1.022 | 7.27E-06 | ATAD2     |

|                 |        |          |           |
|-----------------|--------|----------|-----------|
| ENSG00000029993 | -1.021 | 4.15E-03 | HMGB3     |
| ENSG00000164181 | -1.015 | 3.35E-05 | ELOVL7    |
| ENSG00000197238 | -1.013 | 2.58E-04 | HIST1H4J  |
| ENSG00000160336 | -1.013 | 5.84E-08 | ZNF761    |
| ENSG00000078900 | -1.012 | 1.41E-03 | TP73      |
| ENSG00000167799 | -1.009 | 5.25E-03 | NUDT8     |
| ENSG00000005189 | -1.009 | 1.61E-03 | LOC81691  |
| ENSG00000123643 | -1.009 | 8.08E-06 | SLC36A1   |
| ENSG00000138346 | -1.008 | 1.86E-04 | DNA2      |
| ENSG00000111249 | -1.005 | 2.74E-05 | CUX2      |
| ENSG00000136826 | -1.003 | 1.89E-03 | KLF4      |
| ENSG00000156970 | -1.003 | 7.83E-05 | BUB1B     |
| ENSG00000105011 | -1.001 | 1.13E-03 | ASF1B     |
| ENSG00000186153 | 1.002  | 2.11E-03 | WWOX      |
| ENSG00000144802 | 1.002  | 1.39E-03 | NFKBIZ    |
| ENSG00000183798 | 1.009  | 7.93E-03 | EMILIN3   |
| ENSG00000124788 | 1.011  | 2.45E-05 | ATXN1     |
| ENSG00000145911 | 1.012  | 1.62E-03 | N4BP3     |
| ENSG00000215417 | 1.014  | 2.90E-03 | MIR17     |
| ENSG00000128641 | 1.018  | 2.22E-06 | MYO1B     |
| ENSG00000104312 | 1.019  | 5.10E-04 | RIPK2     |
| ENSG00000157423 | 1.021  | 6.96E-03 | HYDIN     |
| ENSG00000170382 | 1.023  | 9.91E-03 | LRRN2     |
| ENSG00000184368 | 1.023  | 8.32E-03 | MAP7D2    |
| ENSG00000114770 | 1.023  | 1.02E-05 | ABCC5     |
| ENSG00000183778 | 1.025  | 4.29E-04 | B3GALT5   |
| ENSG00000124406 | 1.026  | 5.22E-07 | ATP8A1    |
| ENSG00000200394 | 1.026  | 4.79E-03 | SNORA38B  |
| ENSG00000185112 | 1.029  | 7.47E-06 | FAM43A    |
| ENSG00000099260 | 1.030  | 8.59E-03 | PALMD     |
| ENSG00000100321 | 1.033  | 1.30E-03 | SYNGR1    |
| ENSG00000117472 | 1.035  | 7.51E-06 | TSPAN1    |
| ENSG00000148468 | 1.037  | 1.58E-04 | FAM171A1  |
| ENSG00000182376 | 1.046  | 2.86E-03 | LOC339059 |
| ENSG00000153093 | 1.049  | 1.41E-03 | ACOXL     |
| ENSG00000146411 | 1.052  | 1.43E-03 | SLC2A12   |
| ENSG00000170271 | 1.052  | 2.33E-04 | FAXDC2    |
| ENSG00000176595 | 1.058  | 2.24E-06 | KBTBD11   |
| ENSG00000136167 | 1.060  | 2.93E-06 | LCPI      |



|                 |       |          |         |
|-----------------|-------|----------|---------|
| ENSG00000006283 | 1.060 | 3.47E-04 | CACNA1G |
| ENSG00000176771 | 1.061 | 2.67E-04 | NCKAP5  |
| ENSG00000186063 | 1.063 | 3.46E-03 | AIDA    |
| ENSG00000140479 | 1.066 | 9.45E-04 | PCSK6   |
| ENSG00000206811 | 1.069 | 2.57E-04 | SNORA10 |
| ENSG00000028839 | 1.073 | 5.81E-04 | TBPL1   |
| ENSG00000112796 | 1.075 | 7.37E-04 | ENPP5   |
| ENSG00000110013 | 1.076 | 4.33E-03 | SIAE    |
| ENSG00000179915 | 1.080 | 3.70E-05 | NRXN1   |
| ENSG00000132821 | 1.083 | 8.36E-04 | VSTM2L  |
| ENSG00000188385 | 1.083 | 2.73E-05 | JAKMIP3 |
| ENSG00000158445 | 1.087 | 3.29E-04 | KCNB1   |
| ENSG00000177839 | 1.092 | 3.07E-03 | PCDHB9  |
| ENSG00000131951 | 1.092 | 7.93E-03 | LRRC9   |
| ENSG00000206597 | 1.093 | 2.82E-04 | SNORA57 |
| ENSG00000023445 | 1.094 | 2.24E-03 | BIRC3   |
| ENSG00000204624 | 1.097 | 2.67E-05 | DISP3   |
| ENSG00000150510 | 1.099 | 4.44E-03 | FAM124A |
| ENSG00000164488 | 1.102 | 1.26E-03 | DACT2   |
| ENSG00000138079 | 1.106 | 2.17E-03 | SLC3A1  |
| ENSG00000145920 | 1.113 | 1.71E-04 | CPLX2   |
| ENSG00000150995 | 1.113 | 3.13E-07 | ITPR1   |
| ENSG00000124496 | 1.115 | 5.28E-06 | TRERF1  |
| ENSG00000116396 | 1.117 | 5.15E-06 | KCNC4   |
| ENSG00000172819 | 1.121 | 6.85E-03 | RARG    |
| ENSG00000196284 | 1.122 | 7.23E-04 | SUPT3H  |
| ENSG00000187672 | 1.123 | 3.98E-04 | ERC2    |
| ENSG00000111912 | 1.125 | 1.21E-03 | NCOA7   |
| ENSG00000180914 | 1.128 | 9.56E-03 | OXTR    |
| ENSG00000124743 | 1.129 | 3.12E-03 | KLHL31  |
| ENSG00000101493 | 1.132 | 1.87E-03 | ZNF516  |
| ENSG00000060709 | 1.138 | 9.56E-08 | RIMBP2  |
| ENSG00000196132 | 1.139 | 1.42E-07 | MYT1    |
| ENSG00000169862 | 1.142 | 3.45E-05 | CTNND2  |
| ENSG00000137968 | 1.147 | 1.62E-06 | SLC44A5 |
| ENSG00000163531 | 1.161 | 1.17E-06 | NFASC   |
| ENSG00000068831 | 1.164 | 7.45E-03 | RASGRP2 |
| ENSG00000157214 | 1.166 | 7.82E-06 | STEAP2  |
| ENSG00000142178 | 1.168 | 4.21E-04 | SIK1    |

|                 |       |          |           |
|-----------------|-------|----------|-----------|
| ENSG00000152582 | 1.171 | 3.10E-04 | SPEF2     |
| ENSG00000075426 | 1.174 | 2.02E-06 | FOSL2     |
| ENSG00000076706 | 1.181 | 2.21E-03 | MCAM      |
| ENSG00000020181 | 1.182 | 2.86E-03 | ADGRA2    |
| ENSG00000157734 | 1.189 | 4.42E-05 | SNX22     |
| ENSG00000113212 | 1.192 | 3.36E-03 | PCDHB7    |
| ENSG00000183837 | 1.193 | 4.44E-05 | PNMA3     |
| ENSG00000198478 | 1.194 | 2.01E-04 | SH3BGRL2  |
| ENSG00000106829 | 1.195 | 8.57E-03 | TLE4      |
| ENSG00000114248 | 1.197 | 7.49E-03 | LRRC31    |
| ENSG00000198719 | 1.200 | 1.81E-04 | DLL1      |
| ENSG00000143079 | 1.203 | 1.25E-07 | CTTNBP2NL |
| ENSG00000165029 | 1.204 | 3.18E-03 | ABCA1     |
| ENSG00000090971 | 1.206 | 1.13E-03 | NAT14     |
| ENSG00000163884 | 1.207 | 3.71E-05 | KLF15     |
| ENSG00000081181 | 1.215 | 2.44E-05 | ARG2      |
| ENSG00000137571 | 1.220 | 1.82E-05 | SLCO5A1   |
| ENSG00000134780 | 1.220 | 2.77E-03 | DAGLA     |
| ENSG00000185303 | 1.223 | 1.54E-04 | SFTPA2    |
| ENSG00000122585 | 1.223 | 7.39E-03 | NPY       |
| ENSG00000131711 | 1.225 | 5.39E-05 | MAP1B     |
| ENSG00000181264 | 1.226 | 1.77E-06 | TMEM136   |
| ENSG00000012504 | 1.226 | 6.11E-03 | NR1H4     |
| ENSG00000139597 | 1.228 | 8.26E-07 | N4BP2L1   |
| ENSG00000140470 | 1.230 | 8.09E-03 | ADAMTS17  |
| ENSG00000111275 | 1.233 | 1.13E-05 | ALDH2     |
| ENSG00000075391 | 1.238 | 5.71E-04 | RASAL2    |
| ENSG00000116039 | 1.241 | 5.43E-03 | ATP6V1B1  |
| ENSG00000144366 | 1.241 | 1.88E-04 | GULP1     |
| ENSG00000186891 | 1.242 | 5.60E-03 | TNFRSF18  |
| ENSG00000164076 | 1.247 | 6.40E-05 | CAMKV     |
| ENSG00000164125 | 1.248 | 5.30E-07 | FAM198B   |
| ENSG00000165246 | 1.261 | 1.61E-03 | NLGN4Y    |
| ENSG00000184986 | 1.264 | 8.99E-03 | TMEM121   |
| ENSG00000124145 | 1.267 | 3.68E-04 | SDC4      |
| ENSG00000119866 | 1.268 | 1.34E-05 | BCL11A    |
| ENSG00000109794 | 1.286 | 1.32E-04 | FAM149A   |
| ENSG00000153291 | 1.296 | 7.63E-07 | SLC25A27  |
| ENSG00000123094 | 1.298 | 5.38E-05 | RASSF8    |

|                 |       |          |           |
|-----------------|-------|----------|-----------|
| ENSG00000159388 | 1.300 | 2.78E-06 | BTG2      |
| ENSG00000162545 | 1.302 | 4.57E-05 | CAMK2N1   |
| ENSG00000106070 | 1.305 | 1.41E-06 | GRB10     |
| ENSG00000077585 | 1.315 | 3.82E-05 | GPR137B   |
| ENSG00000080854 | 1.333 | 2.29E-07 | IGSF9B    |
| ENSG00000198133 | 1.338 | 5.84E-03 | TMEM229B  |
| ENSG00000165084 | 1.340 | 6.95E-06 | C8orf34   |
| ENSG00000101096 | 1.348 | 2.50E-03 | NFATC2    |
| ENSG00000141540 | 1.353 | 1.16E-03 | TTYH2     |
| ENSG00000144331 | 1.353 | 8.22E-08 | ZNF385B   |
| ENSG00000155980 | 1.357 | 9.15E-05 | KIF5A     |
| ENSG00000100100 | 1.361 | 5.52E-04 | PIK3IP1   |
| ENSG00000003436 | 1.361 | 5.35E-03 | TFPI      |
| ENSG00000143473 | 1.375 | 1.58E-05 | KCNH1     |
| ENSG00000216306 | 1.377 | 4.66E-05 | KRT19P2   |
| ENSG00000079335 | 1.378 | 6.96E-03 | CDC14A    |
| ENSG00000137843 | 1.391 | 1.32E-03 | PAK6      |
| ENSG00000177990 | 1.393 | 5.09E-08 | DPY19L2   |
| ENSG00000113742 | 1.394 | 2.49E-05 | CPEB4     |
| ENSG00000106714 | 1.395 | 8.39E-03 | CNTNAP3   |
| ENSG00000185002 | 1.396 | 3.96E-05 | RFX6      |
| ENSG00000163083 | 1.405 | 7.69E-05 | INHBB     |
| ENSG00000162437 | 1.405 | 9.71E-05 | RAVER2    |
| ENSG00000006210 | 1.421 | 7.26E-04 | CX3CL1    |
| ENSG00000170153 | 1.428 | 9.18E-03 | RNF150    |
| ENSG00000054690 | 1.430 | 6.39E-07 | PLEKHH1   |
| ENSG00000142512 | 1.450 | 3.59E-03 | SIGLEC10  |
| ENSG00000233756 | 1.454 | 1.81E-05 | DSCAM-IT1 |
| ENSG00000165125 | 1.456 | 6.28E-06 | TRPV6     |
| ENSG00000001561 | 1.467 | 2.32E-04 | ENPP4     |
| ENSG00000184185 | 1.477 | 6.57E-05 | KCNJ12    |
| ENSG00000107104 | 1.478 | 1.34E-05 | KANK1     |
| ENSG00000146776 | 1.480 | 7.92E-07 | ATXN7L1   |
| ENSG00000041982 | 1.485 | 2.96E-03 | TNC       |
| ENSG00000146233 | 1.490 | 3.31E-03 | CYP39A1   |
| ENSG00000146070 | 1.505 | 6.80E-06 | PLA2G7    |
| ENSG00000101210 | 1.515 | 1.25E-06 | EEF1A2    |
| ENSG00000115884 | 1.515 | 4.30E-08 | SDC1      |
| ENSG00000148288 | 1.516 | 5.76E-04 | GBGT1     |

|                 |       |          |           |
|-----------------|-------|----------|-----------|
| ENSG00000149212 | 1.520 | 9.36E-05 | SESN3     |
| ENSG00000132872 | 1.533 | 5.96E-06 | SYT4      |
| ENSG00000171680 | 1.550 | 7.76E-04 | PLEKHG5   |
| ENSG00000186197 | 1.551 | 1.75E-03 | EDARADD   |
| ENSG00000100604 | 1.552 | 8.40E-07 | CHGA      |
| ENSG00000164647 | 1.560 | 7.23E-08 | STEAP1    |
| ENSG00000180113 | 1.563 | 1.86E-06 | TDRD6     |
| ENSG00000185950 | 1.568 | 4.24E-07 | IRS2      |
| ENSG00000196557 | 1.574 | 4.48E-07 | CACNA1H   |
| ENSG00000180881 | 1.575 | 8.94E-03 | CAPS2     |
| ENSG00000112320 | 1.577 | 1.58E-04 | SOBP      |
| ENSG00000214456 | 1.579 | 8.12E-03 | PLIN5     |
| ENSG00000168952 | 1.589 | 3.69E-04 | STXBP6    |
| ENSG00000162144 | 1.591 | 4.50E-07 | CYB561A3  |
| ENSG00000169418 | 1.595 | 7.14E-04 | NPR1      |
| ENSG00000167992 | 1.596 | 3.69E-03 | VWCE      |
| ENSG00000139211 | 1.599 | 8.29E-03 | AMIGO2    |
| ENSG00000020577 | 1.599 | 1.42E-06 | SAMD4A    |
| ENSG00000169435 | 1.606 | 7.46E-04 | RASSF6    |
| ENSG00000074211 | 1.610 | 7.21E-05 | PPP2R2C   |
| ENSG00000143502 | 1.619 | 1.24E-06 | SUSD4     |
| ENSG00000214290 | 1.624 | 4.68E-07 | COLCA2    |
| ENSG00000157654 | 1.624 | 1.55E-07 | PALM2     |
| ENSG00000166959 | 1.632 | 5.94E-04 | MS4A8     |
| ENSG00000104722 | 1.633 | 9.85E-05 | NEFM      |
| ENSG00000162981 | 1.635 | 1.09E-04 | FAM84A    |
| ENSG00000137878 | 1.638 | 7.35E-08 | GCOM1     |
| ENSG00000172817 | 1.643 | 1.10E-04 | CYP7B1    |
| ENSG00000128268 | 1.648 | 8.57E-06 | MGAT3     |
| ENSG00000125813 | 1.653 | 5.87E-03 | PAX1      |
| ENSG00000186462 | 1.658 | 1.26E-03 | NAP1L2    |
| ENSG00000173559 | 1.662 | 4.88E-04 | NABP1     |
| ENSG00000173334 | 1.669 | 2.55E-10 | TRIB1     |
| ENSG00000170561 | 1.671 | 4.00E-03 | IRX2      |
| ENSG00000117154 | 1.672 | 4.22E-03 | IGSF21    |
| ENSG00000099250 | 1.677 | 1.63E-09 | NRP1      |
| ENSG00000123201 | 1.682 | 3.62E-03 | GUCY1B2   |
| ENSG00000204314 | 1.682 | 5.72E-03 | PRRT1     |
| ENSG00000184856 | 1.687 | 4.25E-04 | LINC00308 |

|                 |       |          |          |
|-----------------|-------|----------|----------|
| ENSG00000064655 | 1.689 | 9.06E-03 | EYA2     |
| ENSG00000137098 | 1.692 | 3.48E-03 | SPAG8    |
| ENSG00000206503 | 1.700 | 3.40E-03 | HLA-A    |
| ENSG00000119138 | 1.703 | 8.19E-06 | KLF9     |
| ENSG00000112149 | 1.703 | 8.61E-03 | CD83     |
| ENSG00000166840 | 1.708 | 1.23E-04 | GLYATL1  |
| ENSG00000198780 | 1.712 | 4.79E-05 | FAM169A  |
| ENSG00000164749 | 1.714 | 6.05E-04 | HNF4G    |
| ENSG00000143479 | 1.717 | 2.31E-03 | DYRK3    |
| ENSG00000151458 | 1.720 | 1.78E-08 | ANKRD50  |
| ENSG00000166006 | 1.725 | 1.21E-05 | KCNC2    |
| ENSG00000169604 | 1.726 | 1.53E-09 | ANTXR1   |
| ENSG00000165443 | 1.727 | 7.09E-05 | PHYHIPL  |
| ENSG00000162407 | 1.752 | 4.47E-05 | PLPP3    |
| ENSG00000166974 | 1.752 | 2.09E-04 | MAPRE2   |
| ENSG00000171451 | 1.761 | 1.47E-08 | DSEL     |
| ENSG00000219438 | 1.770 | 1.12E-04 | FAM19A5  |
| ENSG00000107954 | 1.775 | 8.69E-06 | NEURL1   |
| ENSG00000160188 | 1.776 | 5.13E-03 | RSPH1    |
| ENSG00000110436 | 1.781 | 2.18E-06 | SLC1A2   |
| ENSG00000196353 | 1.781 | 9.35E-08 | CPNE4    |
| ENSG00000108691 | 1.790 | 1.87E-03 | CCL2     |
| ENSG00000213626 | 1.791 | 2.43E-03 | LBH      |
| ENSG00000197410 | 1.810 | 3.09E-03 | DCHS2    |
| ENSG00000200879 | 1.829 | 7.06E-03 | SNORD14E |
| ENSG00000187634 | 1.832 | 2.29E-04 | SAMD11   |
| ENSG00000082497 | 1.850 | 1.84E-03 | SERTAD4  |
| ENSG00000145439 | 1.854 | 6.15E-09 | CBR4     |
| ENSG00000116729 | 1.854 | 2.01E-04 | WLS      |
| ENSG00000164626 | 1.870 | 2.60E-03 | KCNK5    |
| ENSG00000137198 | 1.874 | 3.77E-07 | GMPR     |
| ENSG00000182870 | 1.879 | 9.66E-03 | GALNT9   |
| ENSG00000188643 | 1.885 | 4.84E-03 | S100A16  |
| ENSG00000070886 | 1.894 | 4.81E-06 | EPHA8    |
| ENSG00000182985 | 1.894 | 1.05E-09 | CADM1    |
| ENSG00000125845 | 1.901 | 5.31E-03 | BMP2     |
| ENSG00000165272 | 1.902 | 5.76E-06 | AQP3     |
| ENSG00000105889 | 1.902 | 5.69E-04 | STEAP1B  |
| ENSG00000186310 | 1.912 | 8.45E-03 | NAP1L3   |

|                 |       |          |           |
|-----------------|-------|----------|-----------|
| ENSG00000182013 | 1.919 | 6.73E-05 | PNMAL1    |
| ENSG00000122756 | 1.937 | 2.40E-04 | CNTFR     |
| ENSG00000126562 | 1.940 | 1.52E-06 | WNK4      |
| ENSG00000238597 | 1.961 | 7.86E-03 | SNORD4B   |
| ENSG00000235123 | 1.971 | 6.64E-03 | DSCAM-AS1 |
| ENSG00000116176 | 1.983 | 5.25E-03 | TPSG1     |
| ENSG00000233215 | 1.984 | 4.20E-08 | LINC01687 |
| ENSG00000158258 | 2.001 | 2.33E-06 | CLSTN2    |
| ENSG00000101871 | 2.005 | 7.76E-09 | MID1      |
| ENSG00000166923 | 2.025 | 7.10E-05 | GREM1     |
| ENSG00000118997 | 2.032 | 4.35E-04 | DNAH7     |
| ENSG00000140968 | 2.034 | 2.98E-05 | IRF8      |
| ENSG00000199094 | 2.037 | 9.20E-03 | MIR30C2   |
| ENSG00000231439 | 2.037 | 2.43E-03 | WASIR2    |
| ENSG00000133639 | 2.038 | 9.49E-09 | BTG1      |
| ENSG00000139970 | 2.052 | 3.29E-04 | RTN1      |
| ENSG00000112139 | 2.080 | 5.84E-03 | MDGA1     |
| ENSG00000125266 | 2.105 | 1.19E-06 | EFNB2     |
| ENSG00000112182 | 2.108 | 1.26E-04 | BACH2     |
| ENSG00000166897 | 2.132 | 2.77E-04 | ELFN2     |
| ENSG00000106686 | 2.132 | 2.11E-06 | SPATA6L   |
| ENSG00000171587 | 2.133 | 8.03E-10 | DSCAM     |
| ENSG00000075223 | 2.133 | 1.67E-06 | SEMA3C    |
| ENSG00000197872 | 2.151 | 7.64E-07 | FAM49A    |
| ENSG00000153234 | 2.177 | 1.49E-03 | NR4A2     |
| ENSG00000166432 | 2.180 | 2.43E-05 | ZMAT1     |
| ENSG00000135374 | 2.188 | 8.73E-03 | ELF5      |
| ENSG00000137727 | 2.188 | 4.12E-08 | ARHGAP20  |
| ENSG00000128714 | 2.224 | 8.64E-03 | HOXD13    |
| ENSG00000223561 | 2.255 | 1.41E-03 | LOC646588 |
| ENSG00000123095 | 2.268 | 5.03E-03 | BHLHE41   |
| ENSG00000157087 | 2.288 | 3.57E-03 | ATP2B2    |
| ENSG00000026508 | 2.291 | 3.24E-05 | CD44      |
| ENSG00000145362 | 2.306 | 2.02E-04 | ANK2      |
| ENSG00000182132 | 2.332 | 1.62E-03 | KCNIP1    |
| ENSG00000132329 | 2.339 | 5.06E-05 | RAMP1     |
| ENSG00000188257 | 2.358 | 2.54E-03 | PLA2G2A   |
| ENSG00000135905 | 2.376 | 1.75E-08 | DOCK10    |
| ENSG00000158270 | 2.419 | 1.20E-07 | COLEC12   |

|                 |       |          |              |
|-----------------|-------|----------|--------------|
| ENSG00000196358 | 2.453 | 8.24E-03 | NTNG2        |
| ENSG00000214039 | 2.461 | 8.22E-05 | LINC02418    |
| ENSG00000236609 | 2.468 | 2.72E-04 | ZNF853       |
| ENSG00000137501 | 2.480 | 5.59E-07 | SYTL2        |
| ENSG00000137801 | 2.481 | 6.84E-08 | THBS1        |
| ENSG00000106123 | 2.501 | 1.99E-09 | EPHB6        |
| ENSG00000134853 | 2.501 | 6.68E-03 | PDGFRA       |
| ENSG00000181467 | 2.523 | 1.56E-08 | RAP2B        |
| ENSG00000110076 | 2.563 | 8.94E-10 | NRXN2        |
| ENSG00000186469 | 2.571 | 6.66E-03 | GNG2         |
| ENSG00000151883 | 2.583 | 2.60E-05 | PARP8        |
| ENSG00000115604 | 2.598 | 4.40E-03 | IL18R1       |
| ENSG00000171951 | 2.602 | 7.05E-04 | SCG2         |
| ENSG00000167680 | 2.635 | 8.41E-03 | SEMA6B       |
| ENSG00000157399 | 2.651 | 8.54E-03 | ARSE         |
| ENSG00000176904 | 2.670 | 9.08E-03 | OR51H1       |
| ENSG00000167332 | 2.675 | 1.77E-04 | OR51E2       |
| ENSG00000116106 | 2.711 | 4.84E-06 | EPHA4        |
| ENSG00000136999 | 2.712 | 8.56E-04 | NOV          |
| ENSG00000168229 | 2.733 | 8.38E-04 | PTGDR        |
| ENSG00000178031 | 2.755 | 4.30E-03 | ADAMTSL1     |
| ENSG00000144583 | 2.766 | 1.50E-05 | MARC4        |
| ENSG00000125384 | 2.817 | 3.40E-08 | PTGER2       |
| ENSG00000151623 | 2.818 | 1.27E-07 | NR3C2        |
| ENSG00000151067 | 2.873 | 1.56E-10 | CACNA1C      |
| ENSG00000002726 | 2.889 | 4.78E-03 | AOC1         |
| ENSG00000069206 | 2.910 | 2.93E-07 | ADAM7        |
| ENSG00000182568 | 2.911 | 4.88E-09 | SATB1        |
| ENSG00000158816 | 2.931 | 3.32E-09 | VWA5B1       |
| ENSG00000228314 | 2.950 | 6.69E-03 | CYP4F29P     |
| ENSG00000131196 | 2.979 | 9.86E-04 | NFATC1       |
| ENSG00000176900 | 3.000 | 3.29E-03 | OR51T1       |
| ENSG00000223764 | 3.019 | 1.37E-04 | LOC100130417 |
| ENSG00000105696 | 3.023 | 6.48E-03 | TMEM59L      |
| ENSG00000086205 | 3.026 | 1.67E-04 | FOLH1        |
| ENSG00000058866 | 3.054 | 9.74E-04 | DGKG         |
| ENSG00000146373 | 3.056 | 3.36E-03 | RNF217       |
| ENSG00000153292 | 3.091 | 5.31E-07 | ADGRF1       |
| ENSG00000197428 | 3.101 | 2.77E-04 | OR51D1       |

|                 |       |          |             |
|-----------------|-------|----------|-------------|
| ENSG00000146674 | 3.114 | 2.74E-03 | IGFBP3      |
| ENSG00000138759 | 3.143 | 9.17E-05 | FRAS1       |
| ENSG00000232125 | 3.194 | 4.07E-03 | DYTN        |
| ENSG00000174948 | 3.198 | 3.12E-03 | GPR149      |
| ENSG00000172348 | 3.235 | 7.16E-05 | RCAN2       |
| ENSG00000111432 | 3.266 | 3.76E-03 | FZD10       |
| ENSG00000176922 | 3.282 | 6.33E-03 | OR51S1      |
| ENSG00000154127 | 3.290 | 7.84E-05 | UBASH3B     |
| ENSG00000163735 | 3.302 | 3.74E-03 | CXCL5       |
| ENSG00000206448 | 3.302 | 2.82E-03 | PPIAP30     |
| ENSG00000167434 | 3.467 | 9.23E-03 | CA4         |
| ENSG00000196090 | 3.530 | 2.38E-03 | PTPRT       |
| ENSG00000162989 | 3.569 | 8.04E-04 | KCNJ3       |
| ENSG00000233705 | 3.598 | 1.87E-03 | SLC26A4-AS1 |
| ENSG00000131477 | 3.607 | 8.84E-04 | RAMP2       |
| ENSG00000232810 | 3.620 | 1.00E-03 | TNF         |
| ENSG00000155886 | 3.651 | 5.89E-04 | SLC24A2     |
| ENSG00000169439 | 3.674 | 3.19E-07 | SDC2        |
| ENSG00000156564 | 3.683 | 3.28E-06 | LRFN2       |
| ENSG00000102837 | 3.693 | 2.18E-03 | OLFM4       |
| ENSG00000183098 | 3.793 | 1.39E-03 | GPC6        |
| ENSG00000198010 | 3.802 | 6.07E-04 | DLGAP2      |
| ENSG00000111319 | 3.816 | 2.11E-03 | SCNN1A      |
| ENSG00000198889 | 3.863 | 1.50E-03 | DCAF12L1    |
| ENSG00000078295 | 3.886 | 9.55E-05 | ADCY2       |
| ENSG00000168772 | 3.991 | 2.29E-04 | CXXC4       |
| ENSG00000135074 | 4.052 | 8.35E-03 | ADAM19      |
| ENSG00000144339 | 4.133 | 6.68E-06 | TMEFF2      |
| ENSG00000180785 | 4.268 | 6.19E-07 | OR51E1      |
| ENSG00000134198 | 4.373 | 2.31E-04 | TSPAN2      |
| ENSG00000169083 | 4.443 | 1.27E-14 | AR          |
| ENSG00000184838 | 4.516 | 2.07E-04 | PRR16       |
| ENSG00000120251 | 6.954 | 7.53E-04 | GRIA2       |



**Supplementary Table S3: Differentially expressed genes in serial biopsies of VCaP xenografts, AER vs. CRPC.** Expression data from RNA sequencing of serial biopsies of VCaP tumors following development of castration resistant prostate cancer (CRPC) and following development of abiraterone plus enzalutamide resistance (AER). log2FC – log2 fold change.

| <b>Ensemble ID</b> | <b>log2FC</b> | <b>P Value</b> | <b>Symbol</b> |
|--------------------|---------------|----------------|---------------|
| ENSG00000155026    | -3.632        | 5.39E-04       | RSPH10B       |
| ENSG00000135063    | -3.248        | 1.92E-03       | FAM189A2      |
| ENSG00000134853    | -3.048        | 1.16E-03       | PDGFRA        |
| ENSG00000224512    | -2.990        | 2.27E-03       | NA            |
| ENSG00000207040    | -2.859        | 3.00E-03       | NA            |
| ENSG00000174473    | -2.846        | 4.57E-03       | GALNTL6       |
| ENSG00000183023    | -2.785        | 4.05E-03       | SLC8A1        |
| ENSG00000238732    | -2.758        | 1.88E-03       | NA            |
| ENSG00000166501    | -2.744        | 4.29E-03       | PRKCB         |
| ENSG00000196628    | -2.440        | 4.68E-03       | TCF4          |
| ENSG00000145147    | -2.374        | 1.70E-03       | SLIT2         |
| ENSG00000147065    | -2.365        | 9.11E-03       | MSN           |
| ENSG00000236581    | -2.287        | 9.63E-03       | STARD13-AS    |
| ENSG00000229751    | -2.277        | 2.17E-03       | NA            |
| ENSG00000187653    | -2.211        | 1.27E-03       | NA            |
| ENSG00000070526    | -2.160        | 1.18E-03       | ST6GALNAC1    |
| ENSG00000048740    | -2.122        | 5.43E-03       | CELF2         |
| ENSG00000144481    | -2.112        | 2.12E-07       | TRPM8         |
| ENSG00000123338    | -2.066        | 9.21E-03       | NCKAP1L       |
| ENSG00000225840    | -2.028        | 8.49E-03       | NA            |
| ENSG00000236150    | -2.027        | 4.18E-03       | NA            |
| ENSG00000225792    | -1.981        | 6.71E-03       | LOC105375304  |
| ENSG00000236646    | -1.895        | 1.98E-03       | NA            |
| ENSG00000175745    | -1.880        | 4.17E-03       | NR2F1         |
| ENSG00000198795    | -1.808        | 5.51E-03       | ZNF521        |
| ENSG00000229132    | -1.792        | 7.78E-03       | NA            |
| ENSG00000171444    | -1.752        | 1.28E-07       | MCC           |
| ENSG00000128284    | -1.728        | 7.77E-05       | APOL3         |
| ENSG00000207082    | -1.719        | 6.04E-03       | NA            |
| ENSG00000165092    | -1.718        | 1.18E-03       | ALDH1A1       |
| ENSG00000214456    | -1.706        | 1.99E-03       | PLIN5         |

|                 |        |          |          |
|-----------------|--------|----------|----------|
| ENSG00000212774 | -1.687 | 8.82E-03 | NA       |
| ENSG00000237115 | -1.638 | 4.96E-03 | NA       |
| ENSG00000182179 | -1.564 | 2.89E-03 | UBA7     |
| ENSG00000238179 | -1.533 | 9.70E-03 | NA       |
| ENSG00000198467 | -1.498 | 5.10E-06 | TPM2     |
| ENSG00000144045 | -1.461 | 7.19E-03 | DQX1     |
| ENSG00000163239 | -1.426 | 1.16E-03 | TDRD10   |
| ENSG00000169436 | -1.419 | 7.69E-03 | COL22A1  |
| ENSG00000231916 | -1.414 | 1.97E-04 | NA       |
| ENSG00000188981 | -1.379 | 8.80E-03 | MSANTD1  |
| ENSG00000134954 | -1.373 | 4.34E-03 | ETS1     |
| ENSG00000184371 | -1.348 | 8.84E-03 | CSF1     |
| ENSG00000173926 | -1.328 | 5.10E-03 | MARC3    |
| ENSG00000091129 | -1.242 | 6.04E-06 | NRCAM    |
| ENSG00000225992 | -1.234 | 4.01E-03 | NA       |
| ENSG00000162069 | -1.210 | 9.06E-03 | BICDL2   |
| ENSG00000225264 | -1.177 | 7.11E-03 | NA       |
| ENSG00000232961 | -1.138 | 5.07E-03 | NA       |
| ENSG00000229715 | -1.134 | 1.54E-03 | NA       |
| ENSG00000114790 | -1.120 | 9.34E-06 | ARHGEF26 |
| ENSG00000226450 | -1.109 | 1.60E-03 | NA       |
| ENSG00000114626 | -1.092 | 3.90E-05 | ABTB1    |
| ENSG00000165023 | -1.086 | 2.63E-03 | DIRAS2   |
| ENSG00000237387 | -1.081 | 4.76E-03 | NA       |
| ENSG00000231965 | -1.069 | 6.11E-03 | NA       |
| ENSG00000005961 | -1.056 | 3.20E-03 | ITGA2B   |
| ENSG00000010327 | -1.008 | 8.49E-03 | STAB1    |
| ENSG00000115705 | -1.005 | 9.89E-04 | TPO      |
| ENSG00000103460 | -1.004 | 1.04E-03 | TOX3     |
| ENSG00000153246 | -1.002 | 8.42E-04 | PLA2R1   |
| ENSG00000154553 | -1.001 | 8.16E-06 | PDLIM3   |
| ENSG00000198417 | 1.002  | 5.56E-03 | MT1F     |
| ENSG00000237598 | 1.011  | 3.75E-03 | NA       |
| ENSG00000086205 | 1.022  | 3.85E-03 | FOLH1    |
| ENSG00000119138 | 1.023  | 2.56E-05 | KLF9     |
| ENSG00000188643 | 1.028  | 7.66E-03 | S100A16  |
| ENSG00000128536 | 1.029  | 2.17E-04 | CDHR3    |
| ENSG00000081138 | 1.040  | 1.76E-04 | CDH7     |
| ENSG00000139970 | 1.049  | 1.58E-03 | RTN1     |

|                 |       |          |          |
|-----------------|-------|----------|----------|
| ENSG00000235796 | 1.084 | 7.64E-03 | NA       |
| ENSG00000109107 | 1.087 | 3.86E-03 | ALDOC    |
| ENSG00000131016 | 1.095 | 9.04E-06 | AKAP12   |
| ENSG00000152952 | 1.102 | 9.51E-03 | PLOD2    |
| ENSG00000182870 | 1.118 | 8.19E-03 | GALNT9   |
| ENSG00000180785 | 1.119 | 1.98E-04 | OR51E1   |
| ENSG00000067798 | 1.146 | 8.79E-03 | NAV3     |
| ENSG00000166780 | 1.189 | 5.77E-03 | C16orf45 |
| ENSG00000134107 | 1.204 | 1.59E-03 | BHLHE40  |
| ENSG00000201098 | 1.206 | 1.22E-03 | RNY1     |
| ENSG00000234459 | 1.213 | 6.21E-03 | NA       |
| ENSG00000229904 | 1.215 | 2.11E-06 | NA       |
| ENSG00000091844 | 1.217 | 1.05E-03 | RGS17    |
| ENSG00000171522 | 1.217 | 5.01E-03 | PTGER4   |
| ENSG00000122585 | 1.231 | 1.78E-03 | NPY      |
| ENSG00000142515 | 1.237 | 1.45E-05 | KLK3     |
| ENSG00000103005 | 1.240 | 8.26E-03 | USB1     |
| ENSG00000131771 | 1.243 | 6.25E-03 | PPP1R1B  |
| ENSG00000118997 | 1.247 | 2.14E-04 | DNAH7    |
| ENSG00000048052 | 1.251 | 7.56E-03 | HDAC9    |
| ENSG00000167183 | 1.275 | 3.13E-04 | PRR15L   |
| ENSG00000146674 | 1.280 | 5.78E-03 | IGFBP3   |
| ENSG00000144339 | 1.308 | 4.62E-04 | TMEFF2   |
| ENSG00000182791 | 1.311 | 8.44E-03 | CCDC87   |
| ENSG00000232125 | 1.312 | 6.26E-03 | DYTN     |
| ENSG00000149212 | 1.325 | 2.03E-05 | SESN3    |
| ENSG00000187193 | 1.330 | 3.20E-04 | MT1X     |
| ENSG00000159860 | 1.331 | 6.58E-03 | NA       |
| ENSG00000005108 | 1.342 | 5.94E-05 | THSD7A   |
| ENSG00000112964 | 1.351 | 9.44E-03 | GHR      |
| ENSG00000152766 | 1.358 | 8.27E-03 | ANKRD22  |
| ENSG00000176951 | 1.371 | 8.24E-03 | NA       |
| ENSG00000107518 | 1.377 | 4.36E-04 | ATRNL1   |
| ENSG00000174749 | 1.389 | 7.32E-03 | C4orf32  |
| ENSG00000233766 | 1.418 | 1.99E-03 | NA       |
| ENSG00000143153 | 1.421 | 1.70E-06 | ATP1B1   |
| ENSG00000188257 | 1.422 | 6.30E-04 | PLA2G2A  |
| ENSG00000177103 | 1.430 | 9.46E-03 | DSCAML1  |
| ENSG00000102048 | 1.434 | 7.81E-04 | ASB9     |

|                 |       |          |          |
|-----------------|-------|----------|----------|
| ENSG00000171282 | 1.450 | 2.99E-03 | NA       |
| ENSG00000171951 | 1.558 | 1.33E-04 | SCG2     |
| ENSG00000167434 | 1.565 | 3.35E-03 | CA4      |
| ENSG00000069188 | 1.575 | 9.61E-04 | SDK2     |
| ENSG00000107249 | 1.578 | 5.31E-03 | GLIS3    |
| ENSG00000127863 | 1.578 | 9.96E-03 | TNFRSF19 |
| ENSG00000124466 | 1.660 | 7.48E-03 | LYPD3    |
| ENSG00000204589 | 1.666 | 4.68E-04 | NA       |
| ENSG00000136999 | 1.710 | 4.04E-05 | NOV      |
| ENSG00000102010 | 1.736 | 7.37E-04 | BMX      |
| ENSG00000174132 | 1.738 | 3.06E-03 | FAM174A  |
| ENSG00000129654 | 1.747 | 6.19E-05 | FOXJ1    |
| ENSG00000196368 | 1.758 | 2.50E-03 | NUDT11   |
| ENSG00000147889 | 1.779 | 6.39E-03 | CDKN2A   |
| ENSG00000135074 | 1.822 | 5.59E-03 | ADAM19   |
| ENSG00000175267 | 1.829 | 9.52E-03 | VWA3A    |
| ENSG00000111319 | 1.852 | 1.72E-04 | SCNN1A   |
| ENSG00000117600 | 1.917 | 6.13E-03 | PLPPR4   |
| ENSG00000135378 | 1.927 | 6.56E-03 | PRRG4    |
| ENSG00000167332 | 1.929 | 3.92E-06 | OR51E2   |
| ENSG00000144290 | 1.943 | 1.77E-03 | SLC4A10  |
| ENSG00000228862 | 2.034 | 8.40E-03 | NA       |
| ENSG00000106236 | 2.125 | 9.74E-05 | NPTX2    |
| ENSG00000157404 | 2.178 | 5.67E-03 | KIT      |
| ENSG00000123095 | 2.194 | 1.38E-05 | BHLHE41  |
| ENSG00000173947 | 2.231 | 3.56E-03 | PIFO     |
| ENSG00000156298 | 2.268 | 1.12E-03 | TSPAN7   |
| ENSG00000226230 | 2.305 | 6.15E-04 | NA       |
| ENSG00000227418 | 2.736 | 9.24E-03 | PCGEM1   |
| ENSG00000033122 | 2.740 | 6.21E-03 | LRRC7    |
| ENSG00000089250 | 2.819 | 3.86E-03 | NOS1     |
| ENSG00000197674 | 2.823 | 6.94E-04 | NA       |
| ENSG00000227972 | 2.860 | 5.60E-03 | NA       |
| ENSG00000005059 | 2.979 | 4.44E-03 | MCUB     |
| ENSG00000226677 | 3.006 | 5.94E-03 | NA       |
| ENSG00000228558 | 3.197 | 2.98E-03 | NA       |
| ENSG00000215973 | 3.199 | 2.87E-03 | MIR933   |
| ENSG00000153823 | 3.368 | 6.45E-03 | PID1     |
| ENSG00000183833 | 3.411 | 8.80E-03 | MAATS1   |

|                 |       |          |        |
|-----------------|-------|----------|--------|
| ENSG00000128322 | 3.467 | 5.54E-03 | IGLL1  |
| ENSG00000187957 | 3.835 | 8.03E-04 | DNER   |
| ENSG00000166509 | 4.491 | 4.17E-03 | CLEC3A |
| ENSG00000170369 | 5.112 | 8.12E-04 | CST2   |

**Supplementary Table S4: Differentially expressed genes (DEGs) in AER vs. Pre-Cx using stringent statistical cutoff and the levels of the same differentially expressed genes in CRPC vs Pre-Cx.** Expression data from RNA sequencing of serial biopsies of VCaP tumors prior to castration (Pre-Cx), at castration-resistance (CRPC) and following development of abiraterone and enzalutamide resistance (AER). A more stringent statistical cutoff ( $\text{Log}_2(\text{FC}) \geq 2.5$  and  $P \leq 1.00\text{E-}05$ ) was used to reduce the number of DEGs in the AER vs Pre-Cx comparison to 72 (as depicted in Fig. 2C), then the levels of those genes were determined in the CRPC vs Pre-Cx comparison. Differentially expression of all genes was in the same direction for both comparisons.  $\text{Log}_2\text{FC}$  –  $\log_2$  fold change.

| AER vs Pre-Cx     |                       |          | CRPC vs Pre-Cx |                       |          |
|-------------------|-----------------------|----------|----------------|-----------------------|----------|
| Upregulated Genes |                       |          |                |                       |          |
| Gene              | Log <sub>2</sub> (FC) | P Value  | Gene           | Log <sub>2</sub> (FC) | P Value  |
| TMEFF2            | 5.44                  | 9.94E-08 | TMEFF2         | 4.13                  | 6.68E-06 |
| OR51E1            | 5.39                  | 1.39E-08 | OR51E1         | 4.27                  | 6.19E-07 |
| OR51E2            | 4.60                  | 7.82E-08 | OR51E2         | 2.67                  | 1.77E-04 |
| AR                | 4.48                  | 3.42E-15 | AR             | 4.44                  | 1.27E-14 |
| BHLHE41           | 4.46                  | 1.99E-06 | BHLHE41        | 2.27                  | 5.03E-03 |
| NOV               | 4.42                  | 1.74E-06 | NOV            | 2.71                  | 8.56E-04 |
| SCG2              | 4.16                  | 1.62E-06 | SCG2           | 2.60                  | 7.05E-04 |
| FOLH1             | 4.05                  | 3.08E-06 | FOLH1          | 3.03                  | 1.67E-04 |
| FRAS1             | 3.98                  | 3.30E-06 | FRAS1          | 3.14                  | 9.17E-05 |
| LOC100130417      | 3.84                  | 4.98E-06 | LOC100130417   | 3.02                  | 1.37E-04 |
| SDC2              | 3.80                  | 1.29E-07 | SDC2           | 3.67                  | 3.19E-07 |
| NR3C2             | 3.73                  | 7.08E-10 | NR3C2          | 2.82                  | 1.27E-07 |
| EPHA4             | 3.53                  | 5.79E-08 | EPHA4          | 2.71                  | 4.84E-06 |
| LRFN2             | 3.44                  | 6.18E-06 | LRFN2          | 3.68                  | 3.28E-06 |
| DNAH7             | 3.28                  | 5.44E-07 | DNAH7          | 2.03                  | 4.35E-04 |
| ANK2              | 3.27                  | 1.35E-06 | ANK2           | 2.31                  | 2.02E-04 |
| THBS1             | 3.20                  | 4.41E-10 | THBS1          | 2.48                  | 6.84E-08 |
| RTN1              | 3.10                  | 9.74E-07 | RTN1           | 2.05                  | 3.29E-04 |
| LINC02418         | 3.06                  | 3.12E-06 | LINC02418      | 2.46                  | 8.22E-05 |
| COLEC12           | 2.97                  | 2.17E-09 | COLEC12        | 2.42                  | 1.20E-07 |
| ADAM7             | 2.88                  | 2.08E-07 | ADAM7          | 2.91                  | 2.93E-07 |
| SESN3             | 2.85                  | 5.43E-09 | SESN3          | 2.93                  | 3.32E-09 |
| VWA5B1            | 2.78                  | 2.97E-09 | VWA5B1         | 2.93                  | 3.32E-09 |
| KLF9              | 2.73                  | 2.75E-09 | KLF9           | 1.70                  | 8.19E-06 |
| NRXN2             | 2.69                  | 1.51E-10 | NRXN2          | 2.56                  | 8.94E-10 |
| SAMD11            | 2.68                  | 8.62E-07 | SAMD11         | 1.83                  | 2.29E-04 |
| PTGER2            | 2.67                  | 4.50E-08 | PTGER2         | 2.82                  | 3.40E-08 |
| CACNA1C           | 2.63                  | 2.54E-10 | CACNA1C        | 2.87                  | 1.56E-10 |
| SATB1             | 2.61                  | 1.37E-08 | SATB1          | 2.91                  | 4.88E-09 |

| AER vs Pre-Cx       |          |          | CRPC vs Pre-Cx  |          |          |
|---------------------|----------|----------|-----------------|----------|----------|
| Downregulated Genes |          |          |                 |          |          |
| Gene                | Log2(FC) | P Value  | Gene            | Log2(FC) | P Value  |
| FAM189A2            | -7.70    | 1.49E-08 | FAM189A2        | -4.45    | 2.47E-08 |
| DPP4                | -6.83    | 5.40E-13 | DPP4            | -5.77    | 2.86E-12 |
| SH3RF2              | -5.17    | 1.47E-06 | SH3RF2          | -5.17    | 1.46E-05 |
| CACNG4              | -5.14    | 5.27E-08 | CACNG4          | -4.81    | 1.22E-06 |
| VSTM2A              | -5.01    | 5.87E-10 | VSTM2A          | -6.28    | 1.17E-07 |
| ST6GALNAC1          | -5.00    | 7.85E-09 | ST6GALNAC1      | -2.84    | 4.39E-07 |
| VSTM2A-OT1          | -4.93    | 2.19E-06 | VSTM2A-OT1      | -3.29    | 4.78E-04 |
| TESC                | -4.87    | 8.82E-11 | TESC            | -4.37    | 2.45E-09 |
| HABP2               | -4.84    | 9.82E-06 | HABP2           | -3.33    | 2.40E-04 |
| ALDH1A1             | -4.74    | 3.71E-10 | ALDH1A1         | -3.02    | 2.45E-08 |
| LUZP2               | -4.62    | 1.80E-09 | LUZP2           | -4.61    | 7.92E-08 |
| TRPM8               | -4.23    | 1.32E-12 | TRPM8           | -2.12    | 4.98E-08 |
| TMSB15A             | -4.04    | 4.27E-06 | TMSB15A         | -3.31    | 9.76E-05 |
| LOC101929653        | -3.98    | 1.85E-10 | LOC101929653    | -2.94    | 1.31E-08 |
| FRMPD3              | -3.62    | 5.52E-07 | FRMPD3          | -3.07    | 1.23E-05 |
| SPOCK2              | -3.57    | 3.09E-11 | SPOCK2          | -3.68    | 4.70E-10 |
| STEAP4              | -3.56    | 1.78E-13 | STEAP4          | -3.36    | 4.38E-12 |
| COL4A5              | -3.49    | 5.26E-12 | COL4A5          | -2.60    | 9.02E-10 |
| DIRAS2              | -3.43    | 1.19E-10 | DIRAS2          | -2.34    | 2.42E-08 |
| CRISP2              | -3.34    | 4.23E-06 | CRISP2          | -2.64    | 1.48E-04 |
| ANKRD29             | -3.33    | 8.85E-10 | ANKRD29         | -2.57    | 8.26E-08 |
| HLA-DMA             | -3.19    | 1.60E-10 | HLA-DMA         | -2.99    | 4.54E-09 |
| KRT14               | -3.11    | 5.13E-06 | KRT14           | -2.95    | 1.12E-04 |
| NRCAM               | -3.05    | 1.25E-12 | NRCAM           | -1.81    | 3.48E-09 |
| LAMA3               | -2.97    | 6.92E-15 | LAMA3           | -2.35    | 1.32E-12 |
| UGT2B4              | -2.96    | 9.56E-08 | UGT2B4          | -2.53    | 4.34E-06 |
| NNMT                | -2.95    | 7.80E-08 | NNMT            | -2.02    | 1.02E-05 |
| SLC27A6             | -2.93    | 1.54E-06 | SLC27A6         | -2.35    | 5.65E-05 |
| NTM                 | -2.88    | 4.30E-08 | NTM             | -1.90    | 1.00E-05 |
| ESRRG               | -2.86    | 1.00E-09 | ESRRG           | -2.94    | 2.37E-08 |
| HGD                 | -2.85    | 1.30E-10 | HGD             | -2.13    | 2.37E-08 |
| MCCC2               | -2.84    | 4.74E-09 | MCCC2           | -1.97    | 2.38E-06 |
| MCC                 | -2.80    | 4.26E-11 | MCC             | -1.05    | 3.82E-05 |
| VWF                 | -2.77    | 7.72E-07 | VWF             | -2.20    | 3.59E-05 |
| CUEDC1              | -2.77    | 3.29E-07 | CUEDC1          | -1.87    | 4.88E-05 |
| ENSG00000213777     | -2.77    | 3.00E-13 | ENSG00000213777 | -2.55    | 1.03E-11 |
| WISP1               | -2.64    | 9.63E-06 | WISP1           | -2.06    | 3.29E-04 |
| TOX3                | -2.62    | 8.55E-10 | TOX3            | -1.62    | 1.08E-06 |
| C4orf19             | -2.62    | 2.52E-09 | C4orf19         | -1.68    | 2.30E-06 |

|                |       |          |                |       |          |
|----------------|-------|----------|----------------|-------|----------|
| <b>TG</b>      | -2.62 | 2.03E-09 | <b>TG</b>      | -2.46 | 6.36E-08 |
| <b>ELOVL2</b>  | -2.61 | 6.56E-11 | <b>ELOVL2</b>  | -2.65 | 1.18E-09 |
| <b>CNKSR2</b>  | -2.56 | 1.47E-09 | <b>CNKSR2</b>  | -1.94 | 2.30E-07 |
| <b>MICALCL</b> | -2.50 | 8.26E-07 | <b>MICALCL</b> | -2.61 | 1.09E-05 |



**Supplementary Table S5: Differentially expressed AR target genes in serial biopsies of VCaP xenografts, AER vs. Pre-Cx.** Expression data of a curated list of AR target genes from RNA sequencing of serial biopsies of VCaP tumors prior to castration (Pre-Cx) and following development of abiraterone plus enzalutamide resistance (AER). log<sub>2</sub>FC – log<sub>2</sub> fold change, Avg. Exp. – Average Expression.

| Ensemble ID     | log <sub>2</sub> FC | P Value  | Symbol  |
|-----------------|---------------------|----------|---------|
| ENSG00000197635 | -6.831              | 5.40E-13 | DPP4    |
| ENSG00000204257 | -3.187              | 1.60E-10 | HLA-DMA |
| ENSG00000131844 | -2.837              | 4.74E-09 | MCCC2   |
| ENSG00000149218 | -2.384              | 5.00E-10 | ENDOD1  |
| ENSG00000116133 | -2.303              | 1.74E-08 | DHCR24  |
| ENSG00000145703 | -1.924              | 2.84E-09 | IQGAP2  |
| ENSG00000125257 | -1.655              | 3.21E-11 | ABCC4   |
| ENSG00000151503 | -1.628              | 3.66E-11 | NCAPD3  |
| ENSG00000014914 | -1.566              | 1.27E-02 | MTMR11  |
| ENSG00000117143 | -1.541              | 1.19E-09 | UAP1    |
| ENSG00000173482 | -1.520              | 2.72E-06 | PTPRM   |
| ENSG00000145088 | -1.462              | 4.93E-02 | EAF2    |
| ENSG00000112343 | -1.442              | 1.44E-06 | TRIM38  |
| ENSG00000080709 | -1.395              | 1.99E-06 | KCNN2   |
| ENSG00000167751 | -1.367              | 5.68E-09 | KLK2    |
| ENSG00000157911 | -1.332              | 3.36E-07 | PEX10   |
| ENSG00000141401 | -1.271              | 2.51E-04 | IMPA2   |
| ENSG00000100297 | -1.256              | 1.04E-06 | MCM5    |
| ENSG00000103222 | -1.232              | 2.88E-07 | ABCC1   |
| ENSG00000163251 | -1.217              | 2.00E-07 | FZD5    |
| ENSG00000115758 | -1.155              | 1.55E-07 | ODC1    |
| ENSG00000123983 | -1.146              | 2.74E-08 | ACSL3   |
| ENSG00000124713 | -1.141              | 3.12E-02 | GNMT    |
| ENSG00000094804 | -1.108              | 3.27E-04 | CDC6    |
| ENSG00000008513 | -1.071              | 1.50E-03 | ST3GAL1 |
| ENSG00000156802 | -1.053              | 1.19E-06 | ATAD2   |
| ENSG00000130164 | -1.046              | 7.91E-07 | LDLR    |
| ENSG00000104738 | -1.005              | 9.07E-06 | MCM4    |
| ENSG00000177425 | -0.990              | 3.83E-07 | PAWR    |
| ENSG00000143476 | -0.981              | 1.58E-04 | DTL     |

|                 |        |          |          |
|-----------------|--------|----------|----------|
| ENSG00000130513 | -0.966 | 2.67E-03 | GDF15    |
| ENSG00000124664 | -0.957 | 3.57E-07 | SPDEF    |
| ENSG00000164045 | -0.904 | 2.15E-04 | CDC25A   |
| ENSG00000133119 | -0.857 | 1.94E-04 | RFC3     |
| ENSG00000169213 | -0.832 | 1.91E-04 | RAB3B    |
| ENSG00000112118 | -0.768 | 1.55E-04 | MCM3     |
| ENSG00000135090 | -0.767 | 5.93E-03 | TAOK3    |
| ENSG00000027075 | -0.763 | 4.10E-04 | PRKCH    |
| ENSG00000186480 | -0.760 | 1.63E-03 | INSIG1   |
| ENSG00000168496 | -0.753 | 1.19E-03 | FEN1     |
| ENSG00000105939 | -0.734 | 5.45E-06 | ZC3HAV1  |
| ENSG00000137710 | -0.718 | 7.99E-05 | RDX      |
| ENSG00000117308 | -0.716 | 3.46E-02 | GALE     |
| ENSG00000081377 | -0.677 | 6.71E-02 | CDC14B   |
| ENSG00000067064 | -0.645 | 6.71E-04 | IDI1     |
| ENSG00000110723 | -0.606 | 5.25E-04 | EXPH5    |
| ENSG00000147526 | -0.585 | 5.45E-05 | TACC1    |
| ENSG00000146950 | -0.575 | 1.29E-04 | SHROOM2  |
| ENSG00000008083 | -0.574 | 2.36E-03 | JARID2   |
| ENSG00000141424 | -0.561 | 3.97E-05 | SLC39A6  |
| ENSG00000113645 | -0.553 | 3.05E-04 | WWC1     |
| ENSG00000196620 | -0.538 | 6.63E-02 | UGT2B15  |
| ENSG00000051825 | -0.530 | 4.73E-04 | MPHOSPH9 |
| ENSG00000213639 | -0.524 | 1.80E-04 | PPP1CB   |
| ENSG00000096060 | -0.522 | 1.22E-02 | FKBP5    |
| ENSG00000132780 | -0.520 | 9.32E-04 | NASP     |
| ENSG00000153132 | -0.498 | 1.43E-03 | CLGN     |
| ENSG00000103942 | -0.496 | 1.83E-04 | HOMER2   |
| ENSG00000109320 | -0.470 | 4.61E-03 | NFKB1    |
| ENSG00000109089 | -0.466 | 2.67E-02 | CDR2L    |
| ENSG00000196781 | -0.463 | 1.17E-01 | TLE1     |
| ENSG00000172175 | -0.462 | 7.45E-03 | MALT1    |
| ENSG00000121057 | -0.450 | 1.83E-03 | AKAP1    |
| ENSG00000083642 | -0.441 | 2.80E-03 | PDS5B    |
| ENSG00000084676 | -0.440 | 3.28E-03 | NCOA1    |
| ENSG00000113161 | -0.438 | 1.20E-02 | HMGCR    |
| ENSG00000197822 | -0.431 | 1.11E-02 | OCLN     |
| ENSG00000135596 | -0.426 | 2.51E-02 | MICAL1   |
| ENSG00000160191 | -0.422 | 2.38E-03 | PDE9A    |

|                 |        |          |           |
|-----------------|--------|----------|-----------|
| ENSG00000197965 | -0.416 | 2.97E-03 | MPZL1     |
| ENSG00000110931 | -0.411 | 2.36E-03 | CAMKK2    |
| ENSG00000143753 | -0.405 | 1.17E-02 | DEGS1     |
| ENSG00000096080 | -0.387 | 3.71E-02 | MRPS18A   |
| ENSG00000182795 | -0.386 | 1.78E-03 | C1orf116  |
| ENSG00000228278 | -0.383 | 4.73E-01 | ORM2      |
| ENSG00000120053 | -0.358 | 3.55E-02 | GOT1      |
| ENSG00000171608 | -0.352 | 1.19E-01 | PIK3CD    |
| ENSG00000159322 | -0.350 | 1.44E-02 | ADPGK     |
| ENSG00000213029 | -0.348 | 1.96E-01 | SPHAR     |
| ENSG00000135862 | -0.342 | 6.45E-03 | LAMC1     |
| ENSG00000166444 | -0.333 | 1.14E-01 | ST5       |
| ENSG00000171617 | -0.333 | 3.20E-02 | ENC1      |
| ENSG00000115091 | -0.331 | 3.41E-02 | ACTR3     |
| ENSG00000174669 | -0.325 | 1.42E-02 | SLC29A2   |
| ENSG00000160285 | -0.313 | 2.43E-02 | LSS       |
| ENSG00000079459 | -0.313 | 1.00E-01 | FDFT1     |
| ENSG00000005810 | -0.303 | 1.15E-02 | MYCBP2    |
| ENSG00000164941 | -0.299 | 2.44E-02 | INTS8     |
| ENSG00000109906 | -0.293 | 6.90E-02 | ZBTB16    |
| ENSG00000072134 | -0.288 | 3.79E-02 | EPN2      |
| ENSG00000076554 | -0.280 | 3.13E-02 | TPD52     |
| ENSG00000140263 | -0.253 | 9.52E-02 | SORD      |
| ENSG00000166224 | -0.244 | 8.08E-02 | SGPL1     |
| ENSG00000137700 | -0.240 | 1.05E-01 | SLC37A4   |
| ENSG00000147162 | -0.240 | 5.44E-02 | OGT       |
| ENSG00000065485 | -0.237 | 8.70E-02 | PDIA5     |
| ENSG00000184678 | -0.232 | 1.74E-01 | HIST2H2BE |
| ENSG00000127314 | -0.231 | 2.26E-01 | RAP1B     |
| ENSG00000066926 | -0.217 | 1.16E-01 | FECH      |
| ENSG00000069275 | -0.205 | 6.88E-02 | NUCKS1    |
| ENSG00000198648 | -0.204 | 2.07E-01 | STK39     |
| ENSG00000111885 | -0.203 | 7.02E-01 | MAN1A1    |
| ENSG00000110660 | -0.197 | 9.95E-02 | SLC35F2   |
| ENSG00000205189 | -0.192 | 1.32E-01 | ZBTB10    |
| ENSG00000117479 | -0.191 | 2.23E-01 | SLC19A2   |
| ENSG00000163625 | -0.189 | 8.17E-02 | WDFY3     |
| ENSG00000162889 | -0.177 | 3.86E-01 | MAPKAPK2  |
| ENSG00000146143 | -0.175 | 3.54E-01 | PRIM2     |

|                 |        |          |           |
|-----------------|--------|----------|-----------|
| ENSG00000136935 | -0.165 | 2.61E-01 | GOLGA1    |
| ENSG00000100726 | -0.151 | 3.09E-01 | TELO2     |
| ENSG00000136478 | -0.150 | 2.56E-01 | TEX2      |
| ENSG00000012660 | -0.149 | 2.70E-01 | ELOVL5    |
| ENSG00000180370 | -0.141 | 2.51E-01 | PAK2      |
| ENSG00000100354 | -0.136 | 1.66E-01 | TNRC6B    |
| ENSG00000117713 | -0.129 | 2.75E-01 | ARID1A    |
| ENSG00000100485 | -0.122 | 3.88E-01 | SOS2      |
| ENSG00000136699 | -0.122 | 3.53E-01 | SMPD4     |
| ENSG00000184254 | -0.121 | 4.68E-01 | ALDH1A3   |
| ENSG00000198900 | -0.120 | 3.16E-01 | TOP1      |
| ENSG00000085274 | -0.115 | 4.80E-01 | MYNN      |
| ENSG00000120889 | -0.112 | 4.19E-01 | TNFRSF10B |
| ENSG00000162959 | -0.109 | 6.93E-01 | MEMO1     |
| ENSG00000187953 | -0.108 | 4.95E-01 | PMS2CL    |
| ENSG00000168610 | -0.108 | 4.26E-01 | STAT3     |
| ENSG00000160179 | -0.107 | 4.33E-01 | ABCG1     |
| ENSG00000100902 | -0.104 | 4.78E-01 | PSMA6     |
| ENSG00000160113 | -0.102 | 4.79E-01 | NR2F6     |
| ENSG00000159082 | -0.101 | 5.49E-01 | SYNJ1     |
| ENSG00000179409 | -0.098 | 4.38E-01 | GEMIN4    |
| ENSG00000058600 | -0.089 | 5.80E-01 | POLR3E    |
| ENSG00000100201 | -0.088 | 4.02E-01 | DDX17     |
| ENSG00000110108 | -0.083 | 6.40E-01 | TMEM109   |
| ENSG00000147454 | -0.076 | 5.78E-01 | SLC25A37  |
| ENSG00000159692 | -0.071 | 5.70E-01 | CTBP1     |
| ENSG00000135365 | -0.065 | 6.00E-01 | PHF21A    |
| ENSG00000066654 | -0.063 | 6.39E-01 | THUMPD1   |
| ENSG00000172432 | -0.053 | 6.91E-01 | GTPBP2    |
| ENSG00000104419 | -0.053 | 5.77E-01 | NDRG1     |
| ENSG00000102908 | -0.046 | 7.33E-01 | NFAT5     |
| ENSG00000173848 | -0.034 | 7.82E-01 | NET1      |
| ENSG00000099204 | -0.034 | 7.74E-01 | ABLIM1    |
| ENSG00000166451 | -0.025 | 8.81E-01 | CENPN     |
| ENSG00000185129 | -0.023 | 8.87E-01 | PURA      |
| ENSG00000124766 | -0.014 | 9.09E-01 | SOX4      |
| ENSG00000100105 | -0.010 | 9.36E-01 | PATZ1     |
| ENSG00000168118 | -0.003 | 9.83E-01 | RAB4A     |
| ENSG00000147383 | 0.005  | 9.87E-01 | NSDHL     |

|                 |       |          |         |
|-----------------|-------|----------|---------|
| ENSG00000221869 | 0.011 | 9.62E-01 | CEBPD   |
| ENSG00000008283 | 0.023 | 8.56E-01 | CYB561  |
| ENSG00000163430 | 0.027 | 8.11E-01 | FSTL1   |
| ENSG00000122512 | 0.033 | 8.41E-01 | PMS2    |
| ENSG00000166387 | 0.057 | 6.54E-01 | PPFIBP2 |
| ENSG00000107372 | 0.061 | 6.41E-01 | ZFAND5  |
| ENSG00000184012 | 0.063 | 7.03E-01 | TMPRSS2 |
| ENSG00000171492 | 0.072 | 6.50E-01 | LRRC8D  |
| ENSG00000140650 | 0.072 | 7.05E-01 | PMM2    |
| ENSG00000110721 | 0.075 | 6.00E-01 | CHKA    |
| ENSG00000092199 | 0.082 | 4.15E-01 | HNRNPC  |
| ENSG00000143970 | 0.084 | 5.87E-01 | ASXL2   |
| ENSG00000198833 | 0.086 | 4.52E-01 | UBE2J1  |
| ENSG00000157600 | 0.087 | 6.12E-01 | TMEM164 |
| ENSG00000095564 | 0.090 | 4.19E-01 | BTAF1   |
| ENSG00000141543 | 0.091 | 5.24E-01 | EIF4A3  |
| ENSG00000184216 | 0.103 | 4.85E-01 | IRAK1   |
| ENSG00000175283 | 0.105 | 6.61E-01 | DOLK    |
| ENSG00000221914 | 0.116 | 6.82E-01 | PPP2R2A |
| ENSG00000162923 | 0.119 | 2.83E-01 | WDR26   |
| ENSG00000103091 | 0.121 | 3.73E-01 | WDR59   |
| ENSG00000144560 | 0.127 | 3.48E-01 | VGLL4   |
| ENSG00000181751 | 0.141 | 4.49E-01 | C5orf30 |
| ENSG00000156931 | 0.166 | 2.76E-01 | VPS8    |
| ENSG00000138413 | 0.173 | 1.68E-01 | IDH1    |
| ENSG00000157514 | 0.174 | 5.19E-01 | TSC22D3 |
| ENSG00000144034 | 0.185 | 3.54E-01 | TPRKB   |
| ENSG00000140526 | 0.185 | 7.21E-02 | ABHD2   |
| ENSG00000130338 | 0.188 | 1.07E-01 | TULP4   |
| ENSG00000110435 | 0.201 | 1.84E-01 | PDHX    |
| ENSG00000204103 | 0.204 | 5.45E-01 | MAFB    |
| ENSG00000064042 | 0.207 | 8.24E-02 | LIMCH1  |
| ENSG00000087470 | 0.211 | 7.83E-02 | DNM1L   |
| ENSG00000188554 | 0.216 | 5.37E-02 | NBR1    |
| ENSG00000092421 | 0.235 | 5.77E-02 | SEMA6A  |
| ENSG00000185963 | 0.240 | 1.70E-01 | BICD2   |
| ENSG00000115762 | 0.247 | 5.68E-02 | PLEKHB2 |
| ENSG00000166900 | 0.250 | 1.27E-01 | STX3    |
| ENSG00000065882 | 0.270 | 2.38E-01 | TBC1D1  |

|                 |       |          |         |
|-----------------|-------|----------|---------|
| ENSG00000130684 | 0.277 | 1.83E-01 | ZNF337  |
| ENSG00000100906 | 0.294 | 1.10E-01 | NFKBIA  |
| ENSG00000185432 | 0.305 | 3.96E-02 | METTL7A |
| ENSG00000169155 | 0.315 | 2.64E-02 | ZBTB43  |
| ENSG00000167034 | 0.331 | 7.38E-03 | NKX3-1  |
| ENSG00000163788 | 0.332 | 2.20E-02 | SNRK    |
| ENSG00000144827 | 0.353 | 3.93E-02 | ABHD10  |
| ENSG00000080546 | 0.383 | 5.98E-02 | SESN1   |
| ENSG00000148926 | 0.420 | 4.31E-01 | ADM     |
| ENSG00000102226 | 0.424 | 1.82E-02 | USP11   |
| ENSG00000073803 | 0.429 | 1.63E-02 | MAP3K13 |
| ENSG00000023734 | 0.445 | 1.45E-03 | STRAP   |
| ENSG00000090863 | 0.452 | 5.78E-04 | GLG1    |
| ENSG00000082438 | 0.604 | 8.54E-04 | COBLL1  |
| ENSG00000114446 | 0.638 | 2.25E-03 | IFT57   |
| ENSG00000145569 | 0.715 | 1.66E-03 | FAM105A |
| ENSG00000108175 | 0.831 | 2.20E-05 | ZMIZ1   |
| ENSG00000143153 | 0.845 | 1.65E-04 | ATP1B1  |
| ENSG00000124145 | 0.895 | 4.23E-03 | SDC4    |
| ENSG00000196208 | 0.903 | 2.93E-06 | GREB1   |
| ENSG00000176903 | 0.995 | 2.13E-05 | PNMA1   |
| ENSG00000124788 | 0.999 | 1.03E-05 | ATXN1   |
| ENSG00000145779 | 1.070 | 4.47E-02 | TNFAIP8 |
| ENSG00000049759 | 1.115 | 9.86E-08 | NEDD4L  |
| ENSG00000091039 | 1.122 | 7.67E-08 | OSBPL8  |
| ENSG00000104290 | 1.217 | 3.69E-05 | FZD3    |
| ENSG00000118985 | 1.220 | 2.78E-06 | ELL2    |
| ENSG00000106070 | 1.312 | 4.45E-07 | GRB10   |
| ENSG00000142515 | 1.497 | 1.40E-06 | KLK3    |
| ENSG00000185950 | 1.583 | 1.12E-07 | IRS2    |
| ENSG00000075223 | 1.589 | 4.29E-05 | SEMA3C  |
| ENSG00000081181 | 1.671 | 1.02E-07 | ARG2    |
| ENSG00000170365 | 1.763 | 5.03E-04 | SMAD1   |
| ENSG00000133639 | 2.366 | 2.82E-10 | BTG1    |
| ENSG00000069206 | 2.876 | 2.08E-07 | ADAM7   |
| ENSG00000137801 | 3.196 | 4.41E-10 | THBS1   |

**Supplementary Table S6: Differentially expressed AR target genes in serial biopsies of VCaP xenografts, CRPC vs. Pre-Cx.** Expression data of a curated list of AR target genes from RNA sequencing of serial biopsies of VCaP tumors prior to castration (Pre-Cx) and following development of castration resistant prostate cancer (CRPC). log<sub>2</sub>FC – log<sub>2</sub> fold change.

| Ensemble ID     | log <sub>2</sub> FC | P Value  | Symbol  |
|-----------------|---------------------|----------|---------|
| ENSG00000197635 | -5.775              | 2.86E-12 | DPP4    |
| ENSG00000204257 | -2.988              | 4.54E-09 | HLA-DMA |
| ENSG00000116133 | -2.581              | 4.19E-08 | DHCR24  |
| ENSG00000173482 | -2.325              | 6.46E-07 | PTPRM   |
| ENSG00000149218 | -2.190              | 1.63E-08 | ENDOD1  |
| ENSG00000131844 | -1.974              | 2.38E-06 | MCCC2   |
| ENSG00000145703 | -1.740              | 7.25E-08 | IQGAP2  |
| ENSG00000141401 | -1.701              | 1.62E-04 | IMPA2   |
| ENSG00000008513 | -1.526              | 6.12E-04 | ST3GAL1 |
| ENSG00000115758 | -1.481              | 3.18E-08 | ODC1    |
| ENSG00000151503 | -1.467              | 1.07E-09 | NCAPD3  |
| ENSG00000163251 | -1.358              | 2.80E-07 | FZD5    |
| ENSG00000117143 | -1.349              | 4.48E-08 | UAP1    |
| ENSG00000125257 | -1.313              | 5.58E-09 | ABCC4   |
| ENSG00000081377 | -1.263              | 1.39E-02 | CDC14B  |
| ENSG00000123983 | -1.255              | 3.89E-08 | ACSL3   |
| ENSG00000112343 | -1.234              | 4.51E-05 | TRIM38  |
| ENSG00000096060 | -1.190              | 2.98E-05 | FKBP5   |
| ENSG00000103222 | -1.132              | 4.04E-06 | ABCC1   |
| ENSG00000186480 | -1.023              | 4.63E-04 | INSIG1  |
| ENSG00000156802 | -1.022              | 7.27E-06 | ATAD2   |
| ENSG00000143476 | -0.991              | 5.77E-04 | DTL     |
| ENSG00000157911 | -0.963              | 6.26E-05 | PEX10   |
| ENSG00000104738 | -0.932              | 7.63E-05 | MCM4    |
| ENSG00000130164 | -0.925              | 1.59E-05 | LDLR    |
| ENSG00000094804 | -0.885              | 5.32E-03 | CDC6    |
| ENSG00000014914 | -0.879              | 1.45E-01 | MTMR11  |
| ENSG00000100297 | -0.849              | 2.84E-04 | MCM5    |
| ENSG00000137710 | -0.846              | 4.99E-05 | RDX     |
| ENSG00000164045 | -0.838              | 1.39E-03 | CDC25A  |
| ENSG00000112118 | -0.832              | 2.52E-04 | MCM3    |

|                 |        |          |           |
|-----------------|--------|----------|-----------|
| ENSG00000027075 | -0.825 | 6.72E-04 | PRKCH     |
| ENSG00000167751 | -0.811 | 2.29E-05 | KLK2      |
| ENSG00000168496 | -0.809 | 2.18E-03 | FEN1      |
| ENSG00000146950 | -0.796 | 1.42E-05 | SHROOM2   |
| ENSG00000067064 | -0.769 | 5.00E-04 | IDI1      |
| ENSG00000228278 | -0.733 | 2.64E-01 | ORM2      |
| ENSG00000213029 | -0.697 | 4.04E-02 | SPHAR     |
| ENSG00000153132 | -0.694 | 2.40E-04 | CLGN      |
| ENSG00000133119 | -0.680 | 3.79E-03 | RFC3      |
| ENSG00000080709 | -0.678 | 4.99E-03 | KCNN2     |
| ENSG00000198648 | -0.675 | 1.41E-03 | STK39     |
| ENSG00000135090 | -0.663 | 2.80E-02 | TAOK3     |
| ENSG00000066926 | -0.650 | 5.11E-04 | FECH      |
| ENSG00000197822 | -0.634 | 1.97E-03 | OCLN      |
| ENSG00000213639 | -0.629 | 7.97E-05 | PPP1CB    |
| ENSG00000196781 | -0.620 | 7.61E-02 | TLE1      |
| ENSG00000172175 | -0.619 | 2.32E-03 | MALT1     |
| ENSG00000110108 | -0.611 | 9.36E-03 | TMEM109   |
| ENSG00000124664 | -0.607 | 2.49E-04 | SPDEF     |
| ENSG00000148926 | -0.604 | 3.87E-01 | ADM       |
| ENSG00000145779 | -0.590 | 4.07E-01 | TNFAIP8   |
| ENSG00000143753 | -0.589 | 2.19E-03 | DEGS1     |
| ENSG00000143153 | -0.576 | 2.14E-02 | ATP1B1    |
| ENSG00000110723 | -0.574 | 2.21E-03 | EXPH5     |
| ENSG00000079459 | -0.568 | 1.43E-02 | FDFT1     |
| ENSG00000184678 | -0.554 | 8.96E-03 | HIST2H2BE |
| ENSG00000130513 | -0.552 | 8.23E-02 | GDF15     |
| ENSG00000113161 | -0.547 | 6.47E-03 | HMGCR     |
| ENSG00000076554 | -0.544 | 7.74E-04 | TPD52     |
| ENSG00000120053 | -0.539 | 8.23E-03 | GOT1      |
| ENSG00000141424 | -0.519 | 2.66E-04 | SLC39A6   |
| ENSG00000051825 | -0.517 | 1.59E-03 | MPHOSPH9  |
| ENSG00000177425 | -0.511 | 1.54E-03 | PAWR      |
| ENSG00000197965 | -0.510 | 1.46E-03 | MPZL1     |
| ENSG00000105939 | -0.510 | 7.75E-04 | ZC3HAV1   |
| ENSG00000196620 | -0.503 | 1.27E-01 | UGT2B15   |
| ENSG00000113645 | -0.483 | 2.46E-03 | WWC1      |
| ENSG00000145088 | -0.482 | 4.97E-01 | EAF2      |
| ENSG00000084676 | -0.464 | 5.01E-03 | NCOA1     |



|                 |        |          |          |
|-----------------|--------|----------|----------|
| ENSG00000069275 | -0.457 | 1.22E-03 | NUCKS1   |
| ENSG00000135596 | -0.445 | 3.78E-02 | MICAL1   |
| ENSG00000146143 | -0.423 | 6.45E-02 | PRIM2    |
| ENSG00000124713 | -0.419 | 4.03E-01 | GNMT     |
| ENSG00000175283 | -0.415 | 1.65E-01 | DOLK     |
| ENSG00000083642 | -0.410 | 9.86E-03 | PDS5B    |
| ENSG00000169213 | -0.403 | 5.11E-02 | RAB3B    |
| ENSG00000135862 | -0.386 | 5.78E-03 | LAMC1    |
| ENSG00000065485 | -0.362 | 2.50E-02 | PDIA5    |
| ENSG00000109089 | -0.359 | 1.14E-01 | CDR2L    |
| ENSG00000117308 | -0.358 | 3.04E-01 | GALE     |
| ENSG00000066654 | -0.357 | 2.97E-02 | THUMPD1  |
| ENSG00000110931 | -0.355 | 1.27E-02 | CAMKK2   |
| ENSG00000012660 | -0.334 | 3.79E-02 | ELOVL5   |
| ENSG00000182795 | -0.322 | 1.25E-02 | C1orf116 |
| ENSG00000171617 | -0.309 | 6.78E-02 | ENC1     |
| ENSG00000109320 | -0.305 | 7.39E-02 | NFKB1    |
| ENSG00000140263 | -0.303 | 7.67E-02 | SORD     |
| ENSG00000166451 | -0.300 | 1.32E-01 | CENPN    |
| ENSG00000104419 | -0.283 | 1.33E-02 | NDRG1    |
| ENSG00000141543 | -0.275 | 1.05E-01 | EIF4A3   |
| ENSG00000147526 | -0.268 | 4.00E-02 | TACC1    |
| ENSG00000160113 | -0.262 | 1.20E-01 | NR2F6    |
| ENSG00000096080 | -0.262 | 1.89E-01 | MRPS18A  |
| ENSG00000005810 | -0.251 | 4.92E-02 | MYCBP2   |
| ENSG00000159322 | -0.248 | 9.93E-02 | ADPGK    |
| ENSG00000103942 | -0.230 | 6.13E-02 | HOMER2   |
| ENSG00000137700 | -0.229 | 1.63E-01 | SLC37A4  |
| ENSG00000100902 | -0.215 | 2.03E-01 | PSMA6    |
| ENSG00000132780 | -0.211 | 1.57E-01 | NASP     |
| ENSG00000121057 | -0.211 | 1.35E-01 | AKAP1    |
| ENSG00000173848 | -0.200 | 1.61E-01 | NET1     |
| ENSG00000144034 | -0.192 | 4.12E-01 | TPRKB    |
| ENSG00000184012 | -0.189 | 3.12E-01 | TMPRSS2  |
| ENSG00000072134 | -0.188 | 2.03E-01 | EPN2     |
| ENSG00000138413 | -0.187 | 1.84E-01 | IDH1     |
| ENSG00000198900 | -0.186 | 1.68E-01 | TOP1     |
| ENSG00000168118 | -0.175 | 2.60E-01 | RAB4A    |
| ENSG00000115091 | -0.175 | 2.86E-01 | ACTR3    |

|                 |        |          |          |
|-----------------|--------|----------|----------|
| ENSG00000166224 | -0.158 | 2.94E-01 | SGPL1    |
| ENSG00000140526 | -0.151 | 1.79E-01 | ABHD2    |
| ENSG00000124766 | -0.147 | 2.72E-01 | SOX4     |
| ENSG00000008083 | -0.135 | 4.49E-01 | JARID2   |
| ENSG00000168610 | -0.133 | 3.78E-01 | STAT3    |
| ENSG00000160285 | -0.130 | 3.66E-01 | LSS      |
| ENSG00000160191 | -0.128 | 3.40E-01 | PDE9A    |
| ENSG00000100485 | -0.121 | 4.41E-01 | SOS2     |
| ENSG00000205189 | -0.113 | 4.10E-01 | ZBTB10   |
| ENSG00000198833 | -0.102 | 4.25E-01 | UBE2J1   |
| ENSG00000163430 | -0.089 | 4.73E-01 | FSTL1    |
| ENSG00000180370 | -0.089 | 5.08E-01 | PAK2     |
| ENSG00000117713 | -0.081 | 5.31E-01 | ARID1A   |
| ENSG00000162889 | -0.075 | 7.37E-01 | MAPKAPK2 |
| ENSG00000110660 | -0.070 | 5.83E-01 | SLC35F2  |
| ENSG00000065882 | -0.063 | 8.10E-01 | TBC1D1   |
| ENSG00000110435 | -0.061 | 7.14E-01 | PDHX     |
| ENSG00000171492 | -0.061 | 7.35E-01 | LRRC8D   |
| ENSG00000143970 | -0.060 | 7.30E-01 | ASXL2    |
| ENSG00000008283 | -0.050 | 7.21E-01 | CYB561   |
| ENSG00000157600 | -0.047 | 8.08E-01 | TMEM164  |
| ENSG00000166444 | -0.045 | 8.40E-01 | ST5      |
| ENSG00000099204 | -0.040 | 7.59E-01 | ABLIM1   |
| ENSG00000100105 | -0.030 | 8.20E-01 | PATZ1    |
| ENSG00000184254 | -0.029 | 8.73E-01 | ALDH1A3  |
| ENSG00000136935 | -0.026 | 8.68E-01 | GOLGA1   |
| ENSG00000162959 | -0.026 | 9.33E-01 | MEMO1    |
| ENSG00000147383 | -0.025 | 9.38E-01 | NSDHL    |
| ENSG00000136699 | -0.008 | 9.53E-01 | SMPD4    |
| ENSG00000058600 | -0.007 | 9.68E-01 | POLR3E   |
| ENSG00000111885 | -0.006 | 9.91E-01 | MAN1A1   |
| ENSG00000115762 | 0.000  | 9.97E-01 | PLEKHB2  |
| ENSG00000100354 | 0.003  | 9.74E-01 | TNRC6B   |
| ENSG00000164941 | 0.008  | 9.55E-01 | INTS8    |
| ENSG00000163788 | 0.015  | 9.23E-01 | SNRK     |
| ENSG00000136478 | 0.026  | 8.56E-01 | TEX2     |
| ENSG00000023734 | 0.030  | 8.27E-01 | STRAP    |
| ENSG00000166900 | 0.031  | 8.63E-01 | STX3     |
| ENSG00000163625 | 0.034  | 7.64E-01 | WDFY3    |

|                 |       |          |           |
|-----------------|-------|----------|-----------|
| ENSG00000130338 | 0.036 | 7.74E-01 | TULP4     |
| ENSG00000159692 | 0.044 | 7.50E-01 | CTBP1     |
| ENSG00000120889 | 0.044 | 7.70E-01 | TNFRSF10B |
| ENSG00000092199 | 0.052 | 6.40E-01 | HNRNPC    |
| ENSG00000085274 | 0.054 | 7.63E-01 | MYNN      |
| ENSG00000187953 | 0.059 | 7.34E-01 | PMS2CL    |
| ENSG00000188554 | 0.063 | 5.93E-01 | NBR1      |
| ENSG00000179409 | 0.065 | 6.38E-01 | GEMIN4    |
| ENSG00000100726 | 0.071 | 6.59E-01 | TELO2     |
| ENSG00000147454 | 0.079 | 6.00E-01 | SLC25A37  |
| ENSG00000092421 | 0.079 | 5.50E-01 | SEMA6A    |
| ENSG00000107372 | 0.083 | 5.67E-01 | ZFAND5    |
| ENSG00000122512 | 0.086 | 6.35E-01 | PMS2      |
| ENSG00000109906 | 0.089 | 5.95E-01 | ZBTB16    |
| ENSG00000135365 | 0.096 | 4.85E-01 | PHF21A    |
| ENSG00000127314 | 0.096 | 6.36E-01 | RAP1B     |
| ENSG00000157514 | 0.114 | 7.07E-01 | TSC22D3   |
| ENSG00000100201 | 0.118 | 3.07E-01 | DDX17     |
| ENSG00000102908 | 0.126 | 4.01E-01 | NFAT5     |
| ENSG00000102226 | 0.133 | 4.82E-01 | USP11     |
| ENSG00000172432 | 0.136 | 3.53E-01 | GTPBP2    |
| ENSG00000159082 | 0.142 | 4.45E-01 | SYNJ1     |
| ENSG00000174669 | 0.144 | 2.81E-01 | SLC29A2   |
| ENSG00000144827 | 0.150 | 4.15E-01 | ABHD10    |
| ENSG00000166387 | 0.160 | 2.63E-01 | PPFIBP2   |
| ENSG00000117479 | 0.166 | 3.29E-01 | SLC19A2   |
| ENSG00000221869 | 0.167 | 5.23E-01 | CEBPD     |
| ENSG00000185129 | 0.172 | 3.35E-01 | PURA      |
| ENSG00000144560 | 0.176 | 2.43E-01 | VGLL4     |
| ENSG00000162923 | 0.178 | 1.49E-01 | WDR26     |
| ENSG00000181751 | 0.186 | 3.68E-01 | C5orf30   |
| ENSG00000087470 | 0.186 | 1.53E-01 | DNM1L     |
| ENSG00000110721 | 0.190 | 2.35E-01 | CHKA      |
| ENSG00000184216 | 0.215 | 1.92E-01 | IRAK1     |
| ENSG00000167034 | 0.217 | 8.86E-02 | NKX3-1    |
| ENSG00000169155 | 0.238 | 1.18E-01 | ZBTB43    |
| ENSG00000095564 | 0.258 | 4.53E-02 | BTAF1     |
| ENSG00000142515 | 0.260 | 2.92E-01 | KLK3      |
| ENSG00000171608 | 0.262 | 2.61E-01 | PIK3CD    |

|                 |       |          |         |
|-----------------|-------|----------|---------|
| ENSG00000140650 | 0.273 | 2.00E-01 | PMM2    |
| ENSG00000064042 | 0.280 | 3.67E-02 | LIMCH1  |
| ENSG00000185432 | 0.287 | 7.48E-02 | METTL7A |
| ENSG00000147162 | 0.301 | 2.88E-02 | OGT     |
| ENSG00000185963 | 0.315 | 1.06E-01 | BICD2   |
| ENSG00000090863 | 0.319 | 1.56E-02 | GLG1    |
| ENSG00000082438 | 0.322 | 7.03E-02 | COBLL1  |
| ENSG00000114446 | 0.343 | 1.08E-01 | IFT57   |
| ENSG00000204103 | 0.358 | 3.36E-01 | MAFB    |
| ENSG00000103091 | 0.372 | 1.94E-02 | WDR59   |
| ENSG00000073803 | 0.383 | 4.69E-02 | MAP3K13 |
| ENSG00000160179 | 0.389 | 1.49E-02 | ABCG1   |
| ENSG00000080546 | 0.417 | 6.36E-02 | SESN1   |
| ENSG00000221914 | 0.439 | 1.61E-01 | PPP2R2A |
| ENSG00000156931 | 0.457 | 1.09E-02 | VPS8    |
| ENSG00000145569 | 0.501 | 3.21E-02 | FAM105A |
| ENSG00000100906 | 0.557 | 8.82E-03 | NFKBIA  |
| ENSG00000130684 | 0.577 | 1.56E-02 | ZNF337  |
| ENSG00000104290 | 0.630 | 2.34E-02 | FZD3    |
| ENSG00000108175 | 0.639 | 9.00E-04 | ZMIZ1   |
| ENSG00000176903 | 0.664 | 3.01E-03 | PNMA1   |
| ENSG00000196208 | 0.776 | 5.69E-05 | GREB1   |
| ENSG00000091039 | 0.778 | 3.41E-05 | OSBPL8  |
| ENSG00000118985 | 0.805 | 8.19E-04 | ELL2    |
| ENSG00000049759 | 0.814 | 2.24E-05 | NEDD4L  |
| ENSG00000124788 | 1.011 | 2.45E-05 | ATXN1   |
| ENSG00000081181 | 1.215 | 2.44E-05 | ARG2    |
| ENSG00000124145 | 1.267 | 3.68E-04 | SDC4    |
| ENSG00000170365 | 1.303 | 1.09E-02 | SMAD1   |
| ENSG00000106070 | 1.305 | 1.41E-06 | GRB10   |
| ENSG00000185950 | 1.568 | 4.24E-07 | IRS2    |
| ENSG00000133639 | 2.038 | 9.49E-09 | BTG1    |
| ENSG00000075223 | 2.133 | 1.67E-06 | SEMA3C  |
| ENSG00000137801 | 2.481 | 6.84E-08 | THBS1   |
| ENSG00000069206 | 2.910 | 2.93E-07 | ADAM7   |
